# Supplementary material for: Extensive Gene Remodeling in the Viral World: New Evidence for Nongradual Evolution in the Mobilome Network
Source: PubMed Central journal article supplement (PMC4202312; doi:10.1093/gbe/evu168), 2014-08-07
Supplement: supp_evu168_bapteste_table_S3.pdf [file supp_evu168_bapteste_table_S3.pdf]

| Type     | Name                                                            | Number of genes | Baltimore class | Nucleic Acid | Monophyletic group |
|----------|-----------------------------------------------------------------|-----------------|-----------------|--------------|--------------------|
| Archaea  | Aeropyrum pernix K1_1                                           | 1700            |                 |              |                    |
| Archaea  | Archaeoglobus fulgidus DSM 4304_1                               | 2420            |                 |              |                    |
| Archaea  | Archaeoglobus profundus DSM 5631_1                              | 1819            |                 |              |                    |
| Archaea  | Caldivirga maquilingensis IC-167_1                              | 1963            |                 |              |                    |
| Archaea  | Candidatus Korarchaeum cryptofilum OPF8_1                       | 1602            |                 |              |                    |
| Archaea  | Candidatus Methanoregula boonei 6A8_1                           | 2450            |                 |              |                    |
| Archaea  | Candidatus Methanosphaerula palustris E1-9c_1                   | 2655            |                 |              |                    |
| Archaea  | Cenarchaeum symbiosum A_1                                       | 2017            |                 |              |                    |
| Archaea  | Desulfurococcus kamchatkensis 1221n_1                           | 1471            |                 |              |                    |
| Archaea  | Haloarcula marismortui ATCC 43049_1                             | 3131            |                 |              |                    |
| Archaea  | Haloarcula marismortui ATCC 43049_2                             | 281             |                 |              |                    |
| Archaea  | Halobacterium sp. NRC-1_1                                       | 2075            |                 |              |                    |
| Archaea  | Halomicrobium mukohataei DSM 12286_1                            | 3173            |                 |              |                    |
| Archaea  | Haloquadratum walsbyi DSM 16790_1                               | 2610            |                 |              |                    |
| Archaea  | Halorhabdus utahensis DSM 12940_1                               | 2998            |                 |              |                    |
| Archaea  | Halorubrum lacusprofundi ATCC 49239_1                           | 473             |                 |              |                    |
| Archaea  | Halorubrum lacusprofundi ATCC 49239_2                           | 2711            |                 |              |                    |
| Archaea  | Haloterrigena turkmenica DSM 5511_1                             | 3739            |                 |              |                    |
| Archaea  | Hyperthermus butylicus DSM 5456_1                               | 1602            |                 |              |                    |
| Archaea  | Ignicoccus hospitalis KIN4/l_1                                  | 1434            |                 |              |                    |
| Archaea  | Metallosphaera sedula DSM 5348_1                                | 2256            |                 |              |                    |
| Archaea  | Methanobrevibacter ruminantium M1_1                             | 2217            |                 |              |                    |
| Archaea  | Methanocaldococcus fervens AG86_1                               | 1620            |                 |              |                    |
| Archaea  | Methanocella paludicola SANAE_1                                 | 3004            |                 |              |                    |
| Archaea  | Methanococcoides burtonii DSM 6242_1                            | 2273            |                 |              |                    |
| Archaea  | Methanococcus aeolicus Nankai-3_1                               | 1490            |                 |              |                    |
| Archaea  | Methanococcus maripaludis C6_1                                  | 1826            |                 |              |                    |
| Archaea  | Methanococcus vannielii SB_1                                    | 1678            |                 |              |                    |
| Archaea  | Methanocorpusculum labreanum Z_1                                | 1739            |                 |              |                    |
| Archaea  | Methanoculleus marisnigri JR1_1                                 | 2489            |                 |              |                    |
| Archaea  | Methanopyrus kandleri AV19_1                                    | 1687            |                 |              |                    |
| Archaea  | Methanosaepta thermophila PT_1                                  | 1696            |                 |              |                    |
| Archaea  | Methanosarcina acetivorans C2A_1                                | 4540            |                 |              |                    |
| Archaea  | Methanosarcina barkeri str. Fusaro_1                            | 3606            |                 |              |                    |
| Archaea  | Methanosarcina mazei Go1_1                                      | 3368            |                 |              |                    |
| Archaea  | Methanosphaera stadtmanae DSM 3091_1                            | 1534            |                 |              |                    |
| Archaea  | Methanospirillum hungatei JF-1_1                                | 3139            |                 |              |                    |
| Archaea  | Nanoarchaeum equitans Kin4-M_1                                  | 536             |                 |              |                    |
| Archaea  | Natronomonas pharaonis DSM 2160_1                               | 2659            |                 |              |                    |
| Archaea  | Nitrosopumilus maritimus SCM1_1                                 | 1795            |                 |              |                    |
| Archaea  | Picrophilus torridus DSM 9790_1                                 | 1535            |                 |              |                    |
| Archaea  | Pyrobaculum aerophilum str. IM2_1                               | 2603            |                 |              |                    |
| Archaea  | Pyrobaculum arsenaticum DSM 13514_1                             | 2299            |                 |              |                    |
| Archaea  | Pyrococcus abyssi GE5_1                                         | 1780            |                 |              |                    |
| Archaea  | Pyrococcus furiosus DSM 3638_1                                  | 2125            |                 |              |                    |
| Archaea  | Pyrococcus horikoshii OT3_1                                     | 1955            |                 |              |                    |
| Archaea  | Staphylothermus marinus F1_1                                    | 1570            |                 |              |                    |
| Archaea  | Sulfolobus acidocaldarius DSM 639_1                             | 2223            |                 |              |                    |
| Archaea  | Sulfolobus solfataricus P2_1                                    | 2977            |                 |              |                    |
| Archaea  | Thermococcus gammatolerans EJ3_1                                | 2156            |                 |              |                    |
| Archaea  | Thermofilum pendens Hrk 5_1                                     | 1824            |                 |              |                    |
| Archaea  | Thermoplasma acidophilum DSM 1728_1                             | 1482            |                 |              |                    |
| Archaea  | Thermoplasma volcanium GSS1_1                                   | 1499            |                 |              |                    |
| Archaea  | Thermoproteus neutrophilus V24Sta_1                             | 1966            |                 |              |                    |
| Bacteria | Acholeplasma laidlawii PG-8A_1                                  | 1380            |                 |              |                    |
| Bacteria | Acidobacterium capsulatum ATCC 51196_1                          | 3377            |                 |              |                    |
| Bacteria | Akkermansia muciniphila ATCC BAA-835_1                          | 2138            |                 |              |                    |
| Bacteria | Alicyclobacillus acidocaldarius subsp. acidocaldarius DSM 446_1 | 2888            |                 |              |                    |
| Bacteria | Aquifex aeolicus VF5_1                                          | 1529            |                 |              |                    |
| Bacteria | Bacillus cereus Q1_1                                            | 5191            |                 |              |                    |
| Bacteria | Bacteroides fragilis YCH46_1                                    | 4578            |                 |              |                    |
| Bacteria | Bdellovibrio bacteriovorus HD100_1                              | 3587            |                 |              |                    |
| Bacteria | Bordetella pertussis Tohama 1_1                                 | 3436            |                 |              |                    |
| Bacteria | Campylobacter jejuni subsp. jejuni 81-176_1                     | 1653            |                 |              |                    |
| Bacteria | Candidatus Cloacamonas acidaminovorans_1                        | 1815            |                 |              |                    |
| Bacteria | Candidatus Endomicrobium sp. Rs-D17_1                           | 776             |                 |              |                    |
| Bacteria | Carboxydotherrmus hydrogenoformans Z-2901_1                     | 2620            |                 |              |                    |
| Bacteria | Chlamydia trachomatis 434/Bu_1                                  | 874             |                 |              |                    |
| Bacteria | Chlorobium chlorochromatii CaD3_1                               | 2002            |                 |              |                    |
| Bacteria | Chloroflexus aurantiacus J-10-fl_1                              | 3853            |                 |              |                    |
| Bacteria | Clostridium acetobutylicum ATCC 824_1                           | 3671            |                 |              |                    |
| Bacteria | Clostridium perfringens SM101_1                                 | 2546            |                 |              |                    |
| Bacteria | Corynebacterium glutamicum ATCC 13032_1                         | 3057            |                 |              |                    |
| Bacteria | Coxiella burnetii RSA 493_1                                     | 1817            |                 |              |                    |
| Bacteria | Cupriavidus taiwanensis_1                                       | 3135            |                 |              |                    |
| Bacteria | Cupriavidus taiwanensis_2                                       | 2242            |                 |              |                    |
| Bacteria | Cyanothece sp. ATCC 51142_1                                     | 4761            |                 |              |                    |
| Bacteria | Cyanothece sp. ATCC 51142_2                                     | 449             |                 |              |                    |
| Bacteria | Dehalococcoides ethenogenes 195_1                               | 1580            |                 |              |                    |
| Bacteria | Deinococcus radiodurans R1_1                                    | 2629            |                 |              |                    |

| Type      | Name                                                  | Number of genes | Baltimore class | Nucleic Acid | Monophyletic group |
|-----------|-------------------------------------------------------|-----------------|-----------------|--------------|--------------------|
| Bacteria  | Deinococcus radiodurans R1_2                          | 368             |                 |              |                    |
| Bacteria  | Dictyoglomus thermophilum H-6-12_1                    | 1912            |                 |              |                    |
| Bacteria  | Elusimicrobium minutum Pei191_1                       | 1529            |                 |              |                    |
| Bacteria  | Flavobacterium psychrophilum JIP02/86_1               | 2412            |                 |              |                    |
| Bacteria  | Fusobacterium nucleatum subsp. nucleatum ATCC 25586_1 | 2063            |                 |              |                    |
| Bacteria  | Gemmata obscuriglobus UQM 2246_1                      | 7989            |                 |              |                    |
| Bacteria  | Gemmatimonas aurantiaca T-27_1                        | 3935            |                 |              |                    |
| Bacteria  | Gloeobacter violaceus PCC 7421_1                      | 4430            |                 |              |                    |
| Bacteria  | Leptospira interrogans serovar Lai str. 56601_1       | 3409            |                 |              |                    |
| Bacteria  | Leptospira interrogans serovar Lai str. 56601_2       | 293             |                 |              |                    |
| Bacteria  | Magnetococcus sp. MC-1_1                              | 3716            |                 |              |                    |
| Bacteria  | Nostoc punctiforme PCC 73102_1                        | 6086            |                 |              |                    |
| Bacteria  | Opiritatus terrae PB90-1_1                            | 4612            |                 |              |                    |
| Bacteria  | Pedobacter heparinus DSM 2366_1                       | 4252            |                 |              |                    |
| Bacteria  | Pirellula staleyi DSM 6068_1                          | 4717            |                 |              |                    |
| Bacteria  | Prochlorococcus marinus str. AS9601_1                 | 1920            |                 |              |                    |
| Bacteria  | Psychrobacter arcticus 273-4_1                        | 2120            |                 |              |                    |
| Bacteria  | Rhizobium leguminosarum bv. trifolii WSM1325_1        | 4565            |                 |              |                    |
| Bacteria  | Rhodospirillum rubrum ATCC 11170_1                    | 3791            |                 |              |                    |
| Bacteria  | Rickettsia rickettsii str. Iowa_1                     | 1383            |                 |              |                    |
| Bacteria  | Shewanella putrefaciens CN-32_1                       | 3972            |                 |              |                    |
| Bacteria  | Solibacter usitatus Elin6076_1                        | 7826            |                 |              |                    |
| Bacteria  | Synechococcus elongatus PCC 6301_1                    | 2526            |                 |              |                    |
| Bacteria  | Thermanaerovibrio acidaminovorans DSM 6589_1          | 1738            |                 |              |                    |
| Bacteria  | Thermoanaerobacter tengcongensis MB4_1                | 2588            |                 |              |                    |
| Bacteria  | Thermobaculum terrenum ATCC BAA-798_1                 | 1859            |                 |              |                    |
| Bacteria  | Thermobaculum terrenum ATCC BAA-798_2                 | 973             |                 |              |                    |
| Bacteria  | Thermodesulfobivrio yellowstonii DSM 11347_1          | 2033            |                 |              |                    |
| Bacteria  | Thermomicrobium roseum DSM 5159_1                     | 1917            |                 |              |                    |
| Bacteria  | Thermotoga maritima MSB8_1                            | 1858            |                 |              |                    |
| Bacteria  | Thermus thermophilus HB8_1                            | 1972            |                 |              |                    |
| Eukaryota | Arabidopsis thaliana_1                                | 27225           |                 |              |                    |
| Eukaryota | Chlorella variabilis_1                                | 9780            |                 |              |                    |
| Eukaryota | Dictyostelium discoideum AX4                          | 13267           |                 |              |                    |
| Eukaryota | Dictyostelium purpureum                               | 12399           |                 |              |                    |
| Eukaryota | Encephalitozoon intestinalis ATCC 50506_1             | 1833            |                 |              |                    |
| Eukaryota | Entamoeba dispar SAW760                               | 8798            |                 |              |                    |
| Eukaryota | Entamoeba histolytica HM-1:IMSS                       | 8150            |                 |              |                    |
| Eukaryota | Giardia lamblia ATCC 50803_1                          | 7364            |                 |              |                    |
| Eukaryota | Homo sapiens_1                                        | 21973           |                 |              |                    |
| Eukaryota | Naegleria gruberi_1                                   | 15711           |                 |              |                    |
| Eukaryota | Phytophthora infestans T30-4_1                        | 17797           |                 |              |                    |
| Eukaryota | Plasmodium knowlesi strain H_1                        | 5102            |                 |              |                    |
| Eukaryota | Saccharomyces cerevisiae_10                           | 357             |                 |              |                    |
| Eukaryota | Saccharomyces cerevisiae_11                           | 312             |                 |              |                    |
| Eukaryota | Saccharomyces cerevisiae_12                           | 508             |                 |              |                    |
| Eukaryota | Saccharomyces cerevisiae_13                           | 460             |                 |              |                    |
| Eukaryota | Saccharomyces cerevisiae_14                           | 393             |                 |              |                    |
| Eukaryota | Saccharomyces cerevisiae_15                           | 536             |                 |              |                    |
| Eukaryota | Saccharomyces cerevisiae_16                           | 464             |                 |              |                    |
| Eukaryota | Saccharomyces cerevisiae_2                            | 406             |                 |              |                    |
| Eukaryota | Saccharomyces cerevisiae_3                            | 160             |                 |              |                    |
| Eukaryota | Saccharomyces cerevisiae_4                            | 755             |                 |              |                    |
| Eukaryota | Saccharomyces cerevisiae_5                            | 276             |                 |              |                    |
| Eukaryota | Saccharomyces cerevisiae_6                            | 126             |                 |              |                    |
| Eukaryota | Saccharomyces cerevisiae_7                            | 526             |                 |              |                    |
| Eukaryota | Saccharomyces cerevisiae_8                            | 281             |                 |              |                    |
| Eukaryota | Saccharomyces cerevisiae_9                            | 207             |                 |              |                    |
| Eukaryota | Tetrahymena thermophila SB210_1                       | 24725           |                 |              |                    |
| Eukaryota | Trypanosoma cruzi_1                                   | 19607           |                 |              |                    |
| Plasmid   | 'Nostoc azollae' 0708_1                               | 51              |                 |              |                    |
| Plasmid   | 'Nostoc azollae' 0708_2                               | 11              |                 |              |                    |
| Plasmid   | Acaryochloris marina MBIC11017_1                      | 382             |                 |              |                    |
| Plasmid   | Acaryochloris marina MBIC11017_2                      | 408             |                 |              |                    |
| Plasmid   | Acaryochloris marina MBIC11017_3                      | 362             |                 |              |                    |
| Plasmid   | Acaryochloris marina MBIC11017_4                      | 273             |                 |              |                    |
| Plasmid   | Acaryochloris marina MBIC11017_5                      | 222             |                 |              |                    |
| Plasmid   | Acaryochloris marina MBIC11017_6                      | 188             |                 |              |                    |
| Plasmid   | Acaryochloris marina MBIC11017_7                      | 173             |                 |              |                    |
| Plasmid   | Acaryochloris marina MBIC11017_8                      | 117             |                 |              |                    |
| Plasmid   | Acaryochloris marina MBIC11017_9                      | 4               |                 |              |                    |
| Plasmid   | Acetobacter pasteurianus IFO 3283-01_1                | 177             |                 |              |                    |
| Plasmid   | Acetobacter pasteurianus IFO 3283-01_2                | 174             |                 |              |                    |
| Plasmid   | Acetobacter pasteurianus IFO 3283-01_3                | 63              |                 |              |                    |
| Plasmid   | Acetobacter pasteurianus IFO 3283-01_4                | 3               |                 |              |                    |
| Plasmid   | Acetobacter pasteurianus IFO 3283-01_5                | 2               |                 |              |                    |
| Plasmid   | Acetobacter pasteurianus IFO 3283-01_6                | 2               |                 |              |                    |
| Plasmid   | Achromobacter xylosoxidans A8_1                       | 104             |                 |              |                    |
| Plasmid   | Achromobacter xylosoxidans A8_2                       | 252             |                 |              |                    |

| Type    | Name                                                            | Number of genes | Baltimore class | Nucleic Acid | Monophyletic group |
|---------|-----------------------------------------------------------------|-----------------|-----------------|--------------|--------------------|
| Plasmid | Acidiphilium cryptum JF-5_1                                     | 171             |                 |              |                    |
| Plasmid | Acidiphilium cryptum JF-5_2                                     | 169             |                 |              |                    |
| Plasmid | Acidiphilium cryptum JF-5_3                                     | 77              |                 |              |                    |
| Plasmid | Acidiphilium cryptum JF-5_4                                     | 32              |                 |              |                    |
| Plasmid | Acidiphilium cryptum JF-5_5                                     | 28              |                 |              |                    |
| Plasmid | Acidiphilium cryptum JF-5_6                                     | 9               |                 |              |                    |
| Plasmid | Acidiphilium cryptum JF-5_7                                     | 5               |                 |              |                    |
| Plasmid | Acidiphilium cryptum JF-5_8                                     | 5               |                 |              |                    |
| Plasmid | Acidiphilium multivorum AIU301_1                                | 284             |                 |              |                    |
| Plasmid | Acidiphilium multivorum AIU301_2                                | 61              |                 |              |                    |
| Plasmid | Acidiphilium multivorum AIU301_3                                | 19              |                 |              |                    |
| Plasmid | Acidiphilium multivorum AIU301_4                                | 14              |                 |              |                    |
| Plasmid | Acidiphilium multivorum AIU301_5                                | 1               |                 |              |                    |
| Plasmid | Acidiphilium multivorum AIU301_6                                | 69              |                 |              |                    |
| Plasmid | Acidiphilium multivorum AIU301_7                                | 44              |                 |              |                    |
| Plasmid | Acidiphilium multivorum AIU301_8                                | 8               |                 |              |                    |
| Plasmid | Acidobacterium sp. MP5ACTX9_1                                   | 286             |                 |              |                    |
| Plasmid | Acidobacterium sp. MP5ACTX9_2                                   | 166             |                 |              |                    |
| Plasmid | Acidobacterium sp. MP5ACTX9_3                                   | 91              |                 |              |                    |
| Plasmid | Acidobacterium sp. MP5ACTX9_4                                   | 110             |                 |              |                    |
| Plasmid | Acidobacterium sp. MP5ACTX9_5                                   | 191             |                 |              |                    |
| Plasmid | Acidovorax sp. JS42_1                                           | 84              |                 |              |                    |
| Plasmid | Acidovorax sp. JS42_2                                           | 64              |                 |              |                    |
| Plasmid | Acinetobacter baumannii AB0057_1                                | 11              |                 |              |                    |
| Plasmid | Acinetobacter baumannii ACICU_1                                 | 28              |                 |              |                    |
| Plasmid | Acinetobacter baumannii ACICU_2                                 | 64              |                 |              |                    |
| Plasmid | Acinetobacter baumannii ATCC 17978_1                            | 11              |                 |              |                    |
| Plasmid | Acinetobacter baumannii ATCC 17978_2                            | 5               |                 |              |                    |
| Plasmid | Acinetobacter baumannii AYE_1                                   | 7               |                 |              |                    |
| Plasmid | Acinetobacter baumannii AYE_2                                   | 11              |                 |              |                    |
| Plasmid | Acinetobacter baumannii AYE_3                                   | 5               |                 |              |                    |
| Plasmid | Acinetobacter baumannii AYE_4                                   | 82              |                 |              |                    |
| Plasmid | Acinetobacter baumannii SDF_1                                   | 8               |                 |              |                    |
| Plasmid | Acinetobacter baumannii SDF_2                                   | 30              |                 |              |                    |
| Plasmid | Acinetobacter baumannii SDF_3                                   | 24              |                 |              |                    |
| Plasmid | Actinobacillus pleuropneumoniae serovar 7 str. AP76_1           | 2               |                 |              |                    |
| Plasmid | Actinobacillus pleuropneumoniae serovar 7 str. AP76_2           | 4               |                 |              |                    |
| Plasmid | Actinobacillus pleuropneumoniae serovar 7 str. AP76_3           | 5               |                 |              |                    |
| Plasmid | Aeromonas salmonicida subsp. salmonicida A449_1                 | 8               |                 |              |                    |
| Plasmid | Aeromonas salmonicida subsp. salmonicida A449_2                 | 9               |                 |              |                    |
| Plasmid | Aeromonas salmonicida subsp. salmonicida A449_3                 | 7               |                 |              |                    |
| Plasmid | Aeromonas salmonicida subsp. salmonicida A449_4                 | 173             |                 |              |                    |
| Plasmid | Aeromonas salmonicida subsp. salmonicida A449_5                 | 154             |                 |              |                    |
| Plasmid | Aggregatibacter actinomycetemcomitans D11S-1_1                  | 41              |                 |              |                    |
| Plasmid | Aggregatibacter actinomycetemcomitans_1                         | 43              |                 |              |                    |
| Plasmid | Agrobacterium radiobacter K84_1                                 | 366             |                 |              |                    |
| Plasmid | Agrobacterium radiobacter K84_2                                 | 176             |                 |              |                    |
| Plasmid | Agrobacterium radiobacter K84_3                                 | 35              |                 |              |                    |
| Plasmid | Agrobacterium sp. H13-3_1                                       | 651             |                 |              |                    |
| Plasmid | Agrobacterium tumefaciens str. C58_1                            | 542             |                 |              |                    |
| Plasmid | Agrobacterium tumefaciens str. C58_2                            | 197             |                 |              |                    |
| Plasmid | Agrobacterium vitis S4_1                                        | 529             |                 |              |                    |
| Plasmid | Agrobacterium vitis S4_2                                        | 205             |                 |              |                    |
| Plasmid | Agrobacterium vitis S4_3                                        | 178             |                 |              |                    |
| Plasmid | Agrobacterium vitis S4_4                                        | 82              |                 |              |                    |
| Plasmid | Agrobacterium vitis S4_5                                        | 107             |                 |              |                    |
| Plasmid | Alicyclophilus denitrificans BC_1                               | 125             |                 |              |                    |
| Plasmid | Alicyclophilus denitrificans BC_2                               | 87              |                 |              |                    |
| Plasmid | Alicyclophilus denitrificans K601_1                             | 89              |                 |              |                    |
| Plasmid | Alicyclobacillus acidocaldarius subsp. acidocaldarius DSM 446_1 | 98              |                 |              |                    |
| Plasmid | Alicyclobacillus acidocaldarius subsp. acidocaldarius DSM 446_2 | 92              |                 |              |                    |
| Plasmid | Alicyclobacillus acidocaldarius subsp. acidocaldarius DSM 446_3 | 6               |                 |              |                    |
| Plasmid | Aliivibrio salmonicida LF11238_1                                | 72              |                 |              |                    |
| Plasmid | Aliivibrio salmonicida LF11238_2                                | 29              |                 |              |                    |
| Plasmid | Aliivibrio salmonicida LF11238_3                                | 3               |                 |              |                    |
| Plasmid | Aliivibrio salmonicida LF11238_4                                | 3               |                 |              |                    |
| Plasmid | Allochroamatium vinosum DSM 180_1                               | 119             |                 |              |                    |
| Plasmid | Allochroamatium vinosum DSM 180_2                               | 48              |                 |              |                    |
| Plasmid | Ammonifex degensii KC4_1                                        | 28              |                 |              |                    |
| Plasmid | Amycolicococcus subflavus DQS3-9A1_1                            | 27              |                 |              |                    |
| Plasmid | Amycolicococcus subflavus DQS3-9A1_2                            | 121             |                 |              |                    |
| Plasmid | Anabaena variabilis ATCC 29413_1                                | 344             |                 |              |                    |
| Plasmid | Anabaena variabilis ATCC 29413_2                                | 31              |                 |              |                    |
| Plasmid | Anabaena variabilis ATCC 29413_3                                | 243             |                 |              |                    |
| Plasmid | Anaerococcus prevotii DSM 20548_1                               | 104             |                 |              |                    |
| Plasmid | Aquifex aeolicus VF5_1                                          | 31              |                 |              |                    |
| Plasmid | Archaeoglobus profundus DSM 5631_1                              | 4               |                 |              |                    |
| Plasmid | Arthrobacter arilaitensis Re117_1                               | 13              |                 |              |                    |
| Plasmid | Arthrobacter arilaitensis Re117_2                               | 47              |                 |              |                    |
| Plasmid | Arthrobacter aurescens TC1_1                                    | 292             |                 |              |                    |

| Type    | Name                                                  | Number of genes | Baltimore class | Nucleic Acid | Monophyletic group |
|---------|-------------------------------------------------------|-----------------|-----------------|--------------|--------------------|
| Plasmid | Arthrobacter aureus TC1_2                             | 254             |                 |              |                    |
| Plasmid | Arthrobacter chlorophenicus A6_1                      | 554             |                 |              |                    |
| Plasmid | Arthrobacter chlorophenicus A6_2                      | 151             |                 |              |                    |
| Plasmid | Arthrobacter phenanthrenivorans Sphe3_1               | 189             |                 |              |                    |
| Plasmid | Arthrobacter phenanthrenivorans Sphe3_2               | 99              |                 |              |                    |
| Plasmid | Arthrobacter sp. FB24_1                               | 158             |                 |              |                    |
| Plasmid | Arthrobacter sp. FB24_2                               | 110             |                 |              |                    |
| Plasmid | Arthrobacter sp. FB24_3                               | 96              |                 |              |                    |
| Plasmid | Aster yellows witches'-broom phytoplasma AYWB_1       | 5               |                 |              |                    |
| Plasmid | Aster yellows witches'-broom phytoplasma AYWB_2       | 4               |                 |              |                    |
| Plasmid | Aster yellows witches'-broom phytoplasma AYWB_3       | 7               |                 |              |                    |
| Plasmid | Aster yellows witches'-broom phytoplasma AYWB_4       | 6               |                 |              |                    |
| Plasmid | Asticcacaulis excentricus CB 48_1                     | 172             |                 |              |                    |
| Plasmid | Asticcacaulis excentricus CB 48_2                     | 140             |                 |              |                    |
| Plasmid | Azoarcus sp. Ebn1_1                                   | 272             |                 |              |                    |
| Plasmid | Azoarcus sp. Ebn1_2                                   | 194             |                 |              |                    |
| Plasmid | Azospirillum sp. B510_1                               | 1131            |                 |              |                    |
| Plasmid | Azospirillum sp. B510_2                               | 631             |                 |              |                    |
| Plasmid | Azospirillum sp. B510_3                               | 533             |                 |              |                    |
| Plasmid | Azospirillum sp. B510_4                               | 519             |                 |              |                    |
| Plasmid | Azospirillum sp. B510_5                               | 415             |                 |              |                    |
| Plasmid | Azospirillum sp. B510_6                               | 187             |                 |              |                    |
| Plasmid | Bacillus anthracis CI_1                               | 210             |                 |              |                    |
| Plasmid | Bacillus anthracis CI_2                               | 109             |                 |              |                    |
| Plasmid | Bacillus anthracis CI_3                               | 18              |                 |              |                    |
| Plasmid | Bacillus anthracis str. 'Ames Ancestor'_1             | 178             |                 |              |                    |
| Plasmid | Bacillus anthracis str. 'Ames Ancestor'_2             | 98              |                 |              |                    |
| Plasmid | Bacillus anthracis str. A0248_1                       | 89              |                 |              |                    |
| Plasmid | Bacillus anthracis str. A0248_2                       | 162             |                 |              |                    |
| Plasmid | Bacillus anthracis str. CDC 684_1                     | 117             |                 |              |                    |
| Plasmid | Bacillus anthracis str. CDC 684_2                     | 206             |                 |              |                    |
| Plasmid | Bacillus cereus 03BB102_1                             | 208             |                 |              |                    |
| Plasmid | Bacillus cereus AH187_1                               | 22              |                 |              |                    |
| Plasmid | Bacillus cereus AH187_2                               | 273             |                 |              |                    |
| Plasmid | Bacillus cereus AH187_3                               | 59              |                 |              |                    |
| Plasmid | Bacillus cereus AH187_4                               | 5               |                 |              |                    |
| Plasmid | Bacillus cereus AH820_1                               | 11              |                 |              |                    |
| Plasmid | Bacillus cereus AH820_2                               | 5               |                 |              |                    |
| Plasmid | Bacillus cereus AH820_3                               | 320             |                 |              |                    |
| Plasmid | Bacillus cereus ATCC 10987_1                          | 241             |                 |              |                    |
| Plasmid | Bacillus cereus ATCC 14579_1                          | 21              |                 |              |                    |
| Plasmid | Bacillus cereus E33L_1                                | 430             |                 |              |                    |
| Plasmid | Bacillus cereus E33L_2                                | 5               |                 |              |                    |
| Plasmid | Bacillus cereus E33L_3                                | 54              |                 |              |                    |
| Plasmid | Bacillus cereus E33L_4                                | 8               |                 |              |                    |
| Plasmid | Bacillus cereus E33L_5                                | 10              |                 |              |                    |
| Plasmid | Bacillus cereus G9842_1                               | 118             |                 |              |                    |
| Plasmid | Bacillus cereus G9842_2                               | 251             |                 |              |                    |
| Plasmid | Bacillus cereus Q1_1                                  | 69              |                 |              |                    |
| Plasmid | Bacillus cereus Q1_2                                  | 228             |                 |              |                    |
| Plasmid | Bacillus cereus subsp. cytotoxis NVH 391-98_1         | 11              |                 |              |                    |
| Plasmid | Bacillus megaterium QM B1551_1                        | 60              |                 |              |                    |
| Plasmid | Bacillus megaterium QM B1551_2                        | 8               |                 |              |                    |
| Plasmid | Bacillus megaterium QM B1551_3                        | 13              |                 |              |                    |
| Plasmid | Bacillus megaterium QM B1551_4                        | 38              |                 |              |                    |
| Plasmid | Bacillus megaterium QM B1551_5                        | 174             |                 |              |                    |
| Plasmid | Bacillus megaterium QM B1551_6                        | 94              |                 |              |                    |
| Plasmid | Bacillus megaterium QM B1551_7                        | 109             |                 |              |                    |
| Plasmid | Bacillus pseudofirmus OF4_1                           | 292             |                 |              |                    |
| Plasmid | Bacillus pseudofirmus OF4_2                           | 122             |                 |              |                    |
| Plasmid | Bacillus thuringiensis BMB171_1                       | 271             |                 |              |                    |
| Plasmid | Bacillus thuringiensis serovar konkukian str. 97-27_1 | 80              |                 |              |                    |
| Plasmid | Bacillus thuringiensis str. Al Hakam_1                | 62              |                 |              |                    |
| Plasmid | Bacillus weihenstephanensis KBAB4_1                   | 289             |                 |              |                    |
| Plasmid | Bacillus weihenstephanensis KBAB4_2                   | 63              |                 |              |                    |
| Plasmid | Bacillus weihenstephanensis KBAB4_3                   | 75              |                 |              |                    |
| Plasmid | Bacillus weihenstephanensis KBAB4_4                   | 71              |                 |              |                    |
| Plasmid | Bacteroides fragilis NCTC 9343_1                      | 47              |                 |              |                    |
| Plasmid | Bacteroides fragilis YCH46_1                          | 47              |                 |              |                    |
| Plasmid | Bacteroides salanitronis DSM 18170_1                  | 56              |                 |              |                    |
| Plasmid | Bacteroides salanitronis DSM 18170_2                  | 8               |                 |              |                    |
| Plasmid | Bacteroides salanitronis DSM 18170_3                  | 24              |                 |              |                    |
| Plasmid | Bacteroides thetaiotaomicron VPI-5482_1               | 38              |                 |              |                    |
| Plasmid | Bartonella grahamii as4aup_1                          | 31              |                 |              |                    |
| Plasmid | Bartonella tribocorum CIP 105476_1                    | 18              |                 |              |                    |
| Plasmid | Beijerinckia indica subsp. indica ATCC 9039_1         | 39              |                 |              |                    |
| Plasmid | Beijerinckia indica subsp. indica ATCC 9039_2         | 176             |                 |              |                    |
| Plasmid | Bifidobacterium longum DJO10A_1                       | 10              |                 |              |                    |
| Plasmid | Bifidobacterium longum DJO10A_2                       | 3               |                 |              |                    |
| Plasmid | Bifidobacterium longum NCC2705_1                      | 2               |                 |              |                    |

| Type    | Name                                                     | Number of genes | Baltimore class | Nucleic Acid | Monophyletic group |
|---------|----------------------------------------------------------|-----------------|-----------------|--------------|--------------------|
| Plasmid | Bifidobacterium longum subsp. infantis 157F_1            | 5               |                 |              |                    |
| Plasmid | Bifidobacterium longum subsp. infantis 157F_2            | 3               |                 |              |                    |
| Plasmid | Blattabacterium sp. (Periplaneta americana) str. BPLAN_1 | 4               |                 |              |                    |
| Plasmid | Borrelia afzelii PKo_1                                   | 43              |                 |              |                    |
| Plasmid | Borrelia afzelii PKo_2                                   | 28              |                 |              |                    |
| Plasmid | Borrelia afzelii PKo_3                                   | 75              |                 |              |                    |
| Plasmid | Borrelia afzelii PKo_4                                   | 59              |                 |              |                    |
| Plasmid | Borrelia afzelii PKo_5                                   | 36              |                 |              |                    |
| Plasmid | Borrelia afzelii PKo_6                                   | 55              |                 |              |                    |
| Plasmid | Borrelia afzelii PKo_7                                   | 34              |                 |              |                    |
| Plasmid | Borrelia afzelii PKo_8                                   | 29              |                 |              |                    |
| Plasmid | Borrelia burgdorferi B31_1                               | 42              |                 |              |                    |
| Plasmid | Borrelia burgdorferi B31_10                              | 6               |                 |              |                    |
| Plasmid | Borrelia burgdorferi B31_11                              | 23              |                 |              |                    |
| Plasmid | Borrelia burgdorferi B31_12                              | 29              |                 |              |                    |
| Plasmid | Borrelia burgdorferi B31_13                              | 26              |                 |              |                    |
| Plasmid | Borrelia burgdorferi B31_14                              | 32              |                 |              |                    |
| Plasmid | Borrelia burgdorferi B31_15                              | 37              |                 |              |                    |
| Plasmid | Borrelia burgdorferi B31_16                              | 43              |                 |              |                    |
| Plasmid | Borrelia burgdorferi B31_17                              | 51              |                 |              |                    |
| Plasmid | Borrelia burgdorferi B31_18                              | 48              |                 |              |                    |
| Plasmid | Borrelia burgdorferi B31_19                              | 76              |                 |              |                    |
| Plasmid | Borrelia burgdorferi B31_2                               | 45              |                 |              |                    |
| Plasmid | Borrelia burgdorferi B31_20                              | 29              |                 |              |                    |
| Plasmid | Borrelia burgdorferi B31_21                              | 11              |                 |              |                    |
| Plasmid | Borrelia burgdorferi B31_3                               | 44              |                 |              |                    |
| Plasmid | Borrelia burgdorferi B31_4                               | 42              |                 |              |                    |
| Plasmid | Borrelia burgdorferi B31_5                               | 44              |                 |              |                    |
| Plasmid | Borrelia burgdorferi B31_6                               | 43              |                 |              |                    |
| Plasmid | Borrelia burgdorferi B31_7                               | 35              |                 |              |                    |
| Plasmid | Borrelia burgdorferi B31_8                               | 11              |                 |              |                    |
| Plasmid | Borrelia burgdorferi B31_9                               | 72              |                 |              |                    |
| Plasmid | Borrelia burgdorferi ZS7_1                               | 60              |                 |              |                    |
| Plasmid | Borrelia burgdorferi ZS7_10                              | 22              |                 |              |                    |
| Plasmid | Borrelia burgdorferi ZS7_11                              | 14              |                 |              |                    |
| Plasmid | Borrelia burgdorferi ZS7_12                              | 17              |                 |              |                    |
| Plasmid | Borrelia burgdorferi ZS7_13                              | 55              |                 |              |                    |
| Plasmid | Borrelia burgdorferi ZS7_14                              | 21              |                 |              |                    |
| Plasmid | Borrelia burgdorferi ZS7_2                               | 35              |                 |              |                    |
| Plasmid | Borrelia burgdorferi ZS7_3                               | 25              |                 |              |                    |
| Plasmid | Borrelia burgdorferi ZS7_4                               | 36              |                 |              |                    |
| Plasmid | Borrelia burgdorferi ZS7_5                               | 39              |                 |              |                    |
| Plasmid | Borrelia burgdorferi ZS7_6                               | 40              |                 |              |                    |
| Plasmid | Borrelia burgdorferi ZS7_7                               | 23              |                 |              |                    |
| Plasmid | Borrelia burgdorferi ZS7_8                               | 31              |                 |              |                    |
| Plasmid | Borrelia burgdorferi ZS7_9                               | 13              |                 |              |                    |
| Plasmid | Borrelia duttonii Ly_1                                   | 8               |                 |              |                    |
| Plasmid | Borrelia duttonii Ly_10                                  | 45              |                 |              |                    |
| Plasmid | Borrelia duttonii Ly_11                                  | 21              |                 |              |                    |
| Plasmid | Borrelia duttonii Ly_12                                  | 12              |                 |              |                    |
| Plasmid | Borrelia duttonii Ly_13                                  | 34              |                 |              |                    |
| Plasmid | Borrelia duttonii Ly_14                                  | 20              |                 |              |                    |
| Plasmid | Borrelia duttonii Ly_15                                  | 22              |                 |              |                    |
| Plasmid | Borrelia duttonii Ly_16                                  | 35              |                 |              |                    |
| Plasmid | Borrelia duttonii Ly_2                                   | 13              |                 |              |                    |
| Plasmid | Borrelia duttonii Ly_3                                   | 36              |                 |              |                    |
| Plasmid | Borrelia duttonii Ly_4                                   | 134             |                 |              |                    |
| Plasmid | Borrelia duttonii Ly_5                                   | 19              |                 |              |                    |
| Plasmid | Borrelia duttonii Ly_6                                   | 20              |                 |              |                    |
| Plasmid | Borrelia duttonii Ly_7                                   | 18              |                 |              |                    |
| Plasmid | Borrelia duttonii Ly_8                                   | 28              |                 |              |                    |
| Plasmid | Borrelia duttonii Ly_9                                   | 20              |                 |              |                    |
| Plasmid | Borrelia garinii PBi_1                                   | 26              |                 |              |                    |
| Plasmid | Borrelia garinii PBi_2                                   | 74              |                 |              |                    |
| Plasmid | Borrelia garinii PBi_3                                   | 338             |                 |              |                    |
| Plasmid | Borrelia recurrentis A1_1                                | 91              |                 |              |                    |
| Plasmid | Borrelia recurrentis A1_2                                | 17              |                 |              |                    |
| Plasmid | Borrelia recurrentis A1_3                                | 17              |                 |              |                    |
| Plasmid | Borrelia recurrentis A1_4                                | 15              |                 |              |                    |
| Plasmid | Borrelia recurrentis A1_5                                | 19              |                 |              |                    |
| Plasmid | Borrelia recurrentis A1_6                                | 28              |                 |              |                    |
| Plasmid | Borrelia recurrentis A1_7                                | 3               |                 |              |                    |
| Plasmid | Brachyspira hyodysenteriae WA1_1                         | 31              |                 |              |                    |
| Plasmid | Bradyrhizobium sp. BTAi1_1                               | 228             |                 |              |                    |
| Plasmid | Buchnera aphidicola (Cinara cedri)_1                     | 5               |                 |              |                    |
| Plasmid | Buchnera aphidicola str. APS (Acyrthosiphon pisum)_1     | 3               |                 |              |                    |
| Plasmid | Buchnera aphidicola str. APS (Acyrthosiphon pisum)_2     | 7               |                 |              |                    |
| Plasmid | Buchnera aphidicola str. Bp (Baizongia pistaciae)_1      | 3               |                 |              |                    |
| Plasmid | Burkholderia ambifaria AMMD_1                            | 45              |                 |              |                    |
| Plasmid | Burkholderia ambifaria MC40-6_1                          | 274             |                 |              |                    |

| Type    | Name                                                           | Number of genes | Baltimore class | Nucleic Acid | Monophyletic group |
|---------|----------------------------------------------------------------|-----------------|-----------------|--------------|--------------------|
| Plasmid | Burkholderia cenocepacia HI2424_1                              | 156             |                 |              |                    |
| Plasmid | Burkholderia cenocepacia J2315_1                               | 93              |                 |              |                    |
| Plasmid | Burkholderia gladioli BSR3_1                                   | 104             |                 |              |                    |
| Plasmid | Burkholderia gladioli BSR3_2                                   | 94              |                 |              |                    |
| Plasmid | Burkholderia gladioli BSR3_3                                   | 189             |                 |              |                    |
| Plasmid | Burkholderia gladioli BSR3_4                                   | 319             |                 |              |                    |
| Plasmid | Burkholderia glumae BGR1_1                                     | 97              |                 |              |                    |
| Plasmid | Burkholderia glumae BGR1_2                                     | 106             |                 |              |                    |
| Plasmid | Burkholderia glumae BGR1_3                                     | 102             |                 |              |                    |
| Plasmid | Burkholderia glumae BGR1_4                                     | 102             |                 |              |                    |
| Plasmid | Burkholderia multivorans ATCC 17616_1                          | 138             |                 |              |                    |
| Plasmid | Burkholderia multivorans ATCC 17616_2                          | 131             |                 |              |                    |
| Plasmid | Burkholderia phymatum STM815_1                                 | 1626            |                 |              |                    |
| Plasmid | Burkholderia phymatum STM815_2                                 | 449             |                 |              |                    |
| Plasmid | Burkholderia phytofirmans PsJN_1                               | 167             |                 |              |                    |
| Plasmid | Burkholderia rhizoxinica HKI 454_1                             | 203             |                 |              |                    |
| Plasmid | Burkholderia sp. CCGE1002_1                                    | 406             |                 |              |                    |
| Plasmid | Burkholderia vietnamiensis G4_1                                | 111             |                 |              |                    |
| Plasmid | Burkholderia vietnamiensis G4_2                                | 263             |                 |              |                    |
| Plasmid | Burkholderia vietnamiensis G4_3                                | 107             |                 |              |                    |
| Plasmid | Burkholderia vietnamiensis G4_4                                | 249             |                 |              |                    |
| Plasmid | Burkholderia vietnamiensis G4_5                                | 403             |                 |              |                    |
| Plasmid | Butyrivibrio proteoclasticus B316_1                            | 424             |                 |              |                    |
| Plasmid | Butyrivibrio proteoclasticus B316_2                            | 198             |                 |              |                    |
| Plasmid | Caldicellulosiruptor bescii DSM 6725_1                         | 8               |                 |              |                    |
| Plasmid | Caldicellulosiruptor bescii DSM 6725_2                         | 4               |                 |              |                    |
| Plasmid | Caldicellulosiruptor kristjanssonii 177R1B_1                   | 17              |                 |              |                    |
| Plasmid | Calditerrivibrio nitroreducens DSM 19672_1                     | 55              |                 |              |                    |
| Plasmid | Campylobacter concisus 13826_1                                 | 33              |                 |              |                    |
| Plasmid | Campylobacter concisus 13826_2                                 | 23              |                 |              |                    |
| Plasmid | Campylobacter hominis ATCC BAA-381_1                           | 5               |                 |              |                    |
| Plasmid | Campylobacter jejuni subsp. jejuni 81-176_1                    | 53              |                 |              |                    |
| Plasmid | Campylobacter jejuni subsp. jejuni 81-176_2                    | 52              |                 |              |                    |
| Plasmid | Campylobacter jejuni subsp. jejuni ICDCCJ07001_1               | 37              |                 |              |                    |
| Plasmid | Campylobacter lari RM2100_1                                    | 42              |                 |              |                    |
| Plasmid | Candidatus Accumulibacter phosphatis clade IIA str. UW-1_1     | 40              |                 |              |                    |
| Plasmid | Candidatus Accumulibacter phosphatis clade IIA str. UW-1_2     | 40              |                 |              |                    |
| Plasmid | Candidatus Accumulibacter phosphatis clade IIA str. UW-1_3     | 156             |                 |              |                    |
| Plasmid | Candidatus Azobacteroides pseudotriconymphae genomovar. CFP2_1 | 28              |                 |              |                    |
| Plasmid | Candidatus Azobacteroides pseudotriconymphae genomovar. CFP2_2 | 25              |                 |              |                    |
| Plasmid | Candidatus Azobacteroides pseudotriconymphae genomovar. CFP2_3 | 4               |                 |              |                    |
| Plasmid | Candidatus Azobacteroides pseudotriconymphae genomovar. CFP2_4 | 37              |                 |              |                    |
| Plasmid | Candidatus Hamiltonella defensa 5AT (Acyrtosiphon pisum)_1     | 54              |                 |              |                    |
| Plasmid | Candidatus Riesia pediculicola USDA_1                          | 12              |                 |              |                    |
| Plasmid | Carnobacterium sp. 17-4_1                                      | 54              |                 |              |                    |
| Plasmid | Caulobacter sp. K31_1                                          | 165             |                 |              |                    |
| Plasmid | Caulobacter sp. K31_2                                          | 212             |                 |              |                    |
| Plasmid | Chlamydia muridarum Nigg_1                                     | 7               |                 |              |                    |
| Plasmid | Chlamydia trachomatis A/HAR-13_1                               | 8               |                 |              |                    |
| Plasmid | Chlamydophila caviae GPIC_1                                    | 7               |                 |              |                    |
| Plasmid | Chlamydophila felis Fe/C-56_1                                  | 8               |                 |              |                    |
| Plasmid | Chlamydophila psittaci 6BC_1                                   | 8               |                 |              |                    |
| Plasmid | Citrobacter koseri ATCC BAA-895_1                              | 15              |                 |              |                    |
| Plasmid | Citrobacter koseri ATCC BAA-895_2                              | 13              |                 |              |                    |
| Plasmid | Citrobacter rodentium ICC168_1                                 | 55              |                 |              |                    |
| Plasmid | Citrobacter rodentium ICC168_2                                 | 55              |                 |              |                    |
| Plasmid | Citrobacter rodentium ICC168_3                                 | 3               |                 |              |                    |
| Plasmid | Clavibacter michiganensis subsp. michiganensis NCPPB 382_1     | 28              |                 |              |                    |
| Plasmid | Clavibacter michiganensis subsp. michiganensis NCPPB 382_2     | 67              |                 |              |                    |
| Plasmid | Clavibacter michiganensis subsp. sepedonicus_1                 | 64              |                 |              |                    |
| Plasmid | Clavibacter michiganensis subsp. sepedonicus_2                 | 112             |                 |              |                    |
| Plasmid | Clostridium acetobutylicum ATCC 824_1                          | 176             |                 |              |                    |
| Plasmid | Clostridium botulinum A str. ATCC 3502_1                       | 18              |                 |              |                    |
| Plasmid | Clostridium botulinum A3 str. Loch Maree_1                     | 329             |                 |              |                    |
| Plasmid | Clostridium botulinum B str. Eklund 17B_1                      | 50              |                 |              |                    |
| Plasmid | Clostridium botulinum B1 str. Okra_1                           | 194             |                 |              |                    |
| Plasmid | Clostridium botulinum Ba4 str. 657_1                           | 306             |                 |              |                    |
| Plasmid | Clostridium botulinum Ba4 str. 657_2                           | 6               |                 |              |                    |
| Plasmid | Clostridium botulinum BKT015925_1                              | 221             |                 |              |                    |
| Plasmid | Clostridium botulinum BKT015925_2                              | 86              |                 |              |                    |
| Plasmid | Clostridium botulinum BKT015925_3                              | 13              |                 |              |                    |
| Plasmid | Clostridium botulinum BKT015925_4                              | 103             |                 |              |                    |
| Plasmid | Clostridium botulinum BKT015925_5                              | 53              |                 |              |                    |
| Plasmid | Clostridium botulinum F str. Langeland_1                       | 24              |                 |              |                    |
| Plasmid | Clostridium difficile 630_1                                    | 11              |                 |              |                    |
| Plasmid | Clostridium kluyveri DSM 555_1                                 | 75              |                 |              |                    |
| Plasmid | Clostridium kluyveri NBRC 12016_1                              | 55              |                 |              |                    |
| Plasmid | Clostridium perfringens str. 13_1                              | 63              |                 |              |                    |
| Plasmid | Clostridium tetani E88_1                                       | 59              |                 |              |                    |
| Plasmid | Comamonas testosteroni CNB-1_1                                 | 92              |                 |              |                    |

| Type    | Name                                             | Number of genes | Baltimore class | Nucleic Acid | Monophyletic group |
|---------|--------------------------------------------------|-----------------|-----------------|--------------|--------------------|
| Plasmid | Corynebacterium aurimucosum ATCC 700975_1        | 20              |                 |              |                    |
| Plasmid | Corynebacterium efficiens YS-314_1               | 15              |                 |              |                    |
| Plasmid | Corynebacterium efficiens YS-314_2               | 41              |                 |              |                    |
| Plasmid | Corynebacterium glutamicum R_1                   | 28              |                 |              |                    |
| Plasmid | Corynebacterium jeikeium K411_1                  | 16              |                 |              |                    |
| Plasmid | Coxiella burnetii CbuK_Q154_1                    | 42              |                 |              |                    |
| Plasmid | Coxiella burnetii Dugway 5J108-111_1             | 52              |                 |              |                    |
| Plasmid | Coxiella burnetii RSA 331_1                      | 45              |                 |              |                    |
| Plasmid | Coxiella burnetii RSA 493_1                      | 30              |                 |              |                    |
| Plasmid | Cronobacter sakazakii ATCC BAA-894_1             | 38              |                 |              |                    |
| Plasmid | Cronobacter sakazakii ATCC BAA-894_2             | 127             |                 |              |                    |
| Plasmid | Cronobacter turicensis z3032_1                   | 136             |                 |              |                    |
| Plasmid | Cronobacter turicensis z3032_2                   | 32              |                 |              |                    |
| Plasmid | Cronobacter turicensis z3032_3                   | 74              |                 |              |                    |
| Plasmid | Cupriavidus metallidurans CH34_1                 | 200             |                 |              |                    |
| Plasmid | Cupriavidus metallidurans CH34_2                 | 165             |                 |              |                    |
| Plasmid | Cupriavidus metallidurans CH34_3                 | 2386            |                 |              |                    |
| Plasmid | Cupriavidus taiwanensis_1                        | 519             |                 |              |                    |
| Plasmid | Cyanothece sp. ATCC 51142_1                      | 38              |                 |              |                    |
| Plasmid | Cyanothece sp. ATCC 51142_2                      | 25              |                 |              |                    |
| Plasmid | Cyanothece sp. ATCC 51142_3                      | 19              |                 |              |                    |
| Plasmid | Cyanothece sp. ATCC 51142_4                      | 11              |                 |              |                    |
| Plasmid | Cyanothece sp. PCC 7424_1                        | 26              |                 |              |                    |
| Plasmid | Cyanothece sp. PCC 7424_2                        | 19              |                 |              |                    |
| Plasmid | Cyanothece sp. PCC 7424_3                        | 16              |                 |              |                    |
| Plasmid | Cyanothece sp. PCC 7424_4                        | 11              |                 |              |                    |
| Plasmid | Cyanothece sp. PCC 7424_5                        | 175             |                 |              |                    |
| Plasmid | Cyanothece sp. PCC 7424_6                        | 236             |                 |              |                    |
| Plasmid | Cyanothece sp. PCC 7425_1                        | 160             |                 |              |                    |
| Plasmid | Cyanothece sp. PCC 7425_2                        | 29              |                 |              |                    |
| Plasmid | Cyanothece sp. PCC 7425_3                        | 172             |                 |              |                    |
| Plasmid | Cyanothece sp. PCC 7822_1                        | 236             |                 |              |                    |
| Plasmid | Cyanothece sp. PCC 7822_2                        | 28              |                 |              |                    |
| Plasmid | Cyanothece sp. PCC 7822_3                        | 33              |                 |              |                    |
| Plasmid | Cyanothece sp. PCC 7822_4                        | 546             |                 |              |                    |
| Plasmid | Cyanothece sp. PCC 7822_5                        | 364             |                 |              |                    |
| Plasmid | Cyanothece sp. PCC 7822_6                        | 13              |                 |              |                    |
| Plasmid | Cyanothece sp. PCC 8801_1                        | 52              |                 |              |                    |
| Plasmid | Cyanothece sp. PCC 8801_2                        | 44              |                 |              |                    |
| Plasmid | Cyanothece sp. PCC 8801_3                        | 11              |                 |              |                    |
| Plasmid | Cyanothece sp. PCC 8802_1                        | 58              |                 |              |                    |
| Plasmid | Cyanothece sp. PCC 8802_2                        | 24              |                 |              |                    |
| Plasmid | Cyanothece sp. PCC 8802_3                        | 29              |                 |              |                    |
| Plasmid | Cyanothece sp. PCC 8802_4                        | 13              |                 |              |                    |
| Plasmid | Deferribacter desulfuricans SSM1_1               | 257             |                 |              |                    |
| Plasmid | Deinococcus deserti VCD115_1                     | 261             |                 |              |                    |
| Plasmid | Deinococcus deserti VCD115_2                     | 347             |                 |              |                    |
| Plasmid | Deinococcus deserti VCD115_3                     | 250             |                 |              |                    |
| Plasmid | Deinococcus geothermalis DSM 11300_1             | 519             |                 |              |                    |
| Plasmid | Deinococcus geothermalis DSM 11300_2             | 205             |                 |              |                    |
| Plasmid | Deinococcus proteolyticus MRP_1                  | 225             |                 |              |                    |
| Plasmid | Deinococcus proteolyticus MRP_2                  | 93              |                 |              |                    |
| Plasmid | Deinococcus proteolyticus MRP_3                  | 254             |                 |              |                    |
| Plasmid | Deinococcus proteolyticus MRP_4                  | 109             |                 |              |                    |
| Plasmid | Deinococcus radiodurans R1_1                     | 131             |                 |              |                    |
| Plasmid | Deinococcus radiodurans R1_2                     | 39              |                 |              |                    |
| Plasmid | Desulfobacterium autotrophicum HRM2_1            | 76              |                 |              |                    |
| Plasmid | Desulfobalobium retbaense DSM 5692_1             | 47              |                 |              |                    |
| Plasmid | Desulfotalea psychrophila LSv54_1                | 101             |                 |              |                    |
| Plasmid | Desulfotalea psychrophila LSv54_2                | 17              |                 |              |                    |
| Plasmid | Desulfovibrio magneticus RS-1_1                  | 10              |                 |              |                    |
| Plasmid | Desulfovibrio magneticus RS-1_2                  | 65              |                 |              |                    |
| Plasmid | Desulfovibrio vulgaris str. Hildenborough_1      | 156             |                 |              |                    |
| Plasmid | Desulfovibrio vulgaris subsp. vulgaris DP4_1     | 150             |                 |              |                    |
| Plasmid | Dinoroseobacter shibae DFL 12_1                  | 195             |                 |              |                    |
| Plasmid | Dinoroseobacter shibae DFL 12_2                  | 137             |                 |              |                    |
| Plasmid | Dinoroseobacter shibae DFL 12_3                  | 135             |                 |              |                    |
| Plasmid | Dinoroseobacter shibae DFL 12_4                  | 68              |                 |              |                    |
| Plasmid | Dinoroseobacter shibae DFL 12_5                  | 73              |                 |              |                    |
| Plasmid | Edwardsiella tarda EIB202_1                      | 53              |                 |              |                    |
| Plasmid | Enterobacter cloacae subsp. cloacae ATCC 13047_1 | 274             |                 |              |                    |
| Plasmid | Enterobacter cloacae subsp. cloacae ATCC 13047_2 | 124             |                 |              |                    |
| Plasmid | Enterobacter sp. 638_1                           | 125             |                 |              |                    |
| Plasmid | Enterococcus faecalis V583_1                     | 72              |                 |              |                    |
| Plasmid | Enterococcus faecalis V583_2                     | 18              |                 |              |                    |
| Plasmid | Enterococcus faecalis V583_3                     | 62              |                 |              |                    |
| Plasmid | Erwinia amylovora ATCC 49946_1                   | 41              |                 |              |                    |
| Plasmid | Erwinia amylovora ATCC 49946_2                   | 87              |                 |              |                    |
| Plasmid | Erwinia amylovora CFBP1430_1                     | 29              |                 |              |                    |
| Plasmid | Erwinia billingiae Eb661_1                       | 220             |                 |              |                    |

| Type    | Name                                                                    | Number of genes | Baltimore class | Nucleic Acid | Monophyletic group |
|---------|-------------------------------------------------------------------------|-----------------|-----------------|--------------|--------------------|
| Plasmid | <i>Erwinia pyrifoliae</i> Ep1/96_1                                      | 37              |                 |              |                    |
| Plasmid | <i>Erwinia pyrifoliae</i> Ep1/96_2                                      | 4               |                 |              |                    |
| Plasmid | <i>Erwinia pyrifoliae</i> Ep1/96_3                                      | 5               |                 |              |                    |
| Plasmid | <i>Erwinia pyrifoliae</i> Ep1/96_4                                      | 6               |                 |              |                    |
| Plasmid | <i>Erwinia tasmaniensis</i> Et1/99_1                                    | 39              |                 |              |                    |
| Plasmid | <i>Erwinia tasmaniensis</i> Et1/99_2                                    | 7               |                 |              |                    |
| Plasmid | <i>Erwinia tasmaniensis</i> Et1/99_3                                    | 42              |                 |              |                    |
| Plasmid | <i>Erwinia tasmaniensis</i> Et1/99_4                                    | 61              |                 |              |                    |
| Plasmid | <i>Erwinia tasmaniensis</i> Et1/99_5                                    | 46              |                 |              |                    |
| Plasmid | <i>Escherichia coli</i> APEC O1_1                                       | 199             |                 |              |                    |
| Plasmid | <i>Escherichia coli</i> APEC O1_2                                       | 224             |                 |              |                    |
| Plasmid | <i>Escherichia coli</i> E24377A_1                                       | 68              |                 |              |                    |
| Plasmid | <i>Escherichia coli</i> E24377A_2                                       | 29              |                 |              |                    |
| Plasmid | <i>Escherichia coli</i> E24377A_3                                       | 68              |                 |              |                    |
| Plasmid | <i>Escherichia coli</i> E24377A_4                                       | 5               |                 |              |                    |
| Plasmid | <i>Escherichia coli</i> E24377A_5                                       | 69              |                 |              |                    |
| Plasmid | <i>Escherichia coli</i> E24377A_6                                       | 3               |                 |              |                    |
| Plasmid | <i>Escherichia coli</i> O103:H2 str. 12009_1                            | 67              |                 |              |                    |
| Plasmid | <i>Escherichia coli</i> O111:H- str. 11128_1                            | 222             |                 |              |                    |
| Plasmid | <i>Escherichia coli</i> O111:H- str. 11128_2                            | 72              |                 |              |                    |
| Plasmid | <i>Escherichia coli</i> O111:H- str. 11128_3                            | 10              |                 |              |                    |
| Plasmid | <i>Escherichia coli</i> O111:H- str. 11128_4                            | 10              |                 |              |                    |
| Plasmid | <i>Escherichia coli</i> O111:H- str. 11128_5                            | 121             |                 |              |                    |
| Plasmid | <i>Escherichia coli</i> O127:H6 str. E2348/69_1                         | 9               |                 |              |                    |
| Plasmid | <i>Escherichia coli</i> O127:H6 str. E2348/69_2                         | 90              |                 |              |                    |
| Plasmid | <i>Escherichia coli</i> O157:H7 EDL933_1                                | 99              |                 |              |                    |
| Plasmid | <i>Escherichia coli</i> O157:H7 str. EC4115_1                           | 108             |                 |              |                    |
| Plasmid | <i>Escherichia coli</i> O157:H7 str. EC4115_2                           | 54              |                 |              |                    |
| Plasmid | <i>Escherichia coli</i> O157:H7 str. Sakai_1                            | 3               |                 |              |                    |
| Plasmid | <i>Escherichia coli</i> O157:H7 str. Sakai_2                            | 85              |                 |              |                    |
| Plasmid | <i>Escherichia coli</i> O157:H7 str. TW14359_1                          | 110             |                 |              |                    |
| Plasmid | <i>Escherichia coli</i> O26:H11 str. 11368_1                            | 81              |                 |              |                    |
| Plasmid | <i>Escherichia coli</i> O26:H11 str. 11368_2                            | 6               |                 |              |                    |
| Plasmid | <i>Escherichia coli</i> O26:H11 str. 11368_3                            | 65              |                 |              |                    |
| Plasmid | <i>Escherichia coli</i> O26:H11 str. 11368_4                            | 3               |                 |              |                    |
| Plasmid | <i>Escherichia coli</i> O55:H7 str. CB9615_1                            | 107             |                 |              |                    |
| Plasmid | <i>Escherichia coli</i> S88_1                                           | 135             |                 |              |                    |
| Plasmid | <i>Escherichia coli</i> SE11_1                                          | 10              |                 |              |                    |
| Plasmid | <i>Escherichia coli</i> SE11_2                                          | 7               |                 |              |                    |
| Plasmid | <i>Escherichia coli</i> SE11_3                                          | 3               |                 |              |                    |
| Plasmid | <i>Escherichia coli</i> SE11_4                                          | 112             |                 |              |                    |
| Plasmid | <i>Escherichia coli</i> SE11_5                                          | 67              |                 |              |                    |
| Plasmid | <i>Escherichia coli</i> SE11_6                                          | 124             |                 |              |                    |
| Plasmid | <i>Escherichia coli</i> SMS-3-5_1                                       | 10              |                 |              |                    |
| Plasmid | <i>Escherichia coli</i> SMS-3-5_2                                       | 4               |                 |              |                    |
| Plasmid | <i>Escherichia coli</i> SMS-3-5_3                                       | 3               |                 |              |                    |
| Plasmid | <i>Escherichia coli</i> SMS-3-5_4                                       | 153             |                 |              |                    |
| Plasmid | <i>Escherichia coli</i> UMN026_1                                        | 49              |                 |              |                    |
| Plasmid | <i>Escherichia coli</i> UMN026_2                                        | 142             |                 |              |                    |
| Plasmid | <i>Escherichia coli</i> UTI89_1                                         | 145             |                 |              |                    |
| Plasmid | <i>Escherichia fergusonii</i> ATCC 35469_1                              | 55              |                 |              |                    |
| Plasmid | <i>Eubacterium eligens</i> ATCC 27750_1                                 | 664             |                 |              |                    |
| Plasmid | <i>Eubacterium eligens</i> ATCC 27750_2                                 | 97              |                 |              |                    |
| Plasmid | <i>Exiguobacterium sibiricum</i> 255-15_1                               | 5               |                 |              |                    |
| Plasmid | <i>Exiguobacterium sibiricum</i> 255-15_2                               | 3               |                 |              |                    |
| Plasmid | <i>Finegoldia magna</i> ATCC 29328_1                                    | 182             |                 |              |                    |
| Plasmid | <i>Francisella philomiragia</i> subsp. <i>philomiragia</i> ATCC 25017_1 | 4               |                 |              |                    |
| Plasmid | <i>Gallibacterium anatis</i> UMN179_1                                   | 6               |                 |              |                    |
| Plasmid | <i>Geobacillus kaustophilus</i> HTA426_1                                | 42              |                 |              |                    |
| Plasmid | <i>Geobacillus</i> sp. WCH70_1                                          | 9               |                 |              |                    |
| Plasmid | <i>Geobacillus</i> sp. WCH70_2                                          | 31              |                 |              |                    |
| Plasmid | <i>Geobacillus</i> sp. Y4.1MC1_1                                        | 64              |                 |              |                    |
| Plasmid | <i>Geobacillus</i> sp. Y412MC52_1                                       | 39              |                 |              |                    |
| Plasmid | <i>Geobacillus</i> sp. Y412MC61_1                                       | 39              |                 |              |                    |
| Plasmid | <i>Geobacillus thermodenitrificans</i> NG80-2_1                         | 53              |                 |              |                    |
| Plasmid | <i>Geobacter lovleyi</i> SZ_1                                           | 79              |                 |              |                    |
| Plasmid | <i>Geobacter metallireducens</i> GS-15_1                                | 14              |                 |              |                    |
| Plasmid | <i>Glaciecola agarilytica</i> 4H-3-7+YE-5_1                             | 314             |                 |              |                    |
| Plasmid | <i>Gluconacetobacter diazotrophicus</i> PAI 5_1                         | 21              |                 |              |                    |
| Plasmid | <i>Gluconacetobacter diazotrophicus</i> PAI 5_2                         | 53              |                 |              |                    |
| Plasmid | <i>Gluconacetobacter diazotrophicus</i> PAI 5_3                         | 29              |                 |              |                    |
| Plasmid | <i>Gluconobacter oxydans</i> 621H_1                                     | 163             |                 |              |                    |
| Plasmid | <i>Gluconobacter oxydans</i> 621H_2                                     | 29              |                 |              |                    |
| Plasmid | <i>Gluconobacter oxydans</i> 621H_3                                     | 18              |                 |              |                    |
| Plasmid | <i>Gluconobacter oxydans</i> 621H_4                                     | 18              |                 |              |                    |
| Plasmid | <i>Gluconobacter oxydans</i> 621H_5                                     | 4               |                 |              |                    |
| Plasmid | <i>Gordonia bronchialis</i> DSM 43247_1                                 | 80              |                 |              |                    |
| Plasmid | <i>Haemophilus somnus</i> 129PT_1                                       | 6               |                 |              |                    |
| Plasmid | <i>Halalkalicoccus jeotgali</i> B3_1                                    | 362             |                 |              |                    |
| Plasmid | <i>Halalkalicoccus jeotgali</i> B3_2                                    | 362             |                 |              |                    |



| Type    | Name                                                | Number of genes | Baltimore class | Nucleic Acid | Monophyletic group |
|---------|-----------------------------------------------------|-----------------|-----------------|--------------|--------------------|
| Plasmid | Halalkalicoccus jeotgali B3_3                       | 41              |                 |              |                    |
| Plasmid | Halalkalicoccus jeotgali B3_4                       | 41              |                 |              |                    |
| Plasmid | Halalkalicoccus jeotgali B3_5                       | 24              |                 |              |                    |
| Plasmid | Halalkalicoccus jeotgali B3_6                       | 8               |                 |              |                    |
| Plasmid | Haliscomenobacter hydrossis DSM 1100_1              | 121             |                 |              |                    |
| Plasmid | Haliscomenobacter hydrossis DSM 1100_2              | 108             |                 |              |                    |
| Plasmid | Haliscomenobacter hydrossis DSM 1100_3              | 72              |                 |              |                    |
| Plasmid | Haloarcula marismortui ATCC 43049_1                 | 36              |                 |              |                    |
| Plasmid | Haloarcula marismortui ATCC 43049_2                 | 42              |                 |              |                    |
| Plasmid | Haloarcula marismortui ATCC 43049_3                 | 40              |                 |              |                    |
| Plasmid | Haloarcula marismortui ATCC 43049_4                 | 51              |                 |              |                    |
| Plasmid | Haloarcula marismortui ATCC 43049_5                 | 131             |                 |              |                    |
| Plasmid | Haloarcula marismortui ATCC 43049_6                 | 166             |                 |              |                    |
| Plasmid | Haloarcula marismortui ATCC 43049_7                 | 362             |                 |              |                    |
| Plasmid | Halobacterium salinarum R1_1                        | 152             |                 |              |                    |
| Plasmid | Halobacterium salinarum R1_2                        | 39              |                 |              |                    |
| Plasmid | Halobacterium salinarum R1_3                        | 248             |                 |              |                    |
| Plasmid | Halobacterium salinarum R1_4                        | 200             |                 |              |                    |
| Plasmid | Halobacterium sp. NRC-1_1                           | 176             |                 |              |                    |
| Plasmid | Halobacterium sp. NRC-1_2                           | 371             |                 |              |                    |
| Plasmid | Haloferax volcanii DS2_1                            | 376             |                 |              |                    |
| Plasmid | Haloferax volcanii DS2_2                            | 5               |                 |              |                    |
| Plasmid | Haloferax volcanii DS2_3                            | 611             |                 |              |                    |
| Plasmid | Haloferax volcanii DS2_4                            | 78              |                 |              |                    |
| Plasmid | Halogeometricum borinquense DSM 11551_1             | 305             |                 |              |                    |
| Plasmid | Halogeometricum borinquense DSM 11551_2             | 179             |                 |              |                    |
| Plasmid | Halogeometricum borinquense DSM 11551_3             | 309             |                 |              |                    |
| Plasmid | Halogeometricum borinquense DSM 11551_4             | 189             |                 |              |                    |
| Plasmid | Halogeometricum borinquense DSM 11551_5             | 23              |                 |              |                    |
| Plasmid | Halomicrobium mukohataei DSM 12286_1                | 176             |                 |              |                    |
| Plasmid | Haloquadratum walsbyi DSM 16790_1                   | 36              |                 |              |                    |
| Plasmid | Halorubrum lacusprofundi ATCC 49239_1               | 376             |                 |              |                    |
| Plasmid | Haloterrigena turkmenica DSM 5511_1                 | 593             |                 |              |                    |
| Plasmid | Haloterrigena turkmenica DSM 5511_2                 | 329             |                 |              |                    |
| Plasmid | Haloterrigena turkmenica DSM 5511_3                 | 175             |                 |              |                    |
| Plasmid | Haloterrigena turkmenica DSM 5511_4                 | 159             |                 |              |                    |
| Plasmid | Haloterrigena turkmenica DSM 5511_5                 | 97              |                 |              |                    |
| Plasmid | Haloterrigena turkmenica DSM 5511_6                 | 21              |                 |              |                    |
| Plasmid | Helicobacter acinonychis str. Sheeba_1              | 6               |                 |              |                    |
| Plasmid | Helicobacter pylori G27_1                           | 11              |                 |              |                    |
| Plasmid | Helicobacter pylori HPAG1_1                         | 8               |                 |              |                    |
| Plasmid | Helicobacter pylori P12_1                           | 10              |                 |              |                    |
| Plasmid | Helicobacter pylori PeCan4_1                        | 8               |                 |              |                    |
| Plasmid | Helicobacter pylori_1                               | 5               |                 |              |                    |
| Plasmid | Herpetosiphon aurantiacus ATCC 23779_1              | 231             |                 |              |                    |
| Plasmid | Herpetosiphon aurantiacus ATCC 23779_2              | 71              |                 |              |                    |
| Plasmid | Hirschia baltica ATCC 49814_1                       | 68              |                 |              |                    |
| Plasmid | Ilyobacter polytropus DSM 2926_1                    | 882             |                 |              |                    |
| Plasmid | Ilyobacter polytropus DSM 2926_2                    | 109             |                 |              |                    |
| Plasmid | Isosphaera pallida ATCC 43644_1                     | 32              |                 |              |                    |
| Plasmid | Jannaschia sp. CCS1_1                               | 71              |                 |              |                    |
| Plasmid | Ketogulonicigenium vulgare Y25_1                    | 249             |                 |              |                    |
| Plasmid | Ketogulonicigenium vulgare Y25_2                    | 220             |                 |              |                    |
| Plasmid | Kineococcus radiotolerans SRS30216_1                | 17              |                 |              |                    |
| Plasmid | Kineococcus radiotolerans SRS30216_2                | 184             |                 |              |                    |
| Plasmid | Klebsiella pneumoniae 342_1                         | 113             |                 |              |                    |
| Plasmid | Klebsiella pneumoniae 342_2                         | 230             |                 |              |                    |
| Plasmid | Klebsiella pneumoniae NTUH-K2044_1                  | 270             |                 |              |                    |
| Plasmid | Klebsiella pneumoniae subsp. pneumoniae MGH 78578_1 | 178             |                 |              |                    |
| Plasmid | Klebsiella pneumoniae subsp. pneumoniae MGH 78578_2 | 123             |                 |              |                    |
| Plasmid | Klebsiella pneumoniae subsp. pneumoniae MGH 78578_3 | 98              |                 |              |                    |
| Plasmid | Klebsiella pneumoniae subsp. pneumoniae MGH 78578_4 | 5               |                 |              |                    |
| Plasmid | Klebsiella pneumoniae subsp. pneumoniae MGH 78578_5 | 5               |                 |              |                    |
| Plasmid | Lactobacillus acidophilus 30SC_1                    | 6               |                 |              |                    |
| Plasmid | Lactobacillus acidophilus 30SC_2                    | 16              |                 |              |                    |
| Plasmid | Lactobacillus amylovorus GRL 1112_1                 | 40              |                 |              |                    |
| Plasmid | Lactobacillus amylovorus GRL 1112_2                 | 27              |                 |              |                    |
| Plasmid | Lactobacillus brevis ATCC 367_1                     | 11              |                 |              |                    |
| Plasmid | Lactobacillus brevis ATCC 367_2                     | 22              |                 |              |                    |
| Plasmid | Lactobacillus buchneri NRRL B-30929_1               | 46              |                 |              |                    |
| Plasmid | Lactobacillus buchneri NRRL B-30929_2               | 14              |                 |              |                    |
| Plasmid | Lactobacillus buchneri NRRL B-30929_3               | 18              |                 |              |                    |
| Plasmid | Lactobacillus casei ATCC 334_1                      | 20              |                 |              |                    |
| Plasmid | Lactobacillus casei str. Zhang_1                    | 44              |                 |              |                    |
| Plasmid | Lactobacillus delbrueckii subsp. bulgaricus ND02_1  | 6               |                 |              |                    |
| Plasmid | Lactobacillus johnsonii FI9785_1                    | 2               |                 |              |                    |
| Plasmid | Lactobacillus johnsonii FI9785_2                    | 23              |                 |              |                    |
| Plasmid | Lactobacillus plantarum subsp. plantarum ST-III_1   | 42              |                 |              |                    |
| Plasmid | Lactobacillus plantarum WCFS1_1                     | 3               |                 |              |                    |
| Plasmid | Lactobacillus plantarum WCFS1_2                     | 4               |                 |              |                    |

| Type    | Name                                                                                       | Number of genes | Baltimore class | Nucleic Acid | Monophyletic group |
|---------|--------------------------------------------------------------------------------------------|-----------------|-----------------|--------------|--------------------|
| Plasmid | <i>Lactobacillus plantarum</i> WCFS1_3                                                     | 43              |                 |              |                    |
| Plasmid | <i>Lactobacillus rhamnosus</i> Lc 705_1                                                    | 79              |                 |              |                    |
| Plasmid | <i>Lactobacillus salivarius</i> UCC118_1                                                   | 27              |                 |              |                    |
| Plasmid | <i>Lactobacillus salivarius</i> UCC118_2                                                   | 47              |                 |              |                    |
| Plasmid | <i>Lactobacillus salivarius</i> UCC118_3                                                   | 222             |                 |              |                    |
| Plasmid | <i>Lactococcus lactis</i> subsp. <i>cremoris</i> SK11_1                                    | 10              |                 |              |                    |
| Plasmid | <i>Lactococcus lactis</i> subsp. <i>cremoris</i> SK11_2                                    | 6               |                 |              |                    |
| Plasmid | <i>Lactococcus lactis</i> subsp. <i>cremoris</i> SK11_3                                    | 61              |                 |              |                    |
| Plasmid | <i>Lactococcus lactis</i> subsp. <i>cremoris</i> SK11_4                                    | 35              |                 |              |                    |
| Plasmid | <i>Lactococcus lactis</i> subsp. <i>cremoris</i> SK11_5                                    | 8               |                 |              |                    |
| Plasmid | <i>Lactococcus lactis</i> subsp. <i>lactis</i> KF147_1                                     | 29              |                 |              |                    |
| Plasmid | <i>Lawsonia intracellularis</i> PHE/MN1-00_1                                               | 29              |                 |              |                    |
| Plasmid | <i>Lawsonia intracellularis</i> PHE/MN1-00_2                                               | 24              |                 |              |                    |
| Plasmid | <i>Lawsonia intracellularis</i> PHE/MN1-00_3                                               | 104             |                 |              |                    |
| Plasmid | <i>Legionella longbeachae</i> NSW150_1                                                     | 67              |                 |              |                    |
| Plasmid | <i>Legionella pneumophila</i> str. <i>Lens</i> _1                                          | 56              |                 |              |                    |
| Plasmid | <i>Legionella pneumophila</i> str. <i>Paris</i> _1                                         | 139             |                 |              |                    |
| Plasmid | <i>Leptospira biflexa</i> serovar <i>Patoc</i> strain ' <i>Patoc</i> 1 ( <i>Ames</i> )'_1  | 57              |                 |              |                    |
| Plasmid | <i>Leptospira biflexa</i> serovar <i>Patoc</i> strain ' <i>Patoc</i> 1 ( <i>Paris</i> )'_1 | 59              |                 |              |                    |
| Plasmid | <i>Leuconostoc citreum</i> KM20_1                                                          | 36              |                 |              |                    |
| Plasmid | <i>Leuconostoc citreum</i> KM20_2                                                          | 20              |                 |              |                    |
| Plasmid | <i>Leuconostoc citreum</i> KM20_3                                                          | 13              |                 |              |                    |
| Plasmid | <i>Leuconostoc citreum</i> KM20_4                                                          | 49              |                 |              |                    |
| Plasmid | <i>Leuconostoc kimchii</i> IMSNU 11154_1                                                   | 21              |                 |              |                    |
| Plasmid | <i>Leuconostoc kimchii</i> IMSNU 11154_2                                                   | 21              |                 |              |                    |
| Plasmid | <i>Leuconostoc kimchii</i> IMSNU 11154_3                                                   | 21              |                 |              |                    |
| Plasmid | <i>Leuconostoc kimchii</i> IMSNU 11154_4                                                   | 36              |                 |              |                    |
| Plasmid | <i>Leuconostoc kimchii</i> IMSNU 11154_5                                                   | 4               |                 |              |                    |
| Plasmid | <i>Leuconostoc mesenteroides</i> subsp. <i>mesenteroides</i> ATCC 8293_1                   | 35              |                 |              |                    |
| Plasmid | <i>Listeria innocua</i> Clp11262_1                                                         | 75              |                 |              |                    |
| Plasmid | <i>Listeria monocytogenes</i> 08-5578_1                                                    | 78              |                 |              |                    |
| Plasmid | <i>Lysinibacillus sphaericus</i> C3-41_1                                                   | 187             |                 |              |                    |
| Plasmid | <i>Macrococcus caseolyticus</i> JCSC5402_1                                                 | 14              |                 |              |                    |
| Plasmid | <i>Macrococcus caseolyticus</i> JCSC5402_2                                                 | 69              |                 |              |                    |
| Plasmid | <i>Macrococcus caseolyticus</i> JCSC5402_3                                                 | 1               |                 |              |                    |
| Plasmid | <i>Macrococcus caseolyticus</i> JCSC5402_4                                                 | 2               |                 |              |                    |
| Plasmid | <i>Macrococcus caseolyticus</i> JCSC5402_5                                                 | 4               |                 |              |                    |
| Plasmid | <i>Macrococcus caseolyticus</i> JCSC5402_6                                                 | 4               |                 |              |                    |
| Plasmid | <i>Macrococcus caseolyticus</i> JCSC5402_7                                                 | 5               |                 |              |                    |
| Plasmid | <i>Macrococcus caseolyticus</i> JCSC5402_8                                                 | 3               |                 |              |                    |
| Plasmid | <i>Marinobacter aquaeolei</i> VT8_1                                                        | 213             |                 |              |                    |
| Plasmid | <i>Marinobacter aquaeolei</i> VT8_2                                                        | 201             |                 |              |                    |
| Plasmid | <i>Marivirga tractuosa</i> DSM 4126_1                                                      | 8               |                 |              |                    |
| Plasmid | <i>Meiothermus silvanus</i> DSM 9946_1                                                     | 306             |                 |              |                    |
| Plasmid | <i>Meiothermus silvanus</i> DSM 9946_2                                                     | 127             |                 |              |                    |
| Plasmid | <i>Melissococcus plutonius</i> ATCC 35311_1                                                | 143             |                 |              |                    |
| Plasmid | <i>Mesorhizobium ciceri</i> biovar <i>biserrulae</i> WSM1271_1                             | 394             |                 |              |                    |
| Plasmid | <i>Mesorhizobium loti</i> MAFF303099_1                                                     | 320             |                 |              |                    |
| Plasmid | <i>Mesorhizobium loti</i> MAFF303099_2                                                     | 209             |                 |              |                    |
| Plasmid | <i>Mesorhizobium</i> sp. <i>BNC1</i> _1                                                    | 317             |                 |              |                    |
| Plasmid | <i>Mesorhizobium</i> sp. <i>BNC1</i> _2                                                    | 113             |                 |              |                    |
| Plasmid | <i>Mesorhizobium</i> sp. <i>BNC1</i> _3                                                    | 49              |                 |              |                    |
| Plasmid | <i>Methanocaldococcus fervens</i> AG86_1                                                   | 35              |                 |              |                    |
| Plasmid | <i>Methanocaldococcus jannaschii</i> DSM 2661_1                                            | 45              |                 |              |                    |
| Plasmid | <i>Methanocaldococcus jannaschii</i> DSM 2661_2                                            | 12              |                 |              |                    |
| Plasmid | <i>Methanocaldococcus</i> sp. <i>FS406-22</i> _1                                           | 12              |                 |              |                    |
| Plasmid | <i>Methanocaldococcus vulcanius</i> M7_1                                                   | 13              |                 |              |                    |
| Plasmid | <i>Methanocaldococcus vulcanius</i> M7_2                                                   | 2               |                 |              |                    |
| Plasmid | <i>Methanococcus maripaludis</i> C5_1                                                      | 9               |                 |              |                    |
| Plasmid | <i>Methanohalobium evestigatum</i> Z-7303_1                                                | 106             |                 |              |                    |
| Plasmid | <i>Methanosaela concilii</i> GP-6_1                                                        | 21              |                 |              |                    |
| Plasmid | <i>Methanosarcina barkeri</i> str. <i>Fusaro</i> _1                                        | 18              |                 |              |                    |
| Plasmid | <i>Methanothermobacter marburgensis</i> str. <i>Marburg</i> _1                             | 4               |                 |              |                    |
| Plasmid | <i>Methylibium petroleiphilum</i> PM1_1                                                    | 630             |                 |              |                    |
| Plasmid | <i>Methylobacterium chloromethanicum</i> CM4_1                                             | 306             |                 |              |                    |
| Plasmid | <i>Methylobacterium chloromethanicum</i> CM4_2                                             | 37              |                 |              |                    |
| Plasmid | <i>Methylobacterium extorquens</i> AM1_1                                                   | 33              |                 |              |                    |
| Plasmid | <i>Methylobacterium extorquens</i> AM1_2                                                   | 34              |                 |              |                    |
| Plasmid | <i>Methylobacterium extorquens</i> AM1_3                                                   | 30              |                 |              |                    |
| Plasmid | <i>Methylobacterium extorquens</i> AM1_4                                                   | 1162            |                 |              |                    |
| Plasmid | <i>Methylobacterium extorquens</i> DM4_1                                                   | 105             |                 |              |                    |
| Plasmid | <i>Methylobacterium extorquens</i> DM4_2                                                   | 37              |                 |              |                    |
| Plasmid | <i>Methylobacterium nodulans</i> ORS 2060_1                                                | 409             |                 |              |                    |
| Plasmid | <i>Methylobacterium nodulans</i> ORS 2060_2                                                | 21              |                 |              |                    |
| Plasmid | <i>Methylobacterium nodulans</i> ORS 2060_3                                                | 13              |                 |              |                    |
| Plasmid | <i>Methylobacterium nodulans</i> ORS 2060_4                                                | 7               |                 |              |                    |
| Plasmid | <i>Methylobacterium nodulans</i> ORS 2060_5                                                | 402             |                 |              |                    |
| Plasmid | <i>Methylobacterium nodulans</i> ORS 2060_6                                                | 53              |                 |              |                    |
| Plasmid | <i>Methylobacterium nodulans</i> ORS 2060_7                                                | 48              |                 |              |                    |
| Plasmid | <i>Methylobacterium populi</i> BJ001_1                                                     | 26              |                 |              |                    |

| Type    | Name                                                      | Number of genes | Baltimore class | Nucleic Acid | Monophyletic group |
|---------|-----------------------------------------------------------|-----------------|-----------------|--------------|--------------------|
| Plasmid | Methylobacterium populi BJ001_2                           | 25              |                 |              |                    |
| Plasmid | Methylobacterium radiotolerans JCM 2831_1                 | 23              |                 |              |                    |
| Plasmid | Methylobacterium radiotolerans JCM 2831_2                 | 21              |                 |              |                    |
| Plasmid | Methylobacterium radiotolerans JCM 2831_3                 | 27              |                 |              |                    |
| Plasmid | Methylobacterium radiotolerans JCM 2831_4                 | 52              |                 |              |                    |
| Plasmid | Methylobacterium radiotolerans JCM 2831_5                 | 507             |                 |              |                    |
| Plasmid | Methylobacterium radiotolerans JCM 2831_6                 | 43              |                 |              |                    |
| Plasmid | Methylobacterium radiotolerans JCM 2831_7                 | 41              |                 |              |                    |
| Plasmid | Methylobacterium radiotolerans JCM 2831_8                 | 31              |                 |              |                    |
| Plasmid | Methylobacterium sp. 4-46_1                               | 62              |                 |              |                    |
| Plasmid | Methylobacterium sp. 4-46_2                               | 21              |                 |              |                    |
| Plasmid | Methylovorus sp. SIP3-4_1                                 | 79              |                 |              |                    |
| Plasmid | Methylovorus sp. SIP3-4_2                                 | 13              |                 |              |                    |
| Plasmid | Mycobacterium abscessus ATCC 19977_1                      | 21              |                 |              |                    |
| Plasmid | Mycobacterium gilvum PYR-GCK_1                            | 298             |                 |              |                    |
| Plasmid | Mycobacterium gilvum PYR-GCK_2                            | 24              |                 |              |                    |
| Plasmid | Mycobacterium gilvum PYR-GCK_3                            | 16              |                 |              |                    |
| Plasmid | Mycobacterium marinum M_1                                 | 29              |                 |              |                    |
| Plasmid | Mycobacterium sp. KMS_1                                   | 283             |                 |              |                    |
| Plasmid | Mycobacterium sp. KMS_2                                   | 232             |                 |              |                    |
| Plasmid | Mycobacterium sp. MCS_1                                   | 224             |                 |              |                    |
| Plasmid | Mycobacterium sp. Spyr1_1                                 | 196             |                 |              |                    |
| Plasmid | Mycobacterium sp. Spyr1_2                                 | 23              |                 |              |                    |
| Plasmid | Mycobacterium ulcerans Agy99_1                            | 81              |                 |              |                    |
| Plasmid | Natranaerobius thermophilus JW/NM-WN-LF_1                 | 14              |                 |              |                    |
| Plasmid | Natranaerobius thermophilus JW/NM-WN-LF_2                 | 10              |                 |              |                    |
| Plasmid | Natrialba magadii ATCC 43099_1                            | 340             |                 |              |                    |
| Plasmid | Natrialba magadii ATCC 43099_2                            | 219             |                 |              |                    |
| Plasmid | Natrialba magadii ATCC 43099_3                            | 94              |                 |              |                    |
| Plasmid | Natronomonas pharaonis DSM 2160_1                         | 125             |                 |              |                    |
| Plasmid | Natronomonas pharaonis DSM 2160_2                         | 36              |                 |              |                    |
| Plasmid | Neisseria gonorrhoeae NCCP11945_1                         | 12              |                 |              |                    |
| Plasmid | Nitrobacter hamburgensis X14_1                            | 239             |                 |              |                    |
| Plasmid | Nitrobacter hamburgensis X14_2                            | 172             |                 |              |                    |
| Plasmid | Nitrobacter hamburgensis X14_3                            | 111             |                 |              |                    |
| Plasmid | Nitrosococcus halophilus Nc4_1                            | 68              |                 |              |                    |
| Plasmid | Nitrosococcus oceani ATCC 19707_1                         | 43              |                 |              |                    |
| Plasmid | Nitrosococcus watsoni C-113_1                             | 41              |                 |              |                    |
| Plasmid | Nitrosococcus watsoni C-113_2                             | 6               |                 |              |                    |
| Plasmid | Nitrosomonas eutropha C91_1                               | 55              |                 |              |                    |
| Plasmid | Nitrosomonas eutropha C91_2                               | 52              |                 |              |                    |
| Plasmid | Nitrosomonas sp. AL212_1                                  | 65              |                 |              |                    |
| Plasmid | Nitrosomonas sp. AL212_2                                  | 86              |                 |              |                    |
| Plasmid | Nitrosospora multiformis ATCC 25196_1                     | 17              |                 |              |                    |
| Plasmid | Nitrosospora multiformis ATCC 25196_2                     | 16              |                 |              |                    |
| Plasmid | Nitrosospora multiformis ATCC 25196_3                     | 15              |                 |              |                    |
| Plasmid | Nocardia farcinica IFM 10152_1                            | 160             |                 |              |                    |
| Plasmid | Nocardia farcinica IFM 10152_2                            | 93              |                 |              |                    |
| Plasmid | Nocardioides sp. JS614_1                                  | 264             |                 |              |                    |
| Plasmid | Nocardiopsis dassonvillei subsp. dassonvillei DSM 43111_1 | 699             |                 |              |                    |
| Plasmid | Nostoc punctiforme PCC 73102_1                            | 25              |                 |              |                    |
| Plasmid | Nostoc punctiforme PCC 73102_2                            | 73              |                 |              |                    |
| Plasmid | Nostoc punctiforme PCC 73102_3                            | 260             |                 |              |                    |
| Plasmid | Nostoc punctiforme PCC 73102_4                            | 197             |                 |              |                    |
| Plasmid | Nostoc punctiforme PCC 73102_5                            | 48              |                 |              |                    |
| Plasmid | Nostoc sp. PCC 7120_1                                     | 186             |                 |              |                    |
| Plasmid | Nostoc sp. PCC 7120_2                                     | 5               |                 |              |                    |
| Plasmid | Nostoc sp. PCC 7120_3                                     | 90              |                 |              |                    |
| Plasmid | Nostoc sp. PCC 7120_4                                     | 31              |                 |              |                    |
| Plasmid | Nostoc sp. PCC 7120_5                                     | 66              |                 |              |                    |
| Plasmid | Nostoc sp. PCC 7120_6                                     | 386             |                 |              |                    |
| Plasmid | Novosphingobium aromaticivorans DSM 12444_1               | 182             |                 |              |                    |
| Plasmid | Novosphingobium aromaticivorans DSM 12444_2               | 431             |                 |              |                    |
| Plasmid | Novosphingobium sp. PP1Y_1                                | 199             |                 |              |                    |
| Plasmid | Novosphingobium sp. PP1Y_2                                | 54              |                 |              |                    |
| Plasmid | Novosphingobium sp. PP1Y_3                                | 969             |                 |              |                    |
| Plasmid | Oceanithermus profundus DSM 14977_1                       | 144             |                 |              |                    |
| Plasmid | Ochrobactrum anthropi ATCC 49188_1                        | 161             |                 |              |                    |
| Plasmid | Ochrobactrum anthropi ATCC 49188_2                        | 91              |                 |              |                    |
| Plasmid | Ochrobactrum anthropi ATCC 49188_3                        | 86              |                 |              |                    |
| Plasmid | Ochrobactrum anthropi ATCC 49188_4                        | 37              |                 |              |                    |
| Plasmid | Paenibacillus polymyxa SC2_1                              | 626             |                 |              |                    |
| Plasmid | Pantoea sp. At-9b_1                                       | 768             |                 |              |                    |
| Plasmid | Pantoea sp. At-9b_2                                       | 340             |                 |              |                    |
| Plasmid | Pantoea sp. At-9b_3                                       | 292             |                 |              |                    |
| Plasmid | Pantoea sp. At-9b_4                                       | 294             |                 |              |                    |
| Plasmid | Pantoea sp. At-9b_5                                       | 117             |                 |              |                    |
| Plasmid | Pantoea vagans C9-1_1                                     | 535             |                 |              |                    |
| Plasmid | Pantoea vagans C9-1_2                                     | 162             |                 |              |                    |
| Plasmid | Pantoea vagans C9-1_3                                     | 229             |                 |              |                    |

| Type    | Name                                           | Number of genes | Baltimore class | Nucleic Acid | Monophyletic group |
|---------|------------------------------------------------|-----------------|-----------------|--------------|--------------------|
| Plasmid | Paracoccus denitrificans PD1222_1              | 616             |                 |              |                    |
| Plasmid | Pelobacter propionicus DSM 2379_1              | 195             |                 |              |                    |
| Plasmid | Pelobacter propionicus DSM 2379_2              | 33              |                 |              |                    |
| Plasmid | Persephonella marina EX-H1_1                   | 70              |                 |              |                    |
| Plasmid | Phenyllobacterium zucineum HLK1_1              | 325             |                 |              |                    |
| Plasmid | Photobacterium profundum SS9_1                 | 67              |                 |              |                    |
| Plasmid | Photorhabdus asymbiotica_1                     | 27              |                 |              |                    |
| Plasmid | Planctomyces limnophilus DSM 3776_1            | 60              |                 |              |                    |
| Plasmid | Polaromonas naphthalenivorans CJ2_1            | 305             |                 |              |                    |
| Plasmid | Polaromonas naphthalenivorans CJ2_2            | 161             |                 |              |                    |
| Plasmid | Polaromonas naphthalenivorans CJ2_3            | 155             |                 |              |                    |
| Plasmid | Polaromonas naphthalenivorans CJ2_4            | 136             |                 |              |                    |
| Plasmid | Polaromonas naphthalenivorans CJ2_5            | 52              |                 |              |                    |
| Plasmid | Polaromonas naphthalenivorans CJ2_6            | 20              |                 |              |                    |
| Plasmid | Polaromonas naphthalenivorans CJ2_7            | 11              |                 |              |                    |
| Plasmid | Polaromonas naphthalenivorans CJ2_8            | 5               |                 |              |                    |
| Plasmid | Polaromonas sp. JS666_1                        | 326             |                 |              |                    |
| Plasmid | Polaromonas sp. JS666_2                        | 310             |                 |              |                    |
| Plasmid | Polymorphum gilvum SL003B-26A1_1               | 69              |                 |              |                    |
| Plasmid | Prosthecochloris aestuarii DSM 271_1           | 64              |                 |              |                    |
| Plasmid | Proteus mirabilis_1                            | 55              |                 |              |                    |
| Plasmid | Pseudomonas fluorescens SBW25_1                | 474             |                 |              |                    |
| Plasmid | Pseudomonas syringae pv. phaseolicola 1448A_1  | 127             |                 |              |                    |
| Plasmid | Pseudomonas syringae pv. phaseolicola 1448A_2  | 60              |                 |              |                    |
| Plasmid | Pseudomonas syringae pv. tomato str. DC3000_1  | 70              |                 |              |                    |
| Plasmid | Pseudomonas syringae pv. tomato str. DC3000_2  | 68              |                 |              |                    |
| Plasmid | Pseudonocardia dioxanivorans CB1190_1          | 14              |                 |              |                    |
| Plasmid | Pseudonocardia dioxanivorans CB1190_2          | 172             |                 |              |                    |
| Plasmid | Psychrobacter cryohalolentis K5_1              | 44              |                 |              |                    |
| Plasmid | Psychrobacter sp. PRwf-1_1                     | 14              |                 |              |                    |
| Plasmid | Psychrobacter sp. PRwf-1_2                     | 1               |                 |              |                    |
| Plasmid | Pusillimonas sp. T7-7_1                        | 77              |                 |              |                    |
| Plasmid | Pyrococcus abyssi GE5_1                        | 2               |                 |              |                    |
| Plasmid | Rahnella sp. Y9602_1                           | 595             |                 |              |                    |
| Plasmid | Rahnella sp. Y9602_2                           | 124             |                 |              |                    |
| Plasmid | Ralstonia eutropha H16_1                       | 420             |                 |              |                    |
| Plasmid | Ralstonia eutropha JMP134_1                    | 512             |                 |              |                    |
| Plasmid | Ralstonia eutropha JMP134_2                    | 88              |                 |              |                    |
| Plasmid | Ralstonia pickettii 12D_1                      | 276             |                 |              |                    |
| Plasmid | Ralstonia pickettii 12D_2                      | 67              |                 |              |                    |
| Plasmid | Ralstonia pickettii 12D_3                      | 427             |                 |              |                    |
| Plasmid | Ralstonia pickettii 12J_1                      | 90              |                 |              |                    |
| Plasmid | Ralstonia solanacearum GMI1000_1               | 1676            |                 |              |                    |
| Plasmid | Ralstonia solanacearum PSI07_1                 | 1694            |                 |              |                    |
| Plasmid | Rhizobium etli CFN 42_1                        | 336             |                 |              |                    |
| Plasmid | Rhizobium etli CFN 42_2                        | 175             |                 |              |                    |
| Plasmid | Rhizobium etli CFN 42_3                        | 163             |                 |              |                    |
| Plasmid | Rhizobium etli CFN 42_4                        | 232             |                 |              |                    |
| Plasmid | Rhizobium etli CFN 42_5                        | 455             |                 |              |                    |
| Plasmid | Rhizobium etli CFN 42_6                        | 567             |                 |              |                    |
| Plasmid | Rhizobium etli CIAT 652_1                      | 356             |                 |              |                    |
| Plasmid | Rhizobium etli CIAT 652_2                      | 976             |                 |              |                    |
| Plasmid | Rhizobium etli CIAT 652_3                      | 381             |                 |              |                    |
| Plasmid | Rhizobium leguminosarum bv. trifolii WSM1325_1 | 737             |                 |              |                    |
| Plasmid | Rhizobium leguminosarum bv. trifolii WSM1325_2 | 306             |                 |              |                    |
| Plasmid | Rhizobium leguminosarum bv. trifolii WSM1325_3 | 494             |                 |              |                    |
| Plasmid | Rhizobium leguminosarum bv. trifolii WSM1325_4 | 275             |                 |              |                    |
| Plasmid | Rhizobium leguminosarum bv. trifolii WSM1325_5 | 624             |                 |              |                    |
| Plasmid | Rhizobium leguminosarum bv. trifolii WSM2304_1 | 450             |                 |              |                    |
| Plasmid | Rhizobium leguminosarum bv. trifolii WSM2304_2 | 1161            |                 |              |                    |
| Plasmid | Rhizobium leguminosarum bv. trifolii WSM2304_3 | 256             |                 |              |                    |
| Plasmid | Rhizobium leguminosarum bv. trifolii WSM2304_4 | 223             |                 |              |                    |
| Plasmid | Rhizobium leguminosarum bv. viciae 3841_1      | 780             |                 |              |                    |
| Plasmid | Rhizobium leguminosarum bv. viciae 3841_2      | 305             |                 |              |                    |
| Plasmid | Rhizobium leguminosarum bv. viciae 3841_3      | 442             |                 |              |                    |
| Plasmid | Rhizobium leguminosarum bv. viciae 3841_4      | 156             |                 |              |                    |
| Plasmid | Rhizobium leguminosarum bv. viciae 3841_5      | 132             |                 |              |                    |
| Plasmid | Rhizobium leguminosarum bv. viciae 3841_6      | 634             |                 |              |                    |
| Plasmid | Rhodobacter capsulatus SB 1003_1               | 149             |                 |              |                    |
| Plasmid | Rhodobacter sphaeroides 2.4.1_1                | 100             |                 |              |                    |
| Plasmid | Rhodobacter sphaeroides 2.4.1_2                | 82              |                 |              |                    |
| Plasmid | Rhodobacter sphaeroides 2.4.1_3                | 87              |                 |              |                    |
| Plasmid | Rhodobacter sphaeroides 2.4.1_4                | 87              |                 |              |                    |
| Plasmid | Rhodobacter sphaeroides 2.4.1_5                | 29              |                 |              |                    |
| Plasmid | Rhodobacter sphaeroides ATCC 17025_1           | 802             |                 |              |                    |
| Plasmid | Rhodobacter sphaeroides ATCC 17025_2           | 268             |                 |              |                    |
| Plasmid | Rhodobacter sphaeroides ATCC 17025_3           | 109             |                 |              |                    |
| Plasmid | Rhodobacter sphaeroides ATCC 17025_4           | 31              |                 |              |                    |
| Plasmid | Rhodobacter sphaeroides ATCC 17025_5           | 12              |                 |              |                    |
| Plasmid | Rhodobacter sphaeroides ATCC 17029_1           | 107             |                 |              |                    |

| Type    | Name                                                                       | Number of genes | Baltimore class | Nucleic Acid | Monophyletic group |
|---------|----------------------------------------------------------------------------|-----------------|-----------------|--------------|--------------------|
| Plasmid | Rhodobacter sphaeroides KD131_1                                            | 102             |                 |              |                    |
| Plasmid | Rhodobacter sphaeroides KD131_2                                            | 142             |                 |              |                    |
| Plasmid | Rhodococcus erythropolis PR4_1                                             | 102             |                 |              |                    |
| Plasmid | Rhodococcus erythropolis PR4_2                                             | 3               |                 |              |                    |
| Plasmid | Rhodococcus erythropolis PR4_3                                             | 298             |                 |              |                    |
| Plasmid | Rhodococcus jostii RHA1_1                                                  | 1146            |                 |              |                    |
| Plasmid | Rhodococcus jostii RHA1_2                                                  | 454             |                 |              |                    |
| Plasmid | Rhodococcus jostii RHA1_3                                                  | 334             |                 |              |                    |
| Plasmid | Rhodococcus opacus B4_1                                                    | 6               |                 |              |                    |
| Plasmid | Rhodococcus opacus B4_2                                                    | 2               |                 |              |                    |
| Plasmid | Rhodococcus opacus B4_3                                                    | 593             |                 |              |                    |
| Plasmid | Rhodococcus opacus B4_4                                                    | 248             |                 |              |                    |
| Plasmid | Rhodococcus opacus B4_5                                                    | 102             |                 |              |                    |
| Plasmid | Rhodoferax ferrireducens T118_1                                            | 248             |                 |              |                    |
| Plasmid | Rhodopseudomonas palustris CGA009_1                                        | 7               |                 |              |                    |
| Plasmid | Rhodospirillum rubrum ATCC 11170_1                                         | 50              |                 |              |                    |
| Plasmid | Rhodothermus marinus DSM 4252_1                                            | 97              |                 |              |                    |
| Plasmid | Rickettsia africae ESF-5_1                                                 | 11              |                 |              |                    |
| Plasmid | Rickettsia felis URRWXCal2_1                                               | 68              |                 |              |                    |
| Plasmid | Rickettsia felis URRWXCal2_2                                               | 44              |                 |              |                    |
| Plasmid | Rickettsia massiliae MTU5_1                                                | 12              |                 |              |                    |
| Plasmid | Rickettsia peacockii str. Rustic_1                                         | 20              |                 |              |                    |
| Plasmid | Roseobacter denitrificans OCh 114_1                                        | 105             |                 |              |                    |
| Plasmid | Roseobacter denitrificans OCh 114_2                                        | 56              |                 |              |                    |
| Plasmid | Roseobacter denitrificans OCh 114_3                                        | 16              |                 |              |                    |
| Plasmid | Roseobacter denitrificans OCh 114_4                                        | 6               |                 |              |                    |
| Plasmid | Ruegeria pomeroyi DSS-3_1                                                  | 442             |                 |              |                    |
| Plasmid | Ruegeria sp. TM1040_1                                                      | 106             |                 |              |                    |
| Plasmid | Ruegeria sp. TM1040_2                                                      | 728             |                 |              |                    |
| Plasmid | Ruminococcus albus 7_1                                                     | 376             |                 |              |                    |
| Plasmid | Ruminococcus albus 7_2                                                     | 290             |                 |              |                    |
| Plasmid | Ruminococcus albus 7_3                                                     | 18              |                 |              |                    |
| Plasmid | Ruminococcus albus 7_4                                                     | 8               |                 |              |                    |
| Plasmid | Salinibacter ruber DSM 13855_1                                             | 32              |                 |              |                    |
| Plasmid | Salinibacter ruber M8_1                                                    | 13              |                 |              |                    |
| Plasmid | Salinibacter ruber M8_2                                                    | 38              |                 |              |                    |
| Plasmid | Salinibacter ruber M8_3                                                    | 50              |                 |              |                    |
| Plasmid | Salmonella enterica subsp. enterica serovar Agona str. SL483_1             | 52              |                 |              |                    |
| Plasmid | Salmonella enterica subsp. enterica serovar Choleraesuis str. SC-B67_1     | 51              |                 |              |                    |
| Plasmid | Salmonella enterica subsp. enterica serovar Choleraesuis str. SC-B67_2     | 170             |                 |              |                    |
| Plasmid | Salmonella enterica subsp. enterica serovar Dublin str. CT_02021853_1      | 103             |                 |              |                    |
| Plasmid | Salmonella enterica subsp. enterica serovar Heidelberg str. SL476_1        | 125             |                 |              |                    |
| Plasmid | Salmonella enterica subsp. enterica serovar Heidelberg str. SL476_2        | 4               |                 |              |                    |
| Plasmid | Salmonella enterica subsp. enterica serovar Newport str. SL254_1           | 190             |                 |              |                    |
| Plasmid | Salmonella enterica subsp. enterica serovar Newport str. SL254_2           | 3               |                 |              |                    |
| Plasmid | Salmonella enterica subsp. enterica serovar Paratyphi C strain RKS4594_1   | 62              |                 |              |                    |
| Plasmid | Salmonella enterica subsp. enterica serovar Schwarzengrund str. CVM19633_1 | 122             |                 |              |                    |
| Plasmid | Salmonella enterica subsp. enterica serovar Schwarzengrund str. CVM19633_2 | 5               |                 |              |                    |
| Plasmid | Salmonella enterica subsp. enterica serovar Typhi str. CT18_1              | 235             |                 |              |                    |
| Plasmid | Salmonella enterica subsp. enterica serovar Typhi str. CT18_2              | 128             |                 |              |                    |
| Plasmid | Salmonella typhimurium LT2_1                                               | 102             |                 |              |                    |
| Plasmid | Sealdella termitidis ATCC 33386_1                                          | 51              |                 |              |                    |
| Plasmid | Sealdella termitidis ATCC 33386_2                                          | 16              |                 |              |                    |
| Plasmid | Serratia proteamaculans 568_1                                              | 51              |                 |              |                    |
| Plasmid | Shewanella baltica OS155_1                                                 | 92              |                 |              |                    |
| Plasmid | Shewanella baltica OS155_2                                                 | 71              |                 |              |                    |
| Plasmid | Shewanella baltica OS155_3                                                 | 12              |                 |              |                    |
| Plasmid | Shewanella baltica OS155_4                                                 | 7               |                 |              |                    |
| Plasmid | Shewanella baltica OS185_1                                                 | 71              |                 |              |                    |
| Plasmid | Shewanella baltica OS195_1                                                 | 67              |                 |              |                    |
| Plasmid | Shewanella baltica OS195_2                                                 | 73              |                 |              |                    |
| Plasmid | Shewanella baltica OS195_3                                                 | 49              |                 |              |                    |
| Plasmid | Shewanella baltica OS223_1                                                 | 79              |                 |              |                    |
| Plasmid | Shewanella baltica OS223_2                                                 | 51              |                 |              |                    |
| Plasmid | Shewanella baltica OS223_3                                                 | 61              |                 |              |                    |
| Plasmid | Shewanella oneidensis MR-1_1                                               | 149             |                 |              |                    |
| Plasmid | Shewanella sp. ANA-3_1                                                     | 249             |                 |              |                    |
| Plasmid | Shewanella sp. MR-7_1                                                      | 8               |                 |              |                    |
| Plasmid | Shigella boydii CDC 3083-94_1                                              | 3               |                 |              |                    |
| Plasmid | Shigella boydii CDC 3083-94_2                                              | 52              |                 |              |                    |
| Plasmid | Shigella boydii CDC 3083-94_3                                              | 4               |                 |              |                    |
| Plasmid | Shigella boydii CDC 3083-94_4                                              | 242             |                 |              |                    |
| Plasmid | Shigella boydii CDC 3083-94_5                                              | 10              |                 |              |                    |
| Plasmid | Shigella boydii Sb227_1                                                    | 148             |                 |              |                    |
| Plasmid | Shigella dysenteriae Sd197_1                                               | 223             |                 |              |                    |
| Plasmid | Shigella dysenteriae Sd197_2                                               | 8               |                 |              |                    |
| Plasmid | Shigella flexneri 2a str. 301_1                                            | 263             |                 |              |                    |
| Plasmid | Shigella sonnei Ss046_1                                                    | 238             |                 |              |                    |
| Plasmid | Shigella sonnei Ss046_2                                                    | 5               |                 |              |                    |
| Plasmid | Shigella sonnei Ss046_3                                                    | 8               |                 |              |                    |

| Type    | Name                                                           | Number of genes | Baltimore class | Nucleic Acid | Monophyletic group |
|---------|----------------------------------------------------------------|-----------------|-----------------|--------------|--------------------|
| Plasmid | Shigella sonnei Ss046_4                                        | 1               |                 |              |                    |
| Plasmid | Sinorhizobium fredii NGR234_1                                  | 405             |                 |              |                    |
| Plasmid | Sinorhizobium fredii NGR234_2                                  | 2328            |                 |              |                    |
| Plasmid | Sinorhizobium medicae WSM419_1                                 | 1441            |                 |              |                    |
| Plasmid | Sinorhizobium medicae WSM419_2                                 | 1094            |                 |              |                    |
| Plasmid | Sinorhizobium medicae WSM419_3                                 | 149             |                 |              |                    |
| Plasmid | Sinorhizobium melloti 1021_1                                   | 1290            |                 |              |                    |
| Plasmid | Sinorhizobium melloti 1021_2                                   | 1569            |                 |              |                    |
| Plasmid | Sodalis glossinidius str. 'morsitans'_1                        | 54              |                 |              |                    |
| Plasmid | Sodalis glossinidius str. 'morsitans'_2                        | 23              |                 |              |                    |
| Plasmid | Sodalis glossinidius str. 'morsitans'_3                        | 7               |                 |              |                    |
| Plasmid | Sphingobium japonicum UT26S_1                                  | 44              |                 |              |                    |
| Plasmid | Sphingobium japonicum UT26S_2                                  | 224             |                 |              |                    |
| Plasmid | Sphingobium japonicum UT26S_3                                  | 8               |                 |              |                    |
| Plasmid | Sphingomonas wittichii RW1_1                                   | 285             |                 |              |                    |
| Plasmid | Sphingomonas wittichii RW1_2                                   | 210             |                 |              |                    |
| Plasmid | Sphingopyxis alaskensis RB2256_1                               | 30              |                 |              |                    |
| Plasmid | Spirosoma linguale DSM 74_1                                    | 177             |                 |              |                    |
| Plasmid | Spirosoma linguale DSM 74_2                                    | 142             |                 |              |                    |
| Plasmid | Spirosoma linguale DSM 74_3                                    | 40              |                 |              |                    |
| Plasmid | Spirosoma linguale DSM 74_4                                    | 14              |                 |              |                    |
| Plasmid | Spirosoma linguale DSM 74_5                                    | 12              |                 |              |                    |
| Plasmid | Spirosoma linguale DSM 74_6                                    | 10              |                 |              |                    |
| Plasmid | Spirosoma linguale DSM 74_7                                    | 11              |                 |              |                    |
| Plasmid | Spirosoma linguale DSM 74_8                                    | 8               |                 |              |                    |
| Plasmid | Staphylococcus aureus subsp. aureus COL_1                      | 3               |                 |              |                    |
| Plasmid | Staphylococcus aureus subsp. aureus ED98_1                     | 2               |                 |              |                    |
| Plasmid | Staphylococcus aureus subsp. aureus ED98_2                     | 3               |                 |              |                    |
| Plasmid | Staphylococcus aureus subsp. aureus ED98_3                     | 23              |                 |              |                    |
| Plasmid | Staphylococcus aureus subsp. aureus JH1_1                      | 33              |                 |              |                    |
| Plasmid | Staphylococcus aureus subsp. aureus JH9_1                      | 29              |                 |              |                    |
| Plasmid | Staphylococcus aureus subsp. aureus MSSA476_1                  | 19              |                 |              |                    |
| Plasmid | Staphylococcus aureus subsp. aureus Mu50_1                     | 34              |                 |              |                    |
| Plasmid | Staphylococcus aureus subsp. aureus N315_1                     | 31              |                 |              |                    |
| Plasmid | Staphylococcus aureus subsp. aureus USA300_FPR3757_1           | 5               |                 |              |                    |
| Plasmid | Staphylococcus aureus subsp. aureus USA300_FPR3757_2           | 3               |                 |              |                    |
| Plasmid | Staphylococcus aureus subsp. aureus USA300_FPR3757_3           | 36              |                 |              |                    |
| Plasmid | Staphylococcus aureus subsp. aureus USA300_TCH1516_1           | 26              |                 |              |                    |
| Plasmid | Staphylococcus aureus subsp. aureus USA300_TCH1516_2           | 6               |                 |              |                    |
| Plasmid | Staphylococcus epidermidis ATCC 12228_1                        | 11              |                 |              |                    |
| Plasmid | Staphylococcus epidermidis ATCC 12228_2                        | 22              |                 |              |                    |
| Plasmid | Staphylococcus epidermidis ATCC 12228_3                        | 16              |                 |              |                    |
| Plasmid | Staphylococcus epidermidis ATCC 12228_4                        | 8               |                 |              |                    |
| Plasmid | Staphylococcus epidermidis ATCC 12228_5                        | 6               |                 |              |                    |
| Plasmid | Staphylococcus epidermidis ATCC 12228_6                        | 3               |                 |              |                    |
| Plasmid | Staphylococcus epidermidis RP62A_1                             | 32              |                 |              |                    |
| Plasmid | Staphylococcus haemolyticus JCSC1435_1                         | 3               |                 |              |                    |
| Plasmid | Staphylococcus haemolyticus JCSC1435_2                         | 2               |                 |              |                    |
| Plasmid | Staphylococcus haemolyticus JCSC1435_3                         | 11              |                 |              |                    |
| Plasmid | Staphylococcus saprophyticus subsp. saprophyticus ATCC 15305_1 | 45              |                 |              |                    |
| Plasmid | Staphylococcus saprophyticus subsp. saprophyticus ATCC 15305_2 | 23              |                 |              |                    |
| Plasmid | Streptobacillus moniliformis DSM 12112_1                       | 8               |                 |              |                    |
| Plasmid | Streptococcus gallolyticus subsp. gallolyticus ATCC BAA-2069_1 | 20              |                 |              |                    |
| Plasmid | Streptococcus suis BM407_1                                     | 15              |                 |              |                    |
| Plasmid | Streptococcus thermophilus LMD-9_1                             | 4               |                 |              |                    |
| Plasmid | Streptococcus thermophilus LMD-9_2                             | 2               |                 |              |                    |
| Plasmid | Streptomyces avermitilis MA-4680_1                             | 96              |                 |              |                    |
| Plasmid | Streptomyces coelicolor A3(2)_1                                | 351             |                 |              |                    |
| Plasmid | Streptomyces coelicolor A3(2)_2                                | 34              |                 |              |                    |
| Plasmid | Streptosporangium roseum DSM 43021_1                           | 30              |                 |              |                    |
| Plasmid | Sulfolobus islandicus L.D.8.5_1                                | 32              |                 |              |                    |
| Plasmid | Sulfolobus islandicus Y.N.15.51_1                              | 50              |                 |              |                    |
| Plasmid | Sulfuricurvum kujiense DSM 16994_1                             | 112             |                 |              |                    |
| Plasmid | Sulfuricurvum kujiense DSM 16994_2                             | 86              |                 |              |                    |
| Plasmid | Sulfuricurvum kujiense DSM 16994_3                             | 58              |                 |              |                    |
| Plasmid | Sulfuricurvum kujiense DSM 16994_4                             | 4               |                 |              |                    |
| Plasmid | Synechococcus elongatus PCC 7942_1                             | 50              |                 |              |                    |
| Plasmid | Synechococcus sp. PCC 7002_1                                   | 165             |                 |              |                    |
| Plasmid | Synechococcus sp. PCC 7002_2                                   | 3               |                 |              |                    |
| Plasmid | Synechococcus sp. PCC 7002_3                                   | 17              |                 |              |                    |
| Plasmid | Synechococcus sp. PCC 7002_4                                   | 30              |                 |              |                    |
| Plasmid | Synechococcus sp. PCC 7002_5                                   | 39              |                 |              |                    |
| Plasmid | Synechococcus sp. PCC 7002_6                                   | 109             |                 |              |                    |
| Plasmid | Synechocystis sp. PCC 6803_1                                   | 132             |                 |              |                    |
| Plasmid | Synechocystis sp. PCC 6803_2                                   | 105             |                 |              |                    |
| Plasmid | Synechocystis sp. PCC 6803_3                                   | 49              |                 |              |                    |
| Plasmid | Synechocystis sp. PCC 6803_4                                   | 110             |                 |              |                    |
| Plasmid | Thauera sp. MZ1T_1                                             | 75              |                 |              |                    |
| Plasmid | Thermococcus barophilus MP_1                                   | 58              |                 |              |                    |
| Plasmid | Thermofilum pendens Hrk 5_1                                    | 52              |                 |              |                    |

| Type    | Name                                                              | Number of genes | Baltimore class | Nucleic Acid | Monophyletic group |
|---------|-------------------------------------------------------------------|-----------------|-----------------|--------------|--------------------|
| Plasmid | Thermomicrobium roseum DSM 5159_1                                 | 937             |                 |              |                    |
| Plasmid | Thermovibrio ammonificans HB-1_1                                  | 102             |                 |              |                    |
| Plasmid | Thermus scotoductus SA-01_1                                       | 12              |                 |              |                    |
| Plasmid | Thermus thermophilus HB27_1                                       | 228             |                 |              |                    |
| Plasmid | Thermus thermophilus HB8_1                                        | 251             |                 |              |                    |
| Plasmid | Thermus thermophilus HB8_2                                        | 14              |                 |              |                    |
| Plasmid | Thioalkalivibrio sp. K90mix_1                                     | 280             |                 |              |                    |
| Plasmid | Thiomonas intermedia K12_1                                        | 43              |                 |              |                    |
| Plasmid | Thiomonas intermedia K12_2                                        | 23              |                 |              |                    |
| Plasmid | Treponema succinifaciens DSM 2489_1                               | 156             |                 |              |                    |
| Plasmid | Tsukamurella paurometabola DSM 20162_1                            | 85              |                 |              |                    |
| Plasmid | uncultured Termite group 1 bacterium phylotype Rs-D17_1           | 9               |                 |              |                    |
| Plasmid | uncultured Termite group 1 bacterium phylotype Rs-D17_2           | 3               |                 |              |                    |
| Plasmid | uncultured Termite group 1 bacterium phylotype Rs-D17_3           | 3               |                 |              |                    |
| Plasmid | Verminephrobacter eiseniae EF01-2_1                               | 39              |                 |              |                    |
| Plasmid | Verrucosipora maris AB-18-032_1                                   | 53              |                 |              |                    |
| Plasmid | Vibrio fischeri ES114_1                                           | 57              |                 |              |                    |
| Plasmid | Vibrio fischeri MJ11_1                                            | 195             |                 |              |                    |
| Plasmid | Vibrio harveyi ATCC BAA-1116_1                                    | 120             |                 |              |                    |
| Plasmid | Vibrio vulnificus YJ016_1                                         | 69              |                 |              |                    |
| Plasmid | Waddlia chondrophila WSU 86-1044_1                                | 22              |                 |              |                    |
| Plasmid | Wigglesworthia glossinidia endosymbiont of Glossina brevipalpis_1 | 6               |                 |              |                    |
| Plasmid | Xanthobacter autotrophicus Py2_1                                  | 289             |                 |              |                    |
| Plasmid | Xanthomonas axonopodis pv. citri str. 306_1                       | 42              |                 |              |                    |
| Plasmid | Xanthomonas axonopodis pv. citri str. 306_2                       | 73              |                 |              |                    |
| Plasmid | Xanthomonas campestris pv. vesicatoria str. 85-10_1               | 2               |                 |              |                    |
| Plasmid | Xanthomonas campestris pv. vesicatoria str. 85-10_2               | 22              |                 |              |                    |
| Plasmid | Xanthomonas campestris pv. vesicatoria str. 85-10_3               | 43              |                 |              |                    |
| Plasmid | Xanthomonas campestris pv. vesicatoria str. 85-10_4               | 172             |                 |              |                    |
| Plasmid | Xenorhabdus nematophila ATCC 19061_1                              | 175             |                 |              |                    |
| Plasmid | Xylanimonas cellulolytica DSM 15894_1                             | 106             |                 |              |                    |
| Plasmid | Xylella fastidiosa 9a5c_1                                         | 2               |                 |              |                    |
| Plasmid | Xylella fastidiosa 9a5c_2                                         | 64              |                 |              |                    |
| Plasmid | Xylella fastidiosa M23_1                                          | 40              |                 |              |                    |
| Plasmid | Xylella fastidiosa Temecula1_1                                    | 2               |                 |              |                    |
| Plasmid | Yersinia enterocolitica subsp. enterocolitica 8081_1              | 72              |                 |              |                    |
| Plasmid | Yersinia enterocolitica subsp. palearctica 105.5R(r)_1            | 86              |                 |              |                    |
| Plasmid | Yersinia pestis Angola_1                                          | 88              |                 |              |                    |
| Plasmid | Yersinia pestis Angola_2                                          | 120             |                 |              |                    |
| Plasmid | Yersinia pestis Antiqua_1                                         | 99              |                 |              |                    |
| Plasmid | Yersinia pestis Antiqua_2                                         | 9               |                 |              |                    |
| Plasmid | Yersinia pestis Antiqua_3                                         | 89              |                 |              |                    |
| Plasmid | Yersinia pestis biovar Microtus str. 91001_1                      | 85              |                 |              |                    |
| Plasmid | Yersinia pestis biovar Microtus str. 91001_2                      | 30              |                 |              |                    |
| Plasmid | Yersinia pestis biovar Microtus str. 91001_3                      | 122             |                 |              |                    |
| Plasmid | Yersinia pestis biovar Microtus str. 91001_4                      | 10              |                 |              |                    |
| Plasmid | Yersinia pestis CO92_1                                            | 71              |                 |              |                    |
| Plasmid | Yersinia pestis CO92_2                                            | 9               |                 |              |                    |
| Plasmid | Yersinia pestis CO92_3                                            | 101             |                 |              |                    |
| Plasmid | Yersinia pestis KIM_1                                             | 116             |                 |              |                    |
| Plasmid | Yersinia pestis Nepal516_1                                        | 104             |                 |              |                    |
| Plasmid | Yersinia pestis Nepal516_2                                        | 9               |                 |              |                    |
| Plasmid | Yersinia pestis Pestoides F_1                                     | 88              |                 |              |                    |
| Plasmid | Yersinia pestis Pestoides F_2                                     | 131             |                 |              |                    |
| Plasmid | Yersinia pestis Z176003_1                                         | 67              |                 |              |                    |
| Plasmid | Yersinia pestis Z176003_2                                         | 76              |                 |              |                    |
| Plasmid | Yersinia pestis Z176003_3                                         | 8               |                 |              |                    |
| Plasmid | Yersinia pseudotuberculosis IP 31758_1                            | 64              |                 |              |                    |
| Plasmid | Yersinia pseudotuberculosis IP 31758_2                            | 136             |                 |              |                    |
| Plasmid | Yersinia pseudotuberculosis IP 32953_1                            | 95              |                 |              |                    |
| Plasmid | Yersinia pseudotuberculosis IP 32953_2                            | 42              |                 |              |                    |
| Plasmid | Yersinia pseudotuberculosis PB1/+_1                               | 87              |                 |              |                    |
| Plasmid | Zymomonas mobilis subsp. mobilis NCIB 11163_1                     | 46              |                 |              |                    |
| Plasmid | Zymomonas mobilis subsp. mobilis NCIB 11163_2                     | 32              |                 |              |                    |
| Plasmid | Zymomonas mobilis subsp. mobilis NCIB 11163_3                     | 6               |                 |              |                    |
| Virus   | Abaca bunchy top virus                                            | 5               | 2               | DNA          | NA                 |
| Virus   | Abalone herpesvirus Taiwan/2004                                   | 14              | 1               | DNA          | NA                 |
| Virus   | Abalone herpesvirus Victoria/AUS/2009                             | 118             | 1               | DNA          | NA                 |
| Virus   | Abalone shriveling syndrome-associated virus                      | 31              | 1               | DNA          | NA                 |
| Virus   | Abelson murine leukemia virus                                     | 6               | 6               | RNA          | 2                  |
| Virus   | Abutilon Brazil virus                                             | 7               | 2               | DNA          | 3                  |
| Virus   | Abutilon mosaic Bolivia virus                                     | 7               | 2               | DNA          | 3                  |
| Virus   | Abutilon mosaic Brazil virus                                      | 7               | 2               | DNA          | 3                  |
| Virus   | Abutilon mosaic virus                                             | 9               | 2               | DNA          | 3                  |
| Virus   | Acanthamoeba polyphaga mimivirus                                  | 979             | 1               | DNA          | 5                  |
| Virus   | Acanthocystis turfacea Chlorella virus 1                          | 860             | 1               | DNA          | 5                  |
| Virus   | Acheta domestica densovirus                                       | 5               | 2               | DNA          | 3                  |
| Virus   | Acholeplasma phage L2                                             | 16              | 1               | DNA          | NA                 |
| Virus   | Acholeplasma phage MV-L1                                          | 4               | 2               | DNA          | NA                 |
| Virus   | Acidianus bottle-shaped virus                                     | 57              | 1               | DNA          | NA                 |

| Type  | Name                                                     | Number of genes | Baltimore class | Nucleic Acid | Monophyletic group |
|-------|----------------------------------------------------------|-----------------|-----------------|--------------|--------------------|
| Virus | Acidianus filamentous virus 1                            | 40              | 1               | DNA          | NA                 |
| Virus | Acidianus filamentous virus 2                            | 52              | 1               | DNA          | NA                 |
| Virus | Acidianus filamentous virus 3                            | 68              | 1               | DNA          | NA                 |
| Virus | Acidianus filamentous virus 6                            | 66              | 1               | DNA          | NA                 |
| Virus | Acidianus filamentous virus 7                            | 57              | 1               | DNA          | NA                 |
| Virus | Acidianus filamentous virus 8                            | 61              | 1               | DNA          | NA                 |
| Virus | Acidianus filamentous virus 9                            | 73              | 1               | DNA          | NA                 |
| Virus | Acidianus rod-shaped virus 1                             | 41              | 1               | DNA          | NA                 |
| Virus | Acidianus spindle-shaped virus 1                         | 38              | 1               | DNA          | NA                 |
| Virus | Acidianus two-tailed virus                               | 72              | 1               | DNA          | NA                 |
| Virus | Acinetobacter bacteriophage AP22                         | 89              | 1               | DNA          | 1                  |
| Virus | Acinetobacter phage 133                                  | 257             | 1               | DNA          | 4                  |
| Virus | Acinetobacter phage Ac42                                 | 255             | 1               | DNA          | 1                  |
| Virus | Acinetobacter phage Acj61                                | 241             | 1               | DNA          | 1                  |
| Virus | Acinetobacter phage Acj9                                 | 253             | 1               | DNA          | 1                  |
| Virus | Acinetobacter phage AP205                                | 4               | 4               | RNA          | 1                  |
| Virus | Acinetobacter phage ZZ1                                  | 402             | 1               | DNA          | 1                  |
| Virus | Aconitum latent virus                                    | 6               | 4               | RNA          | 1                  |
| Virus | Actinidia virus B                                        | 5               | 4               | RNA          | 1                  |
| Virus | Actinomyces phage Av-1                                   | 22              | 1               | DNA          | 4                  |
| Virus | Actinoplanes phage phiAsp2                               | 76              | 1               | DNA          | 4                  |
| Virus | Acute bee paralysis virus                                | 3               | 4               | RNA          | 1                  |
| Virus | Acyrthosiphon pisum bacteriophage APSE-1                 | 54              | 1               | DNA          | 4                  |
| Virus | Acyrthosiphon pisum virus                                | 2               | 4               | RNA          | NA                 |
| Virus | Adeno-associated virus - 1                               | 2               | 2               | DNA          | 3                  |
| Virus | Adeno-associated virus - 2                               | 8               | 2               | DNA          | 3                  |
| Virus | Adeno-associated virus - 3                               | 2               | 2               | DNA          | 3                  |
| Virus | Adeno-associated virus - 4                               | 2               | 2               | DNA          | 3                  |
| Virus | Adeno-associated virus - 5                               | 2               | 2               | DNA          | 3                  |
| Virus | Adeno-associated virus - 7                               | 2               | 2               | DNA          | 3                  |
| Virus | Adeno-associated virus - 8                               | 2               | 2               | DNA          | 3                  |
| Virus | Adoxophyes honmai NPV                                    | 125             | 1               | DNA          | NA                 |
| Virus | Adoxophyes orana granulovirus                            | 119             | 1               | DNA          | NA                 |
| Virus | Adoxophyes orana nucleopolyhedrovirus                    | 121             | 1               | DNA          | NA                 |
| Virus | Adult diarrheal rotavirus strain J19                     | 11              | 3               | RNA          | NA                 |
| Virus | Aedes aegypti densovirus                                 | 3               | 2               | DNA          | 3                  |
| Virus | Aedes albopictus densovirus                              | 3               | 2               | DNA          | 3                  |
| Virus | Aedes flavivirus                                         | 14              | 4               | RNA          | 1                  |
| Virus | Aedes pseudoscutellaris reovirus                         | 9               | 3               | RNA          | NA                 |
| Virus | Aeromonas phage 25                                       | 242             | 1               | DNA          | 4                  |
| Virus | Aeromonas phage 31                                       | 247             | 1               | DNA          | 4                  |
| Virus | Aeromonas phage 44RR2.8t                                 | 252             | 1               | DNA          | 4                  |
| Virus | Aeromonas phage 65                                       | 437             | 1               | DNA          | 4                  |
| Virus | Aeromonas phage Aeh1                                     | 352             | 1               | DNA          | 4                  |
| Virus | Aeromonas phage phiAS4                                   | 271             | 1               | DNA          | 4                  |
| Virus | Aeromonas phage phiAS5                                   | 343             | 1               | DNA          | 4                  |
| Virus | Aeromonas phage phiO18P                                  | 45              | 1               | DNA          | 4                  |
| Virus | African cassava mosaic virus                             | 9               | 2               | DNA          | 3                  |
| Virus | African green monkey polyomavirus                        | 5               | 1               | DNA          | 3                  |
| Virus | African green monkey simian foamy virus                  | 5               | 6               | RNA          | 2                  |
| Virus | African horsesickness virus                              | 11              | 3               | RNA          | NA                 |
| Virus | African oil palm ringspot virus                          | 5               | 4               | RNA          | 1                  |
| Virus | African swine fever virus                                | 160             | 1               | DNA          | 5                  |
| Virus | Ageratum enation virus                                   | 6               | 2               | DNA          | 3                  |
| Virus | Ageratum leaf Cameroon betasatellite                     | 1               | 2               | DNA          | 3                  |
| Virus | Ageratum leaf curl Buea betasatellite                    | 1               | 2               | DNA          | 3                  |
| Virus | Ageratum leaf curl Cameroon alphasatellite               | 3               | 2               | DNA          | 3                  |
| Virus | Ageratum leaf curl Cameroon virus                        | 6               | 2               | DNA          | 3                  |
| Virus | Ageratum leaf curl disease associated satellite DNA beta | 1               | 2               | DNA          | 3                  |
| Virus | Ageratum yellow vein China betasatellite                 | 1               | 2               | DNA          | 3                  |
| Virus | Ageratum yellow vein China virus                         | 6               | 2               | DNA          | 3                  |
| Virus | Ageratum yellow vein Hualian virus                       | 6               | 2               | DNA          | 3                  |
| Virus | Ageratum yellow vein Singapore alphasatellite            | 1               | 2               | DNA          | 3                  |
| Virus | Ageratum yellow vein Sri Lanka virus                     | 6               | 2               | DNA          | 3                  |
| Virus | Ageratum yellow vein Taiwan virus                        | 6               | 2               | DNA          | 3                  |
| Virus | Ageratum yellow vein virus                               | 7               | 2               | DNA          | 3                  |
| Virus | Ageratum yellow vein virus satellite DNA beta            | 1               | 2               | DNA          | 3                  |
| Virus | Aggregatibacter phage S1249                              | 66              | 1               | DNA          | 4                  |
| Virus | Agropyron mosaic virus                                   | 12              | 4               | RNA          | 1                  |
| Virus | Agrotis ipsilon multiple nucleopolyhedrovirus            | 163             | 1               | DNA          | NA                 |
| Virus | Agrotis segetum granulovirus                             | 132             | 1               | DNA          | NA                 |
| Virus | Agrotis segetum nucleopolyhedrovirus                     | 153             | 1               | DNA          | NA                 |
| Virus | Aguacate virus                                           | 4               | 5               | RNA          | NA                 |
| Virus | Aichi virus                                              | 11              | 4               | RNA          | 1                  |
| Virus | Aino virus                                               | 4               | 5               | RNA          | NA                 |
| Virus | Akabane virus                                            | 4               | 5               | RNA          | NA                 |
| Virus | Alcelaphine herpesvirus 1                                | 71              | 1               | DNA          | NA                 |
| Virus | Aleutian mink disease virus                              | 4               | 2               | DNA          | 3                  |
| Virus | Alfalfa mosaic virus                                     | 4               | 4               | RNA          | 1                  |
| Virus | Algerian watermelon mosaic virus                         | 12              | 4               | RNA          | 1                  |



| Type  | Name                                         | Number of genes | Baltimore class | Nucleic Acid | Monophyletic group |
|-------|----------------------------------------------|-----------------|-----------------|--------------|--------------------|
| Virus | Alkhumra hemorrhagic fever virus             | 14              | 4               | RNA          | 1                  |
| Virus | Allamanda leaf curl virus                    | 6               | 2               | DNA          | 3                  |
| Virus | Allium virus X                               | 5               | 4               | RNA          | 1                  |
| Virus | Allpahuayo virus                             | 4               | 5               | RNA          | NA                 |
| Virus | Alphapapillomavirus 12                       | 8               | 1               | DNA          | 3                  |
| Virus | Alphapapillomavirus 13                       | 7               | 1               | DNA          | 3                  |
| Virus | Alphapapillomavirus 3                        | 7               | 1               | DNA          | 3                  |
| Virus | Alstroemeria virus x                         | 5               | 4               | RNA          | 1                  |
| Virus | Alternanthera mosaic virus                   | 5               | 4               | RNA          | 1                  |
| Virus | Alternanthera yellow vein betasatellite      | 1               | 2               | DNA          | 3                  |
| Virus | Alternanthera yellow vein virus              | 6               | 2               | DNA          | 3                  |
| Virus | Alternaria alternata virus 1                 | 4               | 3               | RNA          | NA                 |
| Virus | Amapari virus                                | 4               | 5               | RNA          | NA                 |
| Virus | Amasya cherry disease associated chrysovirus | 4               | 3               | RNA          | NA                 |
| Virus | Amasya cherry disease-associated mycovirus   | 2               | 3               | RNA          | 1                  |
| Virus | Amazon lily mild mottle virus                | 4               | 4               | RNA          | NA                 |
| Virus | Ambystoma tigrinum virus                     | 95              | 1               | DNA          | 5                  |
| Virus | American grass carp reovirus                 | 12              | 3               | RNA          | NA                 |
| Virus | American hop latent virus                    | 6               | 4               | RNA          | 1                  |
| Virus | American plum line pattern virus             | 4               | 4               | RNA          | 1                  |
| Virus | Amsacta moorei entomopoxvirus 'L'            | 294             | 1               | DNA          | 5                  |
| Virus | Anagyris vein yellowing virus                | 3               | 4               | RNA          | 1                  |
| Virus | Anatid herpesvirus 1                         | 77              | 1               | DNA          | NA                 |
| Virus | Andes virus                                  | 4               | 5               | RNA          | NA                 |
| Virus | Angelonia flower break virus                 | 6               | 4               | RNA          | 1                  |
| Virus | Anguillid herpesvirus 1                      | 134             | 1               | DNA          | NA                 |
| Virus | Anopheles gambiae densonucleosis virus       | 3               | 2               | DNA          | 3                  |
| Virus | Antheraea pernyi nucleopolyhedrovirus        | 147             | 1               | DNA          | NA                 |
| Virus | Anticarsia gemmatalis nucleopolyhedrovirus   | 152             | 1               | DNA          | NA                 |
| Virus | Aotine herpesvirus 1                         | 153             | 1               | DNA          | NA                 |
| Virus | Aphid lethal paralysis virus                 | 2               | 4               | RNA          | 1                  |
| Virus | Apium virus Y                                | 12              | 4               | RNA          | 1                  |
| Virus | Apocheima cinerarium nucleopolyhedrovirus    | 117             | 1               | DNA          | NA                 |
| Virus | Apoi virus                                   | 14              | 4               | RNA          | 1                  |
| Virus | Apple chlorotic leaf spot virus              | 3               | 4               | RNA          | 1                  |
| Virus | Apple latent spherical virus                 | 11              | 4               | RNA          | 1                  |
| Virus | Apple mosaic virus                           | 4               | 4               | RNA          | 1                  |
| Virus | Apple stem grooving virus                    | 2               | 4               | RNA          | 1                  |
| Virus | Apple stem pitting virus                     | 5               | 4               | RNA          | 1                  |
| Virus | Apricot latent virus                         | 5               | 4               | RNA          | 1                  |
| Virus | Apricot pseudo-chlorotic leaf spot virus     | 3               | 4               | RNA          | 1                  |
| Virus | Aquareovirus A                               | 9               | 3               | RNA          | NA                 |
| Virus | Aquareovirus C                               | 12              | 3               | RNA          | NA                 |
| Virus | Arabidopsis mosaic virus                     | 10              | 4               | RNA          | 1                  |
| Virus | Arabidopsis mosaic virus large satellite RNA | 1               | NA              | RNA          | NA                 |
| Virus | Archaeal BJ1 virus                           | 70              | 1               | DNA          | 4                  |
| Virus | Armigeres subalbatus virus SaX06-AK20        | 2               | 3               | RNA          | NA                 |
| Virus | Aroa virus                                   | 1               | 4               | RNA          | 1                  |
| Virus | Arracacha mottle virus                       | 1               | 4               | RNA          | 1                  |
| Virus | Artemisia virus A                            | 4               | 4               | RNA          | 1                  |
| Virus | Artibeus jamaicensis parvovirus 1            | 2               | 2               | DNA          | NA                 |
| Virus | Artichoke mottled crinkle virus              | 5               | 4               | RNA          | 1                  |
| Virus | Asclepias asymptomatic virus                 | 3               | 4               | RNA          | 1                  |
| Virus | Asparagus virus 2                            | 5               | 4               | RNA          | 1                  |
| Virus | Asparagus virus 3                            | 5               | 4               | RNA          | 1                  |
| Virus | Astrovirus MLB1                              | 3               | 4               | RNA          | 1                  |
| Virus | Astrovirus MLB1 HK05                         | 3               | 4               | RNA          | 1                  |
| Virus | Astrovirus MLB2                              | 3               | 4               | RNA          | 1                  |
| Virus | Astrovirus MLB3                              | 3               | 4               | RNA          | 1                  |
| Virus | Astrovirus VA1                               | 3               | 4               | RNA          | 1                  |
| Virus | Astrovirus VA2                               | 3               | 4               | RNA          | 1                  |
| Virus | Astrovirus VA3                               | 3               | 4               | RNA          | 1                  |
| Virus | Astrovirus VA4                               | 3               | 4               | RNA          | 1                  |
| Virus | Astrovirus wild boar/WBAstV-1/2011/HUN       | 3               | 4               | RNA          | 1                  |
| Virus | Asystasia begomovirus 1                      | 8               | 2               | DNA          | 3                  |
| Virus | Ateline herpesvirus 3                        | 73              | 1               | DNA          | NA                 |
| Virus | Atkinsonella hypoxylon partitivirus          | 2               | 3               | RNA          | 1                  |
| Virus | Atlantic salmon swim bladder sarcoma virus   | 3               | 6               | RNA          | 2                  |
| Virus | Aura virus                                   | 14              | 4               | RNA          | 1                  |
| Virus | Australian bat lyssavirus                    | 5               | 5               | RNA          | NA                 |
| Virus | Autographa californica nucleopolyhedrovirus  | 156             | 1               | DNA          | NA                 |
| Virus | Avian adeno-associated virus ATCC VR-865     | 2               | 2               | DNA          | 3                  |
| Virus | Avian adeno-associated virus strain DA-1     | 2               | 2               | DNA          | 3                  |
| Virus | Avian carcinoma virus                        | 1               | 6               | RNA          | 2                  |
| Virus | Avian encephalomyelitis virus                | 12              | 4               | RNA          | 1                  |
| Virus | Avian endogenous retrovirus EAV-HP           | 1               | 6               | RNA          | 2                  |
| Virus | Avian gyrovirus 2                            | 3               | 2               | DNA          | 3                  |
| Virus | Avian leukemia virus                         | 3               | 6               | RNA          | 2                  |
| Virus | Avian leukosis virus                         | 3               | 6               | RNA          | 2                  |
| Virus | Avian metapneumovirus                        | 9               | 5               | RNA          | NA                 |

| Type  | Name                                                 | Number of genes | Baltimore class | Nucleic Acid | Monophyletic group |
|-------|------------------------------------------------------|-----------------|-----------------|--------------|--------------------|
| Virus | Avian myelocytomatosis virus                         | 5               | 6               | RNA          | 2                  |
| Virus | Avian orthoreovirus                                  | 10              | 3               | RNA          | NA                 |
| Virus | Avian paramyxovirus 6                                | 7               | 5               | RNA          | NA                 |
| Virus | Avian sapelovirus                                    | 13              | 4               | RNA          | 1                  |
| Virus | Azospirillum phage Cd                                | 95              | 1               | DNA          | 4                  |
| Virus | Baboon orthoreovirus                                 | 11              | 3               | RNA          | NA                 |
| Virus | Bacillus phage 0305phi8-36                           | 246             | 1               | DNA          | 4                  |
| Virus | Bacillus phage AP50                                  | 31              | 1               | DNA          | NA                 |
| Virus | Bacillus phage B103                                  | 17              | 1               | DNA          | 4                  |
| Virus | Bacillus phage B4                                    | 277             | 1               | DNA          | NA                 |
| Virus | Bacillus phage Bam35c                                | 32              | 1               | DNA          | NA                 |
| Virus | Bacillus phage Bastille                              | 267             | 1               | DNA          | NA                 |
| Virus | Bacillus phage BCJA1c                                | 58              | 1               | DNA          | 4                  |
| Virus | Bacillus phage BCP78                                 | 227             | 1               | DNA          | NA                 |
| Virus | Bacillus phage BPS13                                 | 268             | 1               | DNA          | NA                 |
| Virus | Bacillus phage BtCS33                                | 57              | 1               | DNA          | NA                 |
| Virus | Bacillus phage Cherry                                | 51              | 1               | DNA          | 4                  |
| Virus | Bacillus phage Fah                                   | 50              | 1               | DNA          | 4                  |
| Virus | Bacillus phage GA-1                                  | 35              | 1               | DNA          | 4                  |
| Virus | Bacillus phage Gamma                                 | 53              | 1               | DNA          | 4                  |
| Virus | Bacillus phage IEBH                                  | 86              | 1               | DNA          | 4                  |
| Virus | Bacillus phage PBC1                                  | 50              | 1               | DNA          | NA                 |
| Virus | Bacillus phage phBC6A51                              | 75              | 1               | DNA          | NA                 |
| Virus | Bacillus phage phBC6A52                              | 49              | 1               | DNA          | NA                 |
| Virus | Bacillus phage phi105                                | 51              | 1               | DNA          | 4                  |
| Virus | Bacillus phage phi29                                 | 27              | 1               | DNA          | 4                  |
| Virus | Bacillus phage SPBc2                                 | 185             | 1               | DNA          | NA                 |
| Virus | Bacillus phage SPO1                                  | 206             | 1               | DNA          | 4                  |
| Virus | Bacillus phage SPP1                                  | 101             | 1               | DNA          | 4                  |
| Virus | Bacillus phage TP21-L                                | 56              | 1               | DNA          | 4                  |
| Virus | Bacillus phage W.Ph.                                 | 258             | 1               | DNA          | NA                 |
| Virus | Bacillus phage WBeta                                 | 53              | 1               | DNA          | 4                  |
| Virus | Bacillus thuringiensis phage GIL16c                  | 31              | 1               | DNA          | NA                 |
| Virus | Bacillus virus 1                                     | 54              | 1               | DNA          | NA                 |
| Virus | Bacteriophage APSE-2                                 | 41              | 1               | DNA          | 4                  |
| Virus | Bacteroides phage B124-14                            | 68              | 1               | DNA          | 4                  |
| Virus | Bacteroides phage B40-8                              | 46              | 1               | DNA          | 4                  |
| Virus | Bagaza virus                                         | 1               | 4               | RNA          | 1                  |
| Virus | Bamboo mosaic virus                                  | 6               | 4               | RNA          | 1                  |
| Virus | Bamboo mosaic virus satellite RNA                    | 1               | NA              | RNA          | NA                 |
| Virus | Banana bract mosaic virus                            | 12              | 4               | RNA          | 1                  |
| Virus | Banana bunchy top virus                              | 5               | 2               | DNA          | NA                 |
| Virus | Banana mild mosaic virus                             | 5               | 4               | RNA          | 1                  |
| Virus | Banana streak CA virus                               | 3               | 7               | DNA          | 2                  |
| Virus | Banana streak GF virus                               | 3               | 7               | DNA          | 2                  |
| Virus | Banana streak IM virus                               | 3               | 7               | DNA          | 2                  |
| Virus | Banana streak Mysore virus                           | 3               | 7               | DNA          | 2                  |
| Virus | Banana streak OL virus                               | 3               | 7               | DNA          | 2                  |
| Virus | Banana streak UA virus                               | 3               | 7               | DNA          | 2                  |
| Virus | Banana streak UI virus                               | 3               | 7               | DNA          | 2                  |
| Virus | Banana streak UL virus                               | 3               | 7               | DNA          | 2                  |
| Virus | Banana streak UM virus                               | 3               | 7               | DNA          | 2                  |
| Virus | Banana streak virus                                  | 3               | 7               | DNA          | 2                  |
| Virus | Banana streak virus strain Acuminata Vietnam         | 3               | 7               | DNA          | 2                  |
| Virus | Bandicoot papillomatosis carcinomatosis virus type 1 | 3               | 1               | DNA          | 3                  |
| Virus | Bandicoot papillomatosis carcinomatosis virus type 2 | 3               | 1               | DNA          | 3                  |
| Virus | Banna virus                                          | 12              | 3               | RNA          | NA                 |
| Virus | Barbel circovirus                                    | 2               | 2               | DNA          | 3                  |
| Virus | Barfin flounder nervous necrosis virus               | 3               | 4               | RNA          | 1                  |
| Virus | Barfin flounder virus BF93Hok                        | 3               | 4               | RNA          | 1                  |
| Virus | Barley dwarf virus                                   | 4               | 2               | DNA          | 3                  |
| Virus | Barley mild mosaic virus                             | 13              | 4               | RNA          | 1                  |
| Virus | Barley stripe mosaic virus                           | 7               | 4               | RNA          | 1                  |
| Virus | Barley yellow dwarf virus - MAV                      | 6               | 4               | RNA          | 1                  |
| Virus | Barley yellow dwarf virus-GAV                        | 6               | 4               | RNA          | 1                  |
| Virus | Barley yellow dwarf virus-PAS                        | 6               | 4               | RNA          | 1                  |
| Virus | Barley yellow dwarf virus-PAV                        | 7               | 4               | RNA          | 1                  |
| Virus | Barley yellow mosaic virus                           | 13              | 4               | RNA          | 1                  |
| Virus | Barmah Forest virus                                  | 13              | 4               | RNA          | 1                  |
| Virus | Basella rugose mosaic virus                          | 12              | 4               | RNA          | 1                  |
| Virus | Bat adeno-associated virus YNM                       | 2               | 2               | DNA          | 3                  |
| Virus | Bat adenovirus 2                                     | 30              | 1               | DNA          | NA                 |
| Virus | Bat adenovirus TJM                                   | 30              | 1               | DNA          | NA                 |
| Virus | Bat coronavirus (BtCoV/133/2005)                     | 8               | 4               | RNA          | NA                 |
| Virus | Bat coronavirus 1A                                   | 7               | 4               | RNA          | NA                 |
| Virus | Bat coronavirus 1B                                   | 7               | 4               | RNA          | NA                 |
| Virus | Bat coronavirus BM48-31/BGR/2008                     | 9               | 4               | RNA          | NA                 |
| Virus | Bat coronavirus HKU2                                 | 8               | 4               | RNA          | NA                 |
| Virus | Bat coronavirus HKU4                                 | 9               | 4               | RNA          | NA                 |
| Virus | Bat coronavirus HKU5                                 | 9               | 4               | RNA          | NA                 |

| Type  | Name                                                      | Number of genes | Baltimore class | Nucleic Acid | Monophyletic group |
|-------|-----------------------------------------------------------|-----------------|-----------------|--------------|--------------------|
| Virus | Bat coronavirus HKU8                                      | 8               | 4               | RNA          | NA                 |
| Virus | Bat coronavirus HKU9                                      | 8               | 4               | RNA          | NA                 |
| Virus | Bat hepevirus                                             | 3               | 4               | RNA          | 1                  |
| Virus | Bat picornavirus 1                                        | 15              | 4               | RNA          | 1                  |
| Virus | Bat picornavirus 2                                        | 15              | 4               | RNA          | 1                  |
| Virus | Bat picornavirus 3                                        | 13              | 4               | RNA          | 1                  |
| Virus | Bat sapovirus TLC58/HK                                    | 2               | 4               | RNA          | 1                  |
| Virus | Bathycoccus sp. RCC1105 virus BpV1                        | 203             | 1               | DNA          | 5                  |
| Virus | Bdellovibrio phage phi1402                                | 42              | 1               | DNA          | 4                  |
| Virus | Bdellovibrio phage phiMH2K                                | 11              | 2               | DNA          | NA                 |
| Virus | Beak and feather disease virus                            | 3               | 2               | DNA          | 3                  |
| Virus | Bean calico mosaic virus                                  | 7               | 2               | DNA          | 3                  |
| Virus | Bean common mosaic necrosis virus                         | 12              | 4               | RNA          | 1                  |
| Virus | Bean common mosaic virus                                  | 12              | 4               | RNA          | 1                  |
| Virus | Bean dwarf mosaic virus                                   | 6               | 2               | DNA          | 3                  |
| Virus | Bean golden mosaic virus                                  | 6               | 2               | DNA          | 3                  |
| Virus | Bean golden yellow mosaic virus                           | 8               | 2               | DNA          | 3                  |
| Virus | Bean leafroll virus                                       | 5               | 4               | RNA          | 1                  |
| Virus | Bean necrotic mosaic virus                                | 5               | 5               | RNA          | NA                 |
| Virus | Bean pod mottle virus                                     | 11              | 4               | RNA          | 1                  |
| Virus | Bean yellow disorder virus                                | 15              | 4               | RNA          | 1                  |
| Virus | Bean yellow dwarf virus                                   | 4               | 2               | DNA          | 3                  |
| Virus | Bean yellow mosaic Mexico virus                           | 4               | 2               | DNA          | 3                  |
| Virus | Bean yellow mosaic virus                                  | 12              | 4               | RNA          | 1                  |
| Virus | Bear Canyon virus                                         | 4               | 5               | RNA          | NA                 |
| Virus | Bebaru virus                                              | 2               | 4               | RNA          | 1                  |
| Virus | Beet black scorch virus                                   | 6               | 4               | RNA          | 1                  |
| Virus | Beet chlorosis virus                                      | 5               | 4               | RNA          | 1                  |
| Virus | Beet cryptic virus 1                                      | 2               | 3               | RNA          | 1                  |
| Virus | Beet curly top Iran virus                                 | 5               | 2               | DNA          | 3                  |
| Virus | Beet curly top virus                                      | 6               | 2               | DNA          | 3                  |
| Virus | Beet mild curly top virus                                 | 7               | 2               | DNA          | 3                  |
| Virus | Beet mild yellowing virus                                 | 6               | 4               | RNA          | 1                  |
| Virus | Beet mosaic virus                                         | 12              | 4               | RNA          | 1                  |
| Virus | Beet necrotic yellow vein virus                           | 12              | 4               | RNA          | 1                  |
| Virus | Beet pseudo-yellow virus                                  | 12              | 4               | RNA          | 1                  |
| Virus | Beet ringspot virus                                       | 9               | 4               | RNA          | 1                  |
| Virus | Beet severe curly top virus                               | 8               | 2               | DNA          | 3                  |
| Virus | Beet soil-borne mosaic virus                              | 10              | 4               | RNA          | 1                  |
| Virus | Beet soil-borne virus                                     | 7               | 4               | RNA          | 1                  |
| Virus | Beet virus Q                                              | 9               | 4               | RNA          | 1                  |
| Virus | Beet western yellows ST9 associated virus                 | 4               | 4               | RNA          | NA                 |
| Virus | Beet western yellows virus                                | 6               | 4               | RNA          | 1                  |
| Virus | Beet yellows virus                                        | 10              | 4               | RNA          | 1                  |
| Virus | Beilong virus                                             | 11              | 5               | RNA          | NA                 |
| Virus | Bell pepper endornavirus                                  | 1               | 3               | RNA          | NA                 |
| Virus | Bell pepper mottle virus                                  | 5               | 4               | RNA          | 1                  |
| Virus | Beluga Whale coronavirus SW1                              | 14              | 4               | RNA          | NA                 |
| Virus | Bettongia penicillata papillomavirus 1                    | 7               | 1               | DNA          | 3                  |
| Virus | Bhendi yellow vein Bhubhaneswar virus                     | 7               | 2               | DNA          | 3                  |
| Virus | Bhendi yellow vein mosaic virus                           | 7               | 2               | DNA          | 3                  |
| Virus | Bhendi yellow vein mosaic virus satellite DNA beta        | 1               | NA              | NA           | NA                 |
| Virus | Bhendi yellow vein mosaic virus-associated alphasatellite | 1               | NA              | NA           | NA                 |
| Virus | Bidens mottle virus                                       | 12              | 4               | RNA          | 1                  |
| Virus | Bitter gourd leaf curl betasatellite                      | 1               | 2               | DNA          | NA                 |
| Virus | BK polyomavirus                                           | 6               | 1               | DNA          | 3                  |
| Virus | Black beetle virus                                        | 5               | 4               | RNA          | 1                  |
| Virus | Black queen cell virus                                    | 2               | 4               | RNA          | 1                  |
| Virus | Black raspberry necrosis virus                            | 10              | 4               | RNA          | 1                  |
| Virus | Black raspberry virus F                                   | 2               | 3               | RNA          | NA                 |
| Virus | Blackberry chlorotic ringspot virus                       | 5               | 4               | RNA          | 1                  |
| Virus | Blackberry virus E                                        | 5               | 4               | RNA          | 1                  |
| Virus | Blackberry virus Y                                        | 12              | 4               | RNA          | 1                  |
| Virus | Blackberry yellow vein-associated virus                   | 13              | 4               | RNA          | 1                  |
| Virus | Blackcurrant reversion virus                              | 9               | 4               | RNA          | 1                  |
| Virus | Blackcurrant reversion virus satellite RNA                | 1               | NA              | RNA          | NA                 |
| Virus | Blainvillea yellow spot virus                             | 7               | 2               | DNA          | 3                  |
| Virus | Blattella germanica densovirus                            | 5               | 2               | DNA          | 3                  |
| Virus | Blechnum interveinal chlorosis virus                      | 7               | 2               | DNA          | 3                  |
| Virus | Blotched snakehead virus                                  | 11              | 3               | RNA          | NA                 |
| Virus | Blue squill virus A                                       | 11              | 4               | RNA          | 1                  |
| Virus | Blueberry latent virus                                    | 2               | 3               | RNA          | NA                 |
| Virus | Blueberry necrotic ring blotch virus                      | 7               | 4               | RNA          | NA                 |
| Virus | Blueberry red ringspot virus                              | 8               | 7               | DNA          | 2                  |
| Virus | Blueberry scorch virus                                    | 6               | 4               | RNA          | 1                  |
| Virus | Blueberry virus A                                         | 11              | 4               | RNA          | 1                  |
| Virus | Bluegill picornavirus                                     | 12              | 4               | RNA          | 1                  |
| Virus | Bluetongue virus                                          | 11              | 3               | RNA          | NA                 |
| Virus | Bocavirus gorilla/GBoV1/2009                              | 4               | 2               | DNA          | 3                  |
| Virus | Bombyx mandarina nucleopolyhedrovirus                     | 141             | 1               | DNA          | NA                 |

| Type  | Name                                                    | Number of genes | Baltimore class | Nucleic Acid | Monophyletic group |
|-------|---------------------------------------------------------|-----------------|-----------------|--------------|--------------------|
| Virus | Bombyx mori densovirus 5                                | 6               | 2               | DNA          | 3                  |
| Virus | Bombyx mori Macula-like virus                           | 3               | 4               | RNA          | NA                 |
| Virus | Bombyx mori NPV                                         | 143             | 1               | DNA          | NA                 |
| Virus | Boolarra virus                                          | 3               | 4               | RNA          | 1                  |
| Virus | Border disease virus                                    | 14              | 4               | RNA          | 1                  |
| Virus | Bordetella phage BIP-1                                  | 48              | 1               | DNA          | 4                  |
| Virus | Bordetella phage BMP-1                                  | 47              | 1               | DNA          | 4                  |
| Virus | Bordetella phage BPP-1                                  | 49              | 1               | DNA          | 4                  |
| Virus | Borna disease virus                                     | 6               | 5               | RNA          | NA                 |
| Virus | Botryotinia fuckeliana partitivirus 1                   | 3               | 3               | RNA          | 1                  |
| Virus | Botryotinia fuckeliana totivirus 1                      | 2               | 3               | RNA          | NA                 |
| Virus | Botrytis cinerea debilitation-related virus             | 1               | 4               | RNA          | 1                  |
| Virus | Botrytis porri RNA virus 1                              | 2               | 3               | RNA          | NA                 |
| Virus | Botrytis virus F                                        | 2               | 4               | RNA          | 1                  |
| Virus | Botrytis virus X                                        | 5               | 4               | RNA          | 1                  |
| Virus | Bougainvillea spectabilis chlorotic vein-banding virus  | 4               | 7               | DNA          | 2                  |
| Virus | Bovine adeno-associated virus                           | 2               | 2               | DNA          | 3                  |
| Virus | Bovine adenovirus A                                     | 29              | 1               | DNA          | NA                 |
| Virus | Bovine adenovirus B                                     | 52              | 1               | DNA          | NA                 |
| Virus | Bovine adenovirus D                                     | 36              | 1               | DNA          | NA                 |
| Virus | Bovine coronavirus                                      | 27              | 4               | RNA          | NA                 |
| Virus | Bovine enterovirus                                      | 12              | 4               | RNA          | 1                  |
| Virus | Bovine ephemeral fever virus                            | 12              | 5               | RNA          | NA                 |
| Virus | Bovine foamy virus                                      | 5               | 6               | RNA          | 2                  |
| Virus | Bovine herpesvirus 1                                    | 70              | 1               | DNA          | NA                 |
| Virus | Bovine herpesvirus 4                                    | 79              | 1               | DNA          | NA                 |
| Virus | Bovine herpesvirus 5                                    | 70              | 1               | DNA          | NA                 |
| Virus | Bovine hungarovirus                                     | 13              | 4               | RNA          | 1                  |
| Virus | Bovine immunodeficiency virus                           | 5               | 6               | RNA          | 2                  |
| Virus | Bovine kobuvirus                                        | 12              | 4               | RNA          | 1                  |
| Virus | Bovine leukemia virus                                   | 14              | 6               | RNA          | 2                  |
| Virus | Bovine papillomavirus - 1                               | 8               | 1               | DNA          | 3                  |
| Virus | Bovine papillomavirus - 5                               | 6               | 1               | DNA          | 3                  |
| Virus | Bovine papillomavirus 7                                 | 7               | 1               | DNA          | 3                  |
| Virus | Bovine papillomavirus 8                                 | 8               | 1               | DNA          | 3                  |
| Virus | Bovine papular stomatitis virus                         | 131             | 1               | DNA          | 5                  |
| Virus | Bovine parainfluenza virus 3                            | 6               | 5               | RNA          | NA                 |
| Virus | Bovine parvovirus                                       | 4               | 2               | DNA          | 3                  |
| Virus | Bovine parvovirus - 2                                   | 2               | 2               | DNA          | 3                  |
| Virus | Bovine polyomavirus                                     | 6               | 1               | DNA          | 3                  |
| Virus | Bovine respiratory coronavirus AH187                    | 12              | 4               | RNA          | NA                 |
| Virus | Bovine respiratory coronavirus bovine/US/OH-440-TC/1996 | 11              | 4               | RNA          | NA                 |
| Virus | Bovine respiratory syncytial virus                      | 11              | 5               | RNA          | NA                 |
| Virus | Bovine rhinitis B virus                                 | 13              | 4               | RNA          | 1                  |
| Virus | Bovine viral diarrhea virus 1                           | 14              | 4               | RNA          | 1                  |
| Virus | Bovine viral diarrhea virus 2                           | 14              | 4               | RNA          | 1                  |
| Virus | Bovine viral diarrhea virus 3 Th/04_KhonKaen            | 1               | 4               | RNA          | 1                  |
| Virus | Brassica yellows virus                                  | 6               | 4               | RNA          | 1                  |
| Virus | Breda virus                                             | 6               | 4               | RNA          | NA                 |
| Virus | Brevicoryne brassicae picorna-like virus                | 1               | 4               | RNA          | 1                  |
| Virus | Broad bean mottle virus                                 | 4               | 4               | RNA          | 1                  |
| Virus | Broad bean necrosis virus                               | 8               | 4               | RNA          | 1                  |
| Virus | Broad bean wilt virus 1                                 | 10              | 4               | RNA          | 1                  |
| Virus | Broad bean wilt virus 2                                 | 10              | 4               | RNA          | 1                  |
| Virus | Brochothrix phage A9                                    | 199             | 1               | DNA          | 4                  |
| Virus | Brochothrix phage BL3                                   | 67              | 1               | DNA          | 4                  |
| Virus | Brochothrix phage NF5                                   | 58              | 1               | DNA          | 4                  |
| Virus | Brome mosaic virus                                      | 4               | 4               | RNA          | 1                  |
| Virus | Brome streak mosaic virus                               | 12              | 4               | RNA          | 1                  |
| Virus | Bromus catharticus striate mosaic virus                 | 4               | 2               | DNA          | 3                  |
| Virus | Broome virus                                            | 11              | 3               | RNA          | NA                 |
| Virus | Brugmansia mild mottle virus                            | 4               | 4               | RNA          | 1                  |
| Virus | Brugmansia suaveolens mottle virus                      | 12              | 4               | RNA          | 1                  |
| Virus | Budgerigar fledgling disease virus - 1                  | 9               | 1               | DNA          | NA                 |
| Virus | Bundibugyo ebolavirus                                   | 9               | 5               | RNA          | NA                 |
| Virus | Bunyamwera virus                                        | 4               | 5               | RNA          | NA                 |
| Virus | Burkholderia phage AH2                                  | 78              | 1               | DNA          | 4                  |
| Virus | Burkholderia phage Bcep1                                | 71              | 1               | DNA          | 4                  |
| Virus | Burkholderia phage Bcep176                              | 81              | 1               | DNA          | 4                  |
| Virus | Burkholderia phage Bcep22                               | 81              | 1               | DNA          | 4                  |
| Virus | Burkholderia phage Bcep43                               | 65              | 1               | DNA          | 4                  |
| Virus | Burkholderia phage Bcep781                              | 66              | 1               | DNA          | 4                  |
| Virus | Burkholderia phage BcepB1A                              | 73              | 1               | DNA          | 4                  |
| Virus | Burkholderia phage BcepC6B                              | 46              | 1               | DNA          | 4                  |
| Virus | Burkholderia phage BcepF1                               | 127             | 1               | DNA          | 4                  |
| Virus | Burkholderia phage BcepGomr                             | 75              | 1               | DNA          | 4                  |
| Virus | Burkholderia phage BcepIL02                             | 76              | 1               | DNA          | 4                  |
| Virus | Burkholderia phage BcepMu                               | 53              | 1               | DNA          | 4                  |
| Virus | Burkholderia phage BcepNazgul                           | 73              | 1               | DNA          | 4                  |
| Virus | Burkholderia phage BcepNY3                              | 70              | 1               | DNA          | 4                  |

| Type  | Name                                         | Number of genes | Baltimore class | Nucleic Acid | Monophyletic group |
|-------|----------------------------------------------|-----------------|-----------------|--------------|--------------------|
| Virus | Burkholderia phage DC1                       | 73              | 1               | DNA          | 4                  |
| Virus | Burkholderia phage KL1                       | 55              | 1               | DNA          | 4                  |
| Virus | Burkholderia phage KL3                       | 52              | 1               | DNA          | 4                  |
| Virus | Burkholderia phage KS10                      | 49              | 1               | DNA          | 4                  |
| Virus | Burkholderia phage KS14                      | 44              | 1               | DNA          | 4                  |
| Virus | Burkholderia phage KS5                       | 46              | 1               | DNA          | 4                  |
| Virus | Burkholderia phage KS9                       | 50              | 1               | DNA          | 4                  |
| Virus | Burkholderia phage phi1026b                  | 83              | 1               | DNA          | 4                  |
| Virus | Burkholderia phage phi52237                  | 47              | 1               | DNA          | 4                  |
| Virus | Burkholderia phage phi644-2                  | 71              | 1               | DNA          | 4                  |
| Virus | Burkholderia phage phiE12-2                  | 50              | 1               | DNA          | 4                  |
| Virus | Burkholderia phage phiE125                   | 71              | 1               | DNA          | 4                  |
| Virus | Burkholderia phage phiE202                   | 48              | 1               | DNA          | 4                  |
| Virus | Burkholderia phage phiE255                   | 55              | 1               | DNA          | 4                  |
| Virus | Butterbur mosaic virus                       | 6               | 4               | RNA          | 1                  |
| Virus | Cabbage leaf curl virus                      | 7               | 2               | DNA          | 3                  |
| Virus | Cacao swollen shoot virus                    | 5               | 7               | DNA          | 2                  |
| Virus | Cactus mild mottle virus                     | 4               | 4               | RNA          | 1                  |
| Virus | Cactus virus X                               | 7               | 4               | RNA          | 1                  |
| Virus | Cafeteria roenbergensis virus BV-PW1         | 552             | 1               | DNA          | 5                  |
| Virus | Caladenia virus A                            | 11              | 4               | RNA          | 1                  |
| Virus | Calicivirus isolate TCG                      | 2               | 4               | RNA          | 1                  |
| Virus | Calicivirus pig/AB90/CAN                     | 2               | 4               | RNA          | 1                  |
| Virus | Calicivirus strain NB                        | 2               | 4               | RNA          | 1                  |
| Virus | California sea lion anellovirus              | 3               | 2               | DNA          | NA                 |
| Virus | California sea lion polyomavirus 1           | 6               | 1               | DNA          | 3                  |
| Virus | Callitrichine herpesvirus 3                  | 72              | 1               | DNA          | NA                 |
| Virus | Camelpox virus                               | 211             | 1               | DNA          | 5                  |
| Virus | Camelus dromedarius papillomavirus type 1    | 7               | 1               | DNA          | 3                  |
| Virus | Camelus dromedarius papillomavirus type 2    | 7               | 1               | DNA          | 3                  |
| Virus | Campoletis sonorensis ichnovirus             | 5               | 1               | DNA          | NA                 |
| Virus | Campylobacter phage CP30A                    | 162             | NA              | NA           | NA                 |
| Virus | Campylobacter phage CPX                      | 149             | 1               | DNA          | 4                  |
| Virus | Campylobacter phage NCTC12673                | 166             | 1               | DNA          | 4                  |
| Virus | Canary circovirus                            | 2               | 2               | DNA          | 3                  |
| Virus | Canary polyomavirus                          | 5               | 1               | DNA          | 3                  |
| Virus | Canarypox virus                              | 328             | 1               | DNA          | 5                  |
| Virus | Candiru virus                                | 4               | 5               | RNA          | NA                 |
| Virus | Canine adenovirus 1                          | 31              | 1               | DNA          | NA                 |
| Virus | Canine adenovirus 2                          | 31              | 1               | DNA          | NA                 |
| Virus | Canine adenovirus A                          | 30              | 1               | DNA          | NA                 |
| Virus | Canine calicivirus                           | 12              | 4               | RNA          | 1                  |
| Virus | Canine distemper virus                       | 7               | 5               | RNA          | NA                 |
| Virus | Canine minute virus                          | 4               | 2               | DNA          | 3                  |
| Virus | Canine papillomavirus 10                     | 7               | 1               | DNA          | 3                  |
| Virus | Canine papillomavirus 11                     | 8               | 1               | DNA          | 3                  |
| Virus | Canine papillomavirus 3                      | 6               | 1               | DNA          | 3                  |
| Virus | Canine papillomavirus 4                      | 6               | 1               | DNA          | 3                  |
| Virus | Canine papillomavirus 5                      | 7               | 1               | DNA          | 3                  |
| Virus | Canine papillomavirus 8                      | 7               | 1               | DNA          | 3                  |
| Virus | Canine papillomavirus 9                      | 7               | 1               | DNA          | 3                  |
| Virus | Canine parvovirus                            | 5               | 2               | DNA          | 3                  |
| Virus | Canine picornavirus                          | 13              | 4               | RNA          | 1                  |
| Virus | Canis familiaris papillomavirus 2            | 8               | 1               | DNA          | 3                  |
| Virus | Canna Yellow Streak Virus                    | 12              | 4               | RNA          | 1                  |
| Virus | Capra hircus papillomavirus 1                | 7               | 1               | DNA          | 3                  |
| Virus | Capreolus capreolus papillomavirus 1         | 8               | 1               | DNA          | 3                  |
| Virus | Caprine arthritis-encephalitis virus         | 6               | 6               | RNA          | 2                  |
| Virus | Capsicum chlorosis virus                     | 5               | 5               | RNA          | NA                 |
| Virus | Cardamine chlorotic fleck virus              | 4               | 4               | RNA          | 1                  |
| Virus | Cardiospermum yellow leaf curl betasatellite | 1               | 2               | DNA          | 3                  |
| Virus | Caretta caretta papillomavirus 1             | 7               | 1               | DNA          | 3                  |
| Virus | Carnation etched ring virus                  | 6               | 7               | DNA          | 2                  |
| Virus | Carnation Italian ringspot virus             | 5               | 4               | RNA          | 1                  |
| Virus | Carnation mottle virus                       | 6               | 4               | RNA          | 1                  |
| Virus | Carnation ringspot virus                     | 4               | 4               | RNA          | 1                  |
| Virus | Carrot mottle mimic virus                    | 4               | 4               | RNA          | 1                  |
| Virus | Carrot mottle virus                          | 3               | 4               | RNA          | 1                  |
| Virus | Carrot red leaf luteovirus associated RNA    | 3               | 4               | RNA          | NA                 |
| Virus | Carrot red leaf virus                        | 6               | 4               | RNA          | 1                  |
| Virus | Carrot yellow leaf virus                     | 10              | 4               | RNA          | 1                  |
| Virus | CAS virus                                    | 4               | 5               | RNA          | NA                 |
| Virus | Casphalia extranea densovirus                | 3               | 2               | DNA          | 3                  |
| Virus | Cassava brown streak virus                   | 12              | 4               | RNA          | 1                  |
| Virus | Cassava common mosaic virus                  | 5               | 4               | RNA          | 1                  |
| Virus | Cassava mosaic Madagascar alphasatellite     | 1               | NA              | NA           | NA                 |
| Virus | Cassava mosaic Madagascar virus              | 8               | 2               | DNA          | 3                  |
| Virus | Cassava vein mosaic virus                    | 5               | 7               | DNA          | 2                  |
| Virus | Cassava virus C                              | 3               | 4               | RNA          | 1                  |
| Virus | Cassia yellow blotch virus                   | 4               | 4               | RNA          | 1                  |

| Type  | Name                                            | Number of genes | Baltimore class | Nucleic Acid | Monophyletic group |
|-------|-------------------------------------------------|-----------------|-----------------|--------------|--------------------|
| Virus | Cauliflower mosaic virus                        | 7               | 7               | DNA          | 2                  |
| Virus | Caulobacter phage CcrColossus                   | 452             | 1               | DNA          | 4                  |
| Virus | Caulobacter phage CcrKarma                      | 357             | 1               | DNA          | 4                  |
| Virus | Caulobacter phage CcrMagneto                    | 351             | 1               | DNA          | 4                  |
| Virus | Caulobacter phage CcrRogue                      | 354             | 1               | DNA          | 4                  |
| Virus | Caulobacter phage CcrSwift                      | 347             | 1               | DNA          | 4                  |
| Virus | Caulobacter phage phiCbK                        | 342             | 1               | DNA          | 4                  |
| Virus | Cavally virus                                   | 7               | 4               | RNA          | 1                  |
| Virus | Caviid herpesvirus 2                            | 106             | 1               | DNA          | NA                 |
| Virus | Celeribacter phage P12053L                      | 56              | 1               | DNA          | NA                 |
| Virus | Celery mosaic virus                             | 12              | 4               | RNA          | 1                  |
| Virus | Cell fusing agent virus                         | 14              | 4               | RNA          | 1                  |
| Virus | Centrosema yellow spot virus                    | 5               | 2               | DNA          | 3                  |
| Virus | Ceratocystis polonica partitivirus              | 2               | 3               | RNA          | 1                  |
| Virus | Ceratocystis resinifera partitivirus            | 2               | 3               | RNA          | 1                  |
| Virus | Cercopithecine herpesvirus 2                    | 75              | 1               | DNA          | NA                 |
| Virus | Cercopithecine herpesvirus 5                    | 183             | 1               | DNA          | NA                 |
| Virus | Cercopithecine herpesvirus 9                    | 74              | 1               | DNA          | NA                 |
| Virus | Cereal yellow dwarf virus - RPV                 | 6               | 4               | RNA          | 1                  |
| Virus | Cereal yellow dwarf virus-RPS                   | 6               | 4               | RNA          | 1                  |
| Virus | Cestrum yellow leaf curling virus               | 7               | 7               | DNA          | 2                  |
| Virus | Chaetoceros lorenzianus DNA Virus               | 3               | NA              | DNA          | NA                 |
| Virus | Chaetoceros salsugineum DNA virus               | 6               | NA              | DNA          | NA                 |
| Virus | Chaetoceros socialis f. radians RNA virus 01    | 2               | 4               | RNA          | 1                  |
| Virus | Chaetoceros tenuissimus DNA virus               | 3               | NA              | DNA          | NA                 |
| Virus | Chalara elegans RNA Virus 1                     | 2               | 3               | RNA          | NA                 |
| Virus | Chaoyang virus                                  | 1               | 4               | RNA          | 1                  |
| Virus | Chapare virus                                   | 4               | 5               | RNA          | NA                 |
| Virus | Chayote mosaic virus                            | 3               | 4               | RNA          | 1                  |
| Virus | Chayote yellow mosaic virus                     | 5               | 2               | DNA          | 3                  |
| Virus | Chelonia mydas papillomavirus 1                 | 7               | 1               | DNA          | 3                  |
| Virus | Cherry green ring mottle virus                  | 3               | 4               | RNA          | 1                  |
| Virus | Cherry leaf roll virus                          | 2               | 4               | RNA          | 1                  |
| Virus | Cherry mottle leaf virus                        | 4               | 4               | RNA          | 1                  |
| Virus | Cherry necrotic rusty mottle virus              | 7               | 4               | RNA          | 1                  |
| Virus | Cherry rasp leaf virus                          | 11              | 4               | RNA          | 1                  |
| Virus | Cherry virus A                                  | 2               | 4               | RNA          | 1                  |
| Virus | Chicken anemia virus                            | 4               | 2               | DNA          | 3                  |
| Virus | Chicken astrovirus                              | 2               | 4               | RNA          | 1                  |
| Virus | Chickpea chlorosis virus-A                      | 4               | 2               | DNA          | 3                  |
| Virus | Chickpea chlorotic dwarf Sudan virus            | 4               | 2               | DNA          | 3                  |
| Virus | Chickpea chlorotic dwarf virus                  | 4               | 2               | DNA          | 3                  |
| Virus | Chickpea chlorotic stunt virus                  | 6               | 4               | RNA          | 1                  |
| Virus | Chickpea redleaf virus                          | 4               | 2               | DNA          | 3                  |
| Virus | Chicory yellow mottle virus large satellite RNA | 1               | NA              | RNA          | NA                 |
| Virus | Chicory yellow mottle virus satellite RNA       | 1               | NA              | RNA          | NA                 |
| Virus | Chicory yellow mottle virus satellite RNA L1    | 1               | NA              | NA           | NA                 |
| Virus | Chikungunya virus                               | 4               | 4               | RNA          | 1                  |
| Virus | Chilli leaf curl Multan alphasatellite          | 1               | 2               | DNA          | NA                 |
| Virus | Chilli leaf curl virus                          | 6               | 2               | DNA          | 3                  |
| Virus | Chilli leaf curl virus satellite DNA beta       | 1               | 2               | DNA          | 3                  |
| Virus | Chilli ringspot virus                           | 12              | 4               | RNA          | 1                  |
| Virus | Chilli veinal mottle virus                      | 12              | 4               | RNA          | 1                  |
| Virus | Chiltepin yellow mosaic virus                   | 3               | 4               | RNA          | 1                  |
| Virus | Chimpanzee adenovirus Y25                       | 31              | 1               | DNA          | NA                 |
| Virus | Chimpanzee polyomavirus                         | 5               | 1               | DNA          | 3                  |
| Virus | Chinese wheat mosaic virus                      | 7               | 4               | RNA          | 1                  |
| Virus | Chinese yam necrotic mosaic virus               | 10              | 4               | RNA          | 1                  |
| Virus | Chino del tomate virus                          | 7               | 2               | DNA          | 3                  |
| Virus | Chlamydia phage 3                               | 8               | 2               | DNA          | NA                 |
| Virus | Chlamydia phage 4                               | 8               | 2               | DNA          | NA                 |
| Virus | Chlamydia phage Chp1                            | 12              | 2               | DNA          | NA                 |
| Virus | Chlamydia phage Chp2                            | 8               | 2               | DNA          | NA                 |
| Virus | Chlamydia phage CPAR39                          | 7               | 2               | DNA          | NA                 |
| Virus | Chlamydia phage phiCPG1                         | 9               | 2               | DNA          | NA                 |
| Virus | Chloris striate mosaic virus                    | 5               | 2               | DNA          | 3                  |
| Virus | Chocolate lily virus A                          | 9               | 4               | RNA          | 1                  |
| Virus | Choristoneura fumiferana DEF MNPV               | 149             | 1               | DNA          | NA                 |
| Virus | Choristoneura fumiferana MNPV                   | 146             | 1               | DNA          | NA                 |
| Virus | Choristoneura occidentalis granulovirus         | 116             | 1               | DNA          | NA                 |
| Virus | Chronic bee paralysis virus                     | 7               | 4               | RNA          | NA                 |
| Virus | Chrysanthemum virus B                           | 6               | 4               | RNA          | 1                  |
| Virus | Chrysodeixis chalcites nucleopolyhedrovirus     | 151             | 1               | DNA          | NA                 |
| Virus | Circovirus-like genome BBC-A                    | 2               | 2               | DNA          | NA                 |
| Virus | Circovirus-like genome CB-A                     | 2               | 2               | DNA          | NA                 |
| Virus | Circovirus-like genome CB-B                     | 3               | 2               | DNA          | NA                 |
| Virus | Circovirus-like genome RW-A                     | 3               | 2               | DNA          | NA                 |
| Virus | Circovirus-like genome RW-B                     | 2               | 2               | DNA          | NA                 |
| Virus | Circovirus-like genome RW-C                     | 2               | 2               | DNA          | NA                 |
| Virus | Circovirus-like genome RW-D                     | 2               | 2               | DNA          | NA                 |

| Type  | Name                                       | Number of genes | Baltimore class | Nucleic Acid | Monophyletic group |
|-------|--------------------------------------------|-----------------|-----------------|--------------|--------------------|
| Virus | Circovirus-like genome RW-E                | 2               | 2               | DNA          | NA                 |
| Virus | Circovirus-like genome SAR-A               | 2               | 2               | DNA          | NA                 |
| Virus | Circovirus-like genome SAR-B               | 2               | 2               | DNA          | NA                 |
| Virus | Circulifer tenellus virus 1                | 2               | 3               | RNA          | NA                 |
| Virus | Citrus chlorotic dwarf associated virus    | 5               | 2               | DNA          | 3                  |
| Virus | Citrus leaf blotch virus                   | 3               | 4               | RNA          | 1                  |
| Virus | Citrus leaf rugose virus                   | 5               | 4               | RNA          | 1                  |
| Virus | Citrus leprosis virus C                    | 10              | 4               | RNA          | 1                  |
| Virus | Citrus psorosis virus                      | 4               | 5               | RNA          | NA                 |
| Virus | Citrus sudden death-associated virus       | 6               | 4               | RNA          | 1                  |
| Virus | Citrus tristeza virus                      | 14              | 4               | RNA          | 1                  |
| Virus | Citrus variegation virus                   | 5               | 4               | RNA          | 1                  |
| Virus | Citrus yellow mosaic virus                 | 6               | 7               | DNA          | 2                  |
| Virus | Clanis bilineata nucleopolyhedrosis virus  | 129             | 1               | DNA          | NA                 |
| Virus | Classical swine fever virus                | 14              | 4               | RNA          | 1                  |
| Virus | Clavibacter phage CMP1                     | 74              | 1               | DNA          | 4                  |
| Virus | Cleome golden mosaic virus                 | 3               | 2               | DNA          | 3                  |
| Virus | Cleome leaf crumple virus                  | 7               | 2               | DNA          | 3                  |
| Virus | Cleome leaf crumple virus associated DNA 1 | 1               | NA              | NA           | NA                 |
| Virus | Clerodendron yellow mosaic virus           | 6               | 2               | DNA          | 3                  |
| Virus | Clerodendrum golden mosaic China virus     | 8               | 2               | DNA          | 3                  |
| Virus | Clerodendrum golden mosaic virus           | 8               | 2               | DNA          | 3                  |
| Virus | Clitocybe odora virus                      | 1               | 4               | RNA          | 1                  |
| Virus | Clitoria yellow mottle virus               | 4               | 4               | RNA          | 1                  |
| Virus | Clostera anachoreta granulovirus           | 123             | 1               | DNA          | NA                 |
| Virus | Clostridium phage c-st                     | 198             | 1               | DNA          | 4                  |
| Virus | Clostridium phage D-1873                   | 145             | NA              | DNA          | NA                 |
| Virus | Clostridium phage phi3626                  | 51              | 1               | DNA          | 4                  |
| Virus | Clostridium phage phiC2                    | 82              | 1               | DNA          | 4                  |
| Virus | Clostridium phage phiCD119                 | 79              | 1               | DNA          | 4                  |
| Virus | Clostridium phage phiCD27                  | 75              | 1               | DNA          | 4                  |
| Virus | Clostridium phage phiCD38-2                | 55              | 1               | DNA          | 4                  |
| Virus | Clostridium phage phiCD6356                | 59              | 1               | DNA          | 4                  |
| Virus | Clostridium phage phiCP39-O                | 62              | 1               | DNA          | 4                  |
| Virus | Clostridium phage phiCP7R                  | 26              | 1               | DNA          | 4                  |
| Virus | Clostridium phage phiCPV4                  | 28              | 1               | DNA          | 4                  |
| Virus | Clostridium phage phiCTP1                  | 86              | 1               | DNA          | 4                  |
| Virus | Clostridium phage phiMMP02                 | 76              | 1               | DNA          | 4                  |
| Virus | Clostridium phage phiMMP04                 | 51              | 1               | DNA          | 4                  |
| Virus | Clostridium phage PhiS63                   | 43              | 1               | DNA          | 4                  |
| Virus | Clostridium phage phiSM101                 | 53              | 1               | DNA          | NA                 |
| Virus | Clostridium phage phiZP2                   | 27              | 1               | DNA          | 4                  |
| Virus | Clover yellow mosaic virus                 | 5               | 4               | RNA          | 1                  |
| Virus | Clover yellow vein virus                   | 12              | 4               | RNA          | 1                  |
| Virus | Cocksfoot mild mosaic virus                | 6               | 4               | RNA          | 1                  |
| Virus | Cocksfoot mottle virus                     | 7               | 4               | RNA          | 1                  |
| Virus | Cocksfoot streak virus                     | 12              | 4               | RNA          | 1                  |
| Virus | Coconut foliar decay virus                 | 6               | 2               | DNA          | NA                 |
| Virus | Coleus vein necrosis virus                 | 6               | 4               | RNA          | 1                  |
| Virus | Colobus guereza papillomavirus type 2      | 6               | 1               | DNA          | 3                  |
| Virus | Colorado tick fever virus                  | 13              | 3               | RNA          | NA                 |
| Virus | Columbid circovirus                        | 5               | 2               | DNA          | 3                  |
| Virus | Colwellia phage 9A                         | 149             | 1               | DNA          | 4                  |
| Virus | Commelina yellow mottle virus              | 3               | 7               | DNA          | 2                  |
| Virus | Common chimpanzee papillomavirus 1         | 8               | 1               | DNA          | 3                  |
| Virus | Common-moorhen coronavirus HKU21           | 9               | 4               | RNA          | NA                 |
| Virus | Coniothyrium minitans RNA virus            | 2               | 3               | RNA          | NA                 |
| Virus | Corchorus golden mosaic virus              | 7               | 2               | DNA          | 3                  |
| Virus | Corchorus yellow spot virus                | 6               | 2               | DNA          | 3                  |
| Virus | Corynebacterium phage BFK20                | 56              | 1               | DNA          | 4                  |
| Virus | Corynebacterium phage P1201                | 97              | 1               | DNA          | 4                  |
| Virus | Cotesia congregata bracovirus              | 155             | 1               | DNA          | NA                 |
| Virus | Cotia virus SPAn232                        | 185             | 1               | DNA          | 5                  |
| Virus | Cotton leaf crumple virus                  | 6               | 2               | DNA          | 3                  |
| Virus | Cotton leaf curl Alabad virus              | 6               | 2               | DNA          | 3                  |
| Virus | Cotton leaf curl Bangalore betasatellite   | 1               | 2               | DNA          | NA                 |
| Virus | Cotton leaf curl Bangalore virus           | 6               | 2               | DNA          | 3                  |
| Virus | Cotton leaf curl betasatellite             | 1               | 2               | DNA          | NA                 |
| Virus | Cotton leaf curl Burewala alphasatellite   | 1               | 2               | DNA          | NA                 |
| Virus | Cotton leaf curl Burewala betasatellite    | 1               | 2               | DNA          | NA                 |
| Virus | Cotton leaf curl Burewala virus            | 5               | 2               | DNA          | 3                  |
| Virus | Cotton leaf curl Gezira alphasatellite     | 1               | 2               | DNA          | NA                 |
| Virus | Cotton leaf curl Gezira beta               | 1               | 2               | DNA          | NA                 |
| Virus | Cotton leaf curl Gezira betasatellite      | 2               | 2               | DNA          | 3                  |
| Virus | Cotton leaf curl Gezira virus              | 6               | 2               | DNA          | 3                  |
| Virus | Cotton leaf curl Kokhran virus             | 6               | 2               | DNA          | 3                  |
| Virus | Cotton leaf curl Multan alphasatellite     | 1               | NA              | NA           | NA                 |
| Virus | Cotton leaf curl Multan betasatellite      | 1               | 2               | DNA          | 3                  |
| Virus | Cotton leaf curl Multan virus              | 6               | 2               | DNA          | 3                  |
| Virus | Cotton leaf curl Rajasthan virus           | 6               | 2               | DNA          | 3                  |

| Type  | Name                                                    | Number of genes | Baltimore class | Nucleic Acid | Monophyletic group |
|-------|---------------------------------------------------------|-----------------|-----------------|--------------|--------------------|
| Virus | Cotton leaf curl virus                                  | 7               | 2               | DNA          | 3                  |
| Virus | Cotton leaf curl virus associated DNA 1 isolate Lucknow | 1               | NA              | NA           | NA                 |
| Virus | Cotton leaf curl virus betasatellite                    | 1               | NA              | NA           | NA                 |
| Virus | Cotton leafroll dwarf virus                             | 6               | 4               | RNA          | 1                  |
| Virus | Courdo7                                                 | 1337            | 1               | DNA          | 5                  |
| Virus | Cowpea aphid-borne mosaic virus                         | 12              | 4               | RNA          | 1                  |
| Virus | Cowpea chlorotic mottle virus                           | 4               | 4               | RNA          | 1                  |
| Virus | Cowpea mild mottle virus                                | 6               | 4               | RNA          | 1                  |
| Virus | Cowpea mosaic virus                                     | 12              | 4               | RNA          | 1                  |
| Virus | Cowpea mottle virus                                     | 6               | 4               | RNA          | 1                  |
| Virus | Cowpea severe leaf curl-associated DNA beta             | 1               | 2               | DNA          | 3                  |
| Virus | Cowpea severe mosaic virus                              | 10              | 4               | RNA          | 1                  |
| Virus | Cowpox virus                                            | 233             | 1               | DNA          | 5                  |
| Virus | Crassocephalum yellow vein virus - Jinghong             | 6               | 2               | DNA          | 3                  |
| Virus | Cricket paralysis virus                                 | 2               | 4               | RNA          | 1                  |
| Virus | Crimean-Congo hemorrhagic fever virus                   | 3               | 5               | RNA          | NA                 |
| Virus | Croceibacter phage P2559S                               | 68              | 1               | DNA          | NA                 |
| Virus | Crocodilepox virus                                      | 173             | 1               | DNA          | 5                  |
| Virus | Crocota crocuta papillomavirus 1                        | 7               | 1               | DNA          | 3                  |
| Virus | Cronobacter phage CR3                                   | 265             | 1               | DNA          | 4                  |
| Virus | Cronobacter phage phiES15                               | 52              | 1               | DNA          | 4                  |
| Virus | Cronobacter phage vB_CsaM_GAP161                        | 275             | 1               | DNA          | 4                  |
| Virus | Cronobacter phage vB_CsaM_GAP31                         | 269             | 1               | DNA          | 4                  |
| Virus | Cronobacter phage vB_CsaM_GAP32                         | 545             | 1               | DNA          | 4                  |
| Virus | Cronobacter phage vB_CsaP_GAP52                         | 115             | 1               | DNA          | 4                  |
| Virus | Croton yellow vein mosaic alphasatellite                | 1               | 2               | DNA          | NA                 |
| Virus | Croton yellow vein mosaic betasatellite                 | 1               | 2               | DNA          | 3                  |
| Virus | Croton yellow vein mosaic virus                         | 7               | 2               | DNA          | 3                  |
| Virus | Croton yellow vein virus                                | 6               | 2               | DNA          | 3                  |
| Virus | Crow polyomavirus                                       | 6               | 1               | DNA          | 3                  |
| Virus | Cryphonectria hypovirus 1                               | 2               | 3               | RNA          | NA                 |
| Virus | Cryphonectria hypovirus 2                               | 2               | 3               | RNA          | NA                 |
| Virus | Cryphonectria hypovirus 3                               | 1               | 3               | RNA          | NA                 |
| Virus | Cryphonectria hypovirus 4                               | 1               | 3               | RNA          | NA                 |
| Virus | Cryphonectria parasitica mitovirus 1-NB631              | 1               | 4               | RNA          | 1                  |
| Virus | Cryptophlebia leucotreta granulovirus                   | 128             | 1               | DNA          | NA                 |
| Virus | Cucumber Bulgarian latent virus                         | 5               | 4               | RNA          | 1                  |
| Virus | Cucumber fruit mottle mosaic virus                      | 3               | 4               | RNA          | 1                  |
| Virus | Cucumber green mottle mosaic virus                      | 4               | 4               | RNA          | 1                  |
| Virus | Cucumber leaf spot virus                                | 4               | 4               | RNA          | 1                  |
| Virus | Cucumber mosaic virus                                   | 5               | 4               | RNA          | 1                  |
| Virus | Cucumber mottle virus                                   | 4               | 4               | RNA          | 1                  |
| Virus | Cucumber necrosis virus                                 | 5               | 4               | RNA          | 1                  |
| Virus | Cucumber vein yellowing virus                           | 11              | 4               | RNA          | 1                  |
| Virus | Cucurbit aphid-borne yellows virus                      | 6               | 4               | RNA          | 1                  |
| Virus | Cucurbit chlorotic yellows virus                        | 13              | 4               | RNA          | 1                  |
| Virus | Cucurbit leaf crumple virus                             | 6               | 2               | DNA          | 3                  |
| Virus | Cucurbit yellow stunting disorder virus                 | 14              | 4               | RNA          | 1                  |
| Virus | Culex flavivirus                                        | 14              | 4               | RNA          | 1                  |
| Virus | Culex nigripalpus NPV                                   | 109             | 1               | DNA          | NA                 |
| Virus | Culex originated Tymoviridae-like virus                 | 2               | 4               | RNA          | 1                  |
| Virus | Culex pipiens densovirus                                | 4               | 2               | DNA          | 3                  |
| Virus | Cupixi virus                                            | 4               | 5               | RNA          | NA                 |
| Virus | Curvularia thermal tolerance virus                      | 4               | 3               | RNA          | NA                 |
| Virus | Cutthroat trout virus                                   | 7               | 4               | RNA          | 1                  |
| Virus | Cyanophage 9515-10a                                     | 55              | 1               | DNA          | 4                  |
| Virus | Cyanophage NATL1A-7                                     | 65              | 1               | DNA          | 4                  |
| Virus | Cyanophage NATL2A-133                                   | 62              | 1               | DNA          | 4                  |
| Virus | Cyanophage P-SSP2                                       | 56              | 1               | DNA          | NA                 |
| Virus | Cyanophage Pf-WMP4                                      | 45              | 1               | DNA          | 4                  |
| Virus | Cyanophage PSS2                                         | 131             | 1               | DNA          | 4                  |
| Virus | Cyanophage Syn5                                         | 61              | 1               | DNA          | 4                  |
| Virus | Cycad leaf necrosis virus                               | 3               | 7               | DNA          | 2                  |
| Virus | Cycas necrotic stunt virus                              | 9               | 4               | RNA          | 1                  |
| Virus | Cyclovirus bat/USA/2009                                 | 2               | 2               | DNA          | NA                 |
| Virus | Cyclovirus NGchicken15/NGA/2009                         | 2               | 2               | DNA          | 3                  |
| Virus | Cyclovirus PKgoat11/PAK/2009                            | 2               | 2               | DNA          | 3                  |
| Virus | Cyclovirus PKgoat21/PAK/2009                            | 2               | 2               | DNA          | 3                  |
| Virus | Cydia pomonella granulovirus                            | 143             | 1               | DNA          | NA                 |
| Virus | Cymbidium mosaic virus                                  | 5               | 4               | RNA          | 1                  |
| Virus | Cymbidium ringspot virus                                | 5               | 4               | RNA          | 1                  |
| Virus | Cymbidium ringspot virus satellite RNA                  | 1               | NA              | RNA          | NA                 |
| Virus | Cynomolgus macaque cytomegalovirus strain Ottawa        | 274             | 1               | DNA          | NA                 |
| Virus | Cypovirus 1                                             | 10              | 3               | RNA          | NA                 |
| Virus | Cypovirus 14                                            | 11              | 3               | RNA          | NA                 |
| Virus | Cypovirus 5                                             | 6               | 3               | RNA          | NA                 |
| Virus | Cyprinid herpesvirus 3                                  | 163             | 1               | DNA          | NA                 |
| Virus | Dahlia mosaic virus                                     | 8               | 7               | DNA          | 2                  |
| Virus | Dalechampia chlorotic mosaic virus                      | 7               | 2               | DNA          | 3                  |
| Virus | Daphne mosaic virus                                     | 12              | 4               | RNA          | 1                  |



| Type  | Name                                         | Number of genes | Baltimore class | Nucleic Acid | Monophyletic group |
|-------|----------------------------------------------|-----------------|-----------------|--------------|--------------------|
| Virus | Daphne virus S                               | 6               | 4               | RNA          | 1                  |
| Virus | Dasheen mosaic virus                         | 12              | 4               | RNA          | 1                  |
| Virus | Datura leaf distortion virus                 | 7               | 2               | DNA          | 3                  |
| Virus | Deerpox virus W-1170-84                      | 170             | 1               | DNA          | 5                  |
| Virus | Deerpox virus W-848-83                       | 169             | 1               | DNA          | 5                  |
| Virus | Deformed wing virus                          | 1               | 4               | RNA          | 1                  |
| Virus | Deftia phage phiW-14                         | 236             | 1               | DNA          | 4                  |
| Virus | Deltapapillomavirus 1                        | 15              | 1               | DNA          | 3                  |
| Virus | Deltapapillomavirus 2                        | 9               | 1               | DNA          | 3                  |
| Virus | Dendrolimus punctatus densovirus             | 3               | 2               | DNA          | 3                  |
| Virus | Dendrolimus punctatus tetravirus             | 3               | 4               | RNA          | 1                  |
| Virus | Dengue virus 1                               | 14              | 4               | RNA          | 1                  |
| Virus | Dengue virus 2                               | 14              | 4               | RNA          | 1                  |
| Virus | Dengue virus 3                               | 14              | 4               | RNA          | 1                  |
| Virus | Dengue virus 4                               | 14              | 4               | RNA          | 1                  |
| Virus | Desmodium leaf distortion virus              | 6               | 2               | DNA          | 3                  |
| Virus | Diaporthe ambigua RNA virus 1                | 2               | 4               | RNA          | NA                 |
| Virus | Diascia yellow mottle virus                  | 3               | 4               | RNA          | 1                  |
| Virus | Diatraea saccharalis densovirus              | 7               | 2               | DNA          | 3                  |
| Virus | Dicliptera yellow mottle virus               | 6               | 2               | DNA          | 3                  |
| Virus | Digitaria ciliaris striate mosaic virus      | 4               | 2               | DNA          | 3                  |
| Virus | Digitaria didactyla striate mosaic virus     | 4               | 2               | DNA          | 3                  |
| Virus | Digitaria streak virus                       | 4               | 2               | DNA          | 3                  |
| Virus | Dioscorea bacilliform virus                  | 3               | 7               | DNA          | 2                  |
| Virus | Diplodia scrobiculata RNA virus 1            | 2               | 3               | RNA          | NA                 |
| Virus | Discula destructiva virus 1                  | 2               | 3               | RNA          | 1                  |
| Virus | Discula destructiva virus 2                  | 2               | 3               | RNA          | 1                  |
| Virus | Diuris virus A                               | 7               | 4               | RNA          | 1                  |
| Virus | Diuris virus B                               | 7               | 4               | RNA          | NA                 |
| Virus | Dobrava-Belgrade virus                       | 3               | 5               | RNA          | NA                 |
| Virus | Dolichos yellow mosaic virus                 | 6               | 2               | DNA          | 3                  |
| Virus | Dolphin morbillivirus                        | 7               | 5               | RNA          | NA                 |
| Virus | Donggang virus                               | 1               | 4               | RNA          | 1                  |
| Virus | Dracaena mottle virus                        | 7               | 7               | DNA          | 2                  |
| Virus | Dragonfly-associated microphage 1            | 5               | 2               | DNA          | NA                 |
| Virus | Drosophila A virus                           | 2               | 3               | RNA          | NA                 |
| Virus | Drosophila C virus                           | 2               | 4               | RNA          | 1                  |
| Virus | Drosophila melanogaster sigma virus AP30     | 6               | 5               | RNA          | NA                 |
| Virus | Drosophila melanogaster totivirus SW-2009a   | 2               | 3               | RNA          | NA                 |
| Virus | Drosophila x virus                           | 2               | 3               | RNA          | NA                 |
| Virus | Duck adenovirus A                            | 60              | 1               | DNA          | NA                 |
| Virus | Duck astrovirus C-NGB                        | 3               | 4               | RNA          | 1                  |
| Virus | Duck circovirus                              | 4               | 2               | DNA          | 3                  |
| Virus | Duck egg-drop syndrome virus                 | 1               | 4               | RNA          | 1                  |
| Virus | Duck flavivirus TA                           | 1               | 4               | RNA          | 1                  |
| Virus | Duck hepatitis A virus 1                     | 1               | 4               | RNA          | 1                  |
| Virus | Duck hepatitis A virus 3                     | 1               | 4               | RNA          | 1                  |
| Virus | Duck hepatitis B virus                       | 7               | 7               | DNA          | 2                  |
| Virus | Dugbe virus                                  | 4               | 5               | RNA          | NA                 |
| Virus | Dulcamara mottle virus                       | 3               | 4               | RNA          | 1                  |
| Virus | East African cassava mosaic Cameroon virus   | 8               | 2               | DNA          | 3                  |
| Virus | East African cassava mosaic Kenya virus      | 8               | 2               | DNA          | 3                  |
| Virus | East African cassava mosaic virus            | 9               | 2               | DNA          | 3                  |
| Virus | East African cassava mosaic Zanzibar virus   | 8               | 2               | DNA          | 3                  |
| Virus | East Asian Passiflora virus                  | 12              | 4               | RNA          | 1                  |
| Virus | Eastern equine encephalitis virus            | 19              | 4               | RNA          | 1                  |
| Virus | Ebola virus - Mayinga                        | Zaire           | 1976            |              | RNA                |
| Virus | Ectocarpus siliculosus virus 1               | 240             | 1               | DNA          | 5                  |
| Virus | Ectromelia virus                             | 173             | 1               | DNA          | 5                  |
| Virus | Ectropis obliqua NPV                         | 126             | 1               | DNA          | NA                 |
| Virus | Ectropis obliqua picorna-like virus          | 1               | 4               | RNA          | 1                  |
| Virus | Edwardsiella phage KF-1                      | 48              | 1               | DNA          | 4                  |
| Virus | Eggplant mosaic virus                        | 3               | 4               | RNA          | 1                  |
| Virus | Eidolon helvum parvovirus 1                  | 4               | 2               | DNA          | 3                  |
| Virus | Eimeria brunetti RNA virus 1                 | 2               | 3               | RNA          | NA                 |
| Virus | Eliat virus                                  | 3               | 4               | RNA          | 1                  |
| Virus | Elm mottle virus                             | 5               | 4               | RNA          | 1                  |
| Virus | Emilia yellow vein virus-associated DNA beta | 1               | 2               | DNA          | NA                 |
| Virus | Emiliania huxleyi virus 86                   | 597             | 1               | DNA          | 5                  |
| Virus | Encephalomyocarditis virus                   | 13              | 4               | RNA          | 1                  |
| Virus | Entebbe bat virus                            | 1               | 4               | RNA          | 1                  |
| Virus | Enterobacter phage IME11                     | 91              | 1               | DNA          | 4                  |
| Virus | Enterobacteria phage 13a                     | 55              | 1               | DNA          | 4                  |
| Virus | Enterobacteria phage 285P                    | 47              | 1               | DNA          | 4                  |
| Virus | Enterobacteria phage 933W                    | 80              | 1               | DNA          | 4                  |
| Virus | Enterobacteria phage alpha3                  | 10              | 2               | DNA          | NA                 |
| Virus | Enterobacteria phage BA14                    | 52              | 1               | DNA          | 4                  |
| Virus | Enterobacteria phage BZ13                    | 4               | 4               | RNA          | 1                  |
| Virus | Enterobacteria phage CC31                    | 279             | 1               | DNA          | 4                  |
| Virus | Enterobacteria phage EcoDS1                  | 53              | 1               | DNA          | 4                  |

| Type  | Name                                    | Number of genes | Baltimore class | Nucleic Acid | Monophyletic group |
|-------|-----------------------------------------|-----------------|-----------------|--------------|--------------------|
| Virus | Enterobacteria phage EPS7               | 170             | 1               | DNA          | 4                  |
| Virus | Enterobacteria phage epsilon15          | 51              | 1               | DNA          | NA                 |
| Virus | Enterobacteria phage ES18               | 79              | 1               | DNA          | 4                  |
| Virus | Enterobacteria phage FI sensu lato      | 4               | 4               | RNA          | 1                  |
| Virus | Enterobacteria phage G4 sensu lato      | 11              | 2               | DNA          | NA                 |
| Virus | Enterobacteria phage HK022              | 57              | 1               | DNA          | 4                  |
| Virus | Enterobacteria phage HK620              | 58              | 1               | DNA          | NA                 |
| Virus | Enterobacteria phage HK97               | 61              | 1               | DNA          | 4                  |
| Virus | Enterobacteria phage HX01               | 62              | 1               | DNA          | 4                  |
| Virus | Enterobacteria phage I2-2               | 9               | 2               | DNA          | NA                 |
| Virus | Enterobacteria phage ID18 sensu lato    | 11              | 2               | DNA          | NA                 |
| Virus | Enterobacteria phage ID2 Moscow/ID/2001 | 11              | 2               | DNA          | NA                 |
| Virus | Enterobacteria phage If1                | 10              | 2               | DNA          | NA                 |
| Virus | Enterobacteria phage Ike                | 12              | 2               | DNA          | NA                 |
| Virus | Enterobacteria phage IME08              | 253             | 1               | DNA          | 4                  |
| Virus | Enterobacteria phage JK06               | 82              | 1               | DNA          | 4                  |
| Virus | Enterobacteria phage JL1                | 56              | 1               | DNA          | 4                  |
| Virus | Enterobacteria phage JS10               | 265             | 1               | DNA          | 4                  |
| Virus | Enterobacteria phage JS98               | 266             | 1               | DNA          | 4                  |
| Virus | Enterobacteria phage JSE                | 277             | 1               | DNA          | 4                  |
| Virus | Enterobacteria phage K1-5               | 52              | 1               | DNA          | 4                  |
| Virus | Enterobacteria phage K1E                | 62              | 1               | DNA          | 4                  |
| Virus | Enterobacteria phage K1F                | 43              | 1               | DNA          | 4                  |
| Virus | Enterobacteria phage K30                | 49              | 1               | DNA          | 4                  |
| Virus | Enterobacteria phage lambda             | 74              | 1               | DNA          | 4                  |
| Virus | Enterobacteria phage LKA1               | 56              | 1               | DNA          | 4                  |
| Virus | Enterobacteria phage M13                | 10              | 2               | DNA          | NA                 |
| Virus | Enterobacteria phage Min27              | 83              | 1               | DNA          | 4                  |
| Virus | Enterobacteria phage MS2                | 4               | 4               | RNA          | 1                  |
| Virus | Enterobacteria phage Mu                 | 55              | 1               | DNA          | 4                  |
| Virus | Enterobacteria phage N15                | 60              | 1               | DNA          | 4                  |
| Virus | Enterobacteria phage NJ01               | 109             | 1               | DNA          | 4                  |
| Virus | Enterobacteria phage P1                 | 110             | 1               | DNA          | 4                  |
| Virus | Enterobacteria phage P2                 | 43              | 1               | DNA          | 4                  |
| Virus | Enterobacteria phage P22                | 72              | 1               | DNA          | 4                  |
| Virus | Enterobacteria phage P4                 | 14              | 1               | DNA          | 4                  |
| Virus | Enterobacteria phage Phi1               | 276             | 1               | DNA          | 4                  |
| Virus | Enterobacteria phage phiEco32           | 128             | 1               | DNA          | 4                  |
| Virus | Enterobacteria phage phiEcoM-GJ1        | 75              | 1               | DNA          | 4                  |
| Virus | Enterobacteria phage phiP27             | 58              | 1               | DNA          | 4                  |
| Virus | Enterobacteria phage phiX174 sensu lato | 11              | 2               | DNA          | NA                 |
| Virus | Enterobacteria phage PRD1               | 31              | 1               | DNA          | NA                 |
| Virus | Enterobacteria phage PsP3               | 42              | 1               | DNA          | 4                  |
| Virus | Enterobacteria phage Qbeta              | 4               | 4               | RNA          | 1                  |
| Virus | Enterobacteria phage RB14               | 274             | 1               | DNA          | 4                  |
| Virus | Enterobacteria phage RB16               | 270             | 1               | DNA          | 4                  |
| Virus | Enterobacteria phage RB32               | 270             | 1               | DNA          | 4                  |
| Virus | Enterobacteria phage RB43               | 292             | 1               | DNA          | 4                  |
| Virus | Enterobacteria phage RB49               | 279             | 1               | DNA          | 4                  |
| Virus | Enterobacteria phage RB51               | 273             | 1               | DNA          | 4                  |
| Virus | Enterobacteria phage RB69               | 273             | 1               | DNA          | 4                  |
| Virus | Enterobacteria phage RTP                | 75              | 1               | DNA          | 4                  |
| Virus | Enterobacteria phage Sf6                | 66              | 1               | DNA          | NA                 |
| Virus | Enterobacteria phage SfV                | 53              | 1               | DNA          | 4                  |
| Virus | Enterobacteria phage SP6                | 52              | 1               | DNA          | 4                  |
| Virus | Enterobacteria phage SPC35              | 145             | 1               | DNA          | 4                  |
| Virus | Enterobacteria phage SSL-2009a          | 52              | 1               | DNA          | 4                  |
| Virus | Enterobacteria phage St-1               | 11              | 2               | DNA          | NA                 |
| Virus | Enterobacteria phage ST104              | 63              | 1               | DNA          | 4                  |
| Virus | Enterobacteria phage ST64T              | 65              | 1               | DNA          | NA                 |
| Virus | Enterobacteria phage T1                 | 78              | 1               | DNA          | 4                  |
| Virus | Enterobacteria phage T3                 | 55              | 1               | DNA          | 4                  |
| Virus | Enterobacteria phage T4                 | 278             | 1               | DNA          | 4                  |
| Virus | Enterobacteria phage T5                 | 163             | 1               | DNA          | 4                  |
| Virus | Enterobacteria phage T7                 | 60              | 1               | DNA          | 4                  |
| Virus | Enterobacteria phage TLS                | 87              | 1               | DNA          | 4                  |
| Virus | Enterobacteria phage vB_EcoM_ACG-C40    | 282             | 1               | DNA          | 4                  |
| Virus | Enterobacteria phage vB_EcoM-VR7        | 293             | 1               | DNA          | 4                  |
| Virus | Enterobacteria phage vB_EcoP_ACG-C91    | 56              | 1               | DNA          | 4                  |
| Virus | Enterobacteria phage vB_EcoS_ACG-M12    | 78              | 1               | DNA          | 4                  |
| Virus | Enterobacteria phage VT2-Sakai          | 83              | 1               | DNA          | 4                  |
| Virus | Enterobacteria phage WA13 sensu lato    | 10              | 2               | DNA          | NA                 |
| Virus | Enterobacteria phage YYZ-2008           | 75              | NA              | NA           | NA                 |
| Virus | Enterococcus phage BC-611               | 57              | 1               | DNA          | 4                  |
| Virus | Enterococcus phage EF62phi              | 48              | NA              | NA           | NA                 |
| Virus | Enterococcus phage EFAP-1               | 24              | 1               | DNA          | 4                  |
| Virus | Enterococcus phage EFRM31               | 23              | 1               | DNA          | 4                  |
| Virus | Enterococcus phage phiEf11              | 65              | 1               | DNA          | 4                  |
| Virus | Enterococcus phage phiEF24C             | 221             | 1               | DNA          | 4                  |
| Virus | Enterococcus phage phiFL1A              | 61              | 1               | DNA          | 4                  |

| Type  | Name                                                                 | Number of genes | Baltimore class | Nucleic Acid | Monophyletic group |
|-------|----------------------------------------------------------------------|-----------------|-----------------|--------------|--------------------|
| Virus | Enterococcus phage phiFL2A                                           | 63              | 1               | DNA          | 4                  |
| Virus | Enterococcus phage phiFL3A                                           | 64              | 1               | DNA          | 4                  |
| Virus | Enterococcus phage phiFL4A                                           | 55              | 1               | DNA          | 4                  |
| Virus | Enzootic nasal tumour virus of goats                                 | 4               | 6               | RNA          | 2                  |
| Virus | Epinephelus tauvina nervous necrosis virus                           | 3               | 4               | RNA          | 1                  |
| Virus | Epinotia aporema granulovirus                                        | 132             | 1               | DNA          | NA                 |
| Virus | Epiphyas postvittana NPV                                             | 136             | 1               | DNA          | NA                 |
| Virus | Epirus cherry virus                                                  | 3               | 4               | RNA          | 1                  |
| Virus | Epizootic hemorrhagic disease virus (serotype 1 / strain New Jersey) | 11              | 3               | RNA          | NA                 |
| Virus | Equid herpesvirus 1                                                  | 80              | 1               | DNA          | NA                 |
| Virus | Equid herpesvirus 2                                                  | 79              | 1               | DNA          | NA                 |
| Virus | Equid herpesvirus 4                                                  | 79              | 1               | DNA          | NA                 |
| Virus | Equid herpesvirus 8                                                  | 81              | 1               | DNA          | NA                 |
| Virus | Equid herpesvirus 9                                                  | 80              | 1               | DNA          | NA                 |
| Virus | Equine arteritis virus                                               | 22              | 4               | RNA          | NA                 |
| Virus | Equine coronavirus                                                   | 11              | 4               | RNA          | NA                 |
| Virus | equine foamy virus                                                   | 5               | 6               | RNA          | 2                  |
| Virus | Equine infectious anemia virus                                       | 4               | 6               | RNA          | 2                  |
| Virus | Equine papillomavirus 2                                              | 6               | 1               | DNA          | 3                  |
| Virus | Equine papillomavirus 3                                              | 7               | 1               | DNA          | 3                  |
| Virus | Equine polyomavirus                                                  | 5               | 1               | DNA          | 3                  |
| Virus | Equine rhinitis A virus                                              | 14              | 4               | RNA          | 1                  |
| Virus | Equine rhinitis B virus 1                                            | 13              | 4               | RNA          | 1                  |
| Virus | Equine rhinitis B virus 2                                            | 13              | 4               | RNA          | 1                  |
| Virus | Equinus papillomavirus                                               | 6               | 1               | DNA          | 3                  |
| Virus | Equus caballus papillomavirus 1                                      | 7               | 1               | DNA          | 3                  |
| Virus | Eragrostis curvula streak virus                                      | 3               | 2               | DNA          | 3                  |
| Virus | Eragrostis minor streak virus                                        | 4               | 2               | DNA          | 3                  |
| Virus | Eragrostis streak virus                                              | 3               | 2               | DNA          | 3                  |
| Virus | Erectites yellow mosaic virus                                        | 6               | 2               | DNA          | 3                  |
| Virus | Erectites yellow mosaic virus satellite DNA beta                     | 1               | 2               | DNA          | 3                  |
| Virus | Erethizon dorsatum papillomavirus 1                                  | 7               | 1               | DNA          | 3                  |
| Virus | Erinaceus europaeus papillomavirus                                   | 7               | 1               | DNA          | 3                  |
| Virus | Erwinia amylovora phage Era103                                       | 53              | 1               | DNA          | 4                  |
| Virus | Erwinia phage PEP14                                                  | 64              | 1               | DNA          | 4                  |
| Virus | Erwinia phage phiEa104                                               | 118             | 1               | DNA          | 4                  |
| Virus | Erwinia phage phiEa21-4                                              | 118             | 1               | DNA          | 4                  |
| Virus | Erwinia phage phiEt88                                                | 68              | 1               | DNA          | 4                  |
| Virus | Erysimum latent virus                                                | 3               | 4               | RNA          | 1                  |
| Virus | Escherichia phage bV_EcoS_AKFV33                                     | 160             | 1               | DNA          | 4                  |
| Virus | Escherichia phage D108                                               | 57              | 1               | DNA          | 4                  |
| Virus | Escherichia phage HK639                                              | 76              | 1               | DNA          | 4                  |
| Virus | Escherichia phage HK75                                               | 58              | 1               | DNA          | 4                  |
| Virus | Escherichia phage KBNP135                                            | 120             | NA              | NA           | NA                 |
| Virus | Escherichia phage KBNP21                                             | 82              | 1               | DNA          | 4                  |
| Virus | Escherichia phage N4                                                 | 72              | 1               | DNA          | 4                  |
| Virus | Escherichia phage P13374                                             | 79              | 1               | DNA          | 4                  |
| Virus | Escherichia phage phiV10                                             | 55              | 1               | DNA          | 4                  |
| Virus | Escherichia phage rv5                                                | 233             | 1               | DNA          | 4                  |
| Virus | Escherichia phage vB_EcoM_CBA120                                     | 204             | 1               | DNA          | 4                  |
| Virus | Escherichia phage vB_EcoP_G7C                                        | 79              | 1               | DNA          | 4                  |
| Virus | Escherichia phage wV8                                                | 140             | 1               | DNA          | 4                  |
| Virus | Espirito Santo virus                                                 | 6               | 3               | RNA          | NA                 |
| Virus | Etapapillomavirus 1                                                  | 6               | 1               | DNA          | 3                  |
| Virus | Eupatorium vein clearing virus                                       | 6               | 7               | DNA          | 2                  |
| Virus | Eupatorium yellow vein betasatellite                                 | 1               | 2               | DNA          | 3                  |
| Virus | Eupatorium yellow vein virus                                         | 6               | 2               | DNA          | 3                  |
| Virus | Euphorbia leaf curl virus                                            | 6               | 2               | DNA          | 3                  |
| Virus | Euphorbia mosaic virus                                               | 6               | 2               | DNA          | 3                  |
| Virus | Euphorbia mosaic virus associated DNA 1                              | 1               | NA              | NA           | NA                 |
| Virus | Euphorbia yellow mosaic virus                                        | 6               | 2               | DNA          | 3                  |
| Virus | Euproctis pseudoconsersa nucleopolyhedrovirus                        | 139             | 1               | DNA          | NA                 |
| Virus | Euprosterna elaeasa virus                                            | 5               | 4               | RNA          | 1                  |
| Virus | European bat lyssavirus 1                                            | 5               | 5               | RNA          | NA                 |
| Virus | European bat lyssavirus 2                                            | 5               | 5               | RNA          | NA                 |
| Virus | European brown hare syndrome virus                                   | 9               | 4               | RNA          | 1                  |
| Virus | European catfish virus                                               | 136             | 1               | DNA          | 5                  |
| Virus | European mountain ash ringspot-associated virus                      | 4               | 4               | RNA          | 1                  |
| Virus | Eyach virus                                                          | 13              | 3               | RNA          | NA                 |
| Virus | Faba bean necrotic stunt virus                                       | 8               | 2               | DNA          | NA                 |
| Virus | Faba bean necrotic yellows virus                                     | 10              | 2               | DNA          | NA                 |
| Virus | Feldmannia species virus                                             | 150             | 1               | DNA          | 5                  |
| Virus | Felid herpesvirus 1                                                  | 77              | 1               | DNA          | NA                 |
| Virus | Feline bocavirus                                                     | 4               | 2               | DNA          | 3                  |
| Virus | Feline calicivirus                                                   | 13              | 4               | RNA          | 1                  |
| Virus | Feline foamy virus                                                   | 4               | 6               | RNA          | 2                  |
| Virus | Feline immunodeficiency virus                                        | 7               | 6               | RNA          | 2                  |
| Virus | Feline infectious peritonitis virus                                  | 9               | 4               | RNA          | NA                 |
| Virus | Feline leukemia virus                                                | 13              | 6               | RNA          | 2                  |
| Virus | Feline picornavirus                                                  | 13              | 4               | RNA          | 1                  |

| Type  | Name                                                 | Number of genes | Baltimore class | Nucleic Acid | Monophyletic group |
|-------|------------------------------------------------------|-----------------|-----------------|--------------|--------------------|
| Virus | Felis domesticus papillomavirus type 1               | 7               | 1               | DNA          | 3                  |
| Virus | Fenneropenaeus chinensis hepatopancreatic densovirus | 3               | 2               | DNA          | 3                  |
| Virus | Fer-de-lance virus                                   | 8               | 5               | RNA          | NA                 |
| Virus | Fig badnavirus 1                                     | 3               | 7               | DNA          | 2                  |
| Virus | Fig cryptic virus                                    | 2               | 3               | RNA          | 1                  |
| Virus | Fig fleck-associated virus                           | 7               | 4               | RNA          | 1                  |
| Virus | Figwort mosaic virus                                 | 7               | 7               | DNA          | 2                  |
| Virus | Fiji disease virus                                   | 12              | 3               | RNA          | NA                 |
| Virus | Finch circovirus                                     | 3               | 2               | DNA          | 3                  |
| Virus | Finch polyomavirus                                   | 6               | 1               | DNA          | 3                  |
| Virus | Flavobacterium phage 11b                             | 65              | 1               | DNA          | 4                  |
| Virus | Flexal virus                                         | 4               | 5               | RNA          | NA                 |
| Virus | Flock house virus                                    | 4               | 4               | RNA          | 1                  |
| Virus | Foot-and-mouth disease virus - type A                | 1               | 4               | RNA          | 1                  |
| Virus | Foot-and-mouth disease virus - type Asia 1           | 8               | 4               | RNA          | 1                  |
| Virus | Foot-and-mouth disease virus - type C                | 15              | 4               | RNA          | 1                  |
| Virus | Foot-and-mouth disease virus - type O                | 13              | 4               | RNA          | 1                  |
| Virus | Foot-and-mouth disease virus - type SAT 1            | 1               | 4               | RNA          | 1                  |
| Virus | Foot-and-mouth disease virus - type SAT 2            | 1               | 4               | RNA          | 1                  |
| Virus | Foot-and-mouth disease virus - type SAT 3            | 1               | 4               | RNA          | 1                  |
| Virus | Fort Morgan virus                                    | 13              | 4               | RNA          | 1                  |
| Virus | Fowl adenovirus A                                    | 77              | 1               | DNA          | NA                 |
| Virus | Fowl adenovirus C                                    | 46              | 1               | DNA          | NA                 |
| Virus | Fowl adenovirus D                                    | 63              | 1               | DNA          | NA                 |
| Virus | Fowl adenovirus E                                    | 46              | 1               | DNA          | NA                 |
| Virus | Fowlpox virus                                        | 261             | 1               | DNA          | 5                  |
| Virus | Foxtail mosaic virus                                 | 5               | 4               | RNA          | 1                  |
| Virus | Fragaria chiloensis cryptic virus                    | 3               | 3               | RNA          | 1                  |
| Virus | Fragaria chiloensis latent virus                     | 6               | 4               | RNA          | 1                  |
| Virus | Francolinus leucoscepus papillomavirus 1             | 8               | 1               | DNA          | 3                  |
| Virus | Frangipani mosaic virus                              | 4               | 4               | RNA          | 1                  |
| Virus | Freesia mosaic virus                                 | 12              | 4               | RNA          | 1                  |
| Virus | French bean leaf curl betasatellite-Kanpur           | 1               | NA              | NA           | NA                 |
| Virus | French bean leaf curl virus-Kanpur                   | 7               | 2               | DNA          | 3                  |
| Virus | French bean severe leaf curl virus                   | 2               | 2               | DNA          | 3                  |
| Virus | Friend murine leukemia virus                         | 10              | 6               | RNA          | 2                  |
| Virus | Fritillary virus Y                                   | 12              | 4               | RNA          | 1                  |
| Virus | Frog adenovirus 1                                    | 23              | 1               | DNA          | NA                 |
| Virus | Frog virus 3                                         | 99              | 1               | DNA          | 5                  |
| Virus | Fujinami sarcoma virus                               | 5               | 6               | RNA          | 2                  |
| Virus | Fusarium graminearum dsRNA mycovirus-1               | 4               | 3               | RNA          | NA                 |
| Virus | Fusarium graminearum dsRNA mycovirus-3               | 2               | 3               | RNA          | NA                 |
| Virus | Fusarium graminearum dsRNA mycovirus-4               | 3               | 3               | RNA          | NA                 |
| Virus | Fusarium poae virus 1                                | 2               | 3               | RNA          | 1                  |
| Virus | Galinsoga mosaic virus                               | 5               | 4               | RNA          | 1                  |
| Virus | Galleria mellonella densovirus                       | 7               | 2               | DNA          | 3                  |
| Virus | Gallid herpesvirus 1                                 | 79              | 1               | DNA          | NA                 |
| Virus | Gallid herpesvirus 2                                 | 85              | 1               | DNA          | NA                 |
| Virus | Gallid herpesvirus 3                                 | 76              | 1               | DNA          | NA                 |
| Virus | Gammapapillomavirus HPV127                           | 7               | 1               | DNA          | 3                  |
| Virus | Garlic common latent virus                           | 6               | 4               | RNA          | 1                  |
| Virus | Garlic latent virus                                  | 6               | 4               | RNA          | 1                  |
| Virus | Garlic virus A                                       | 6               | 4               | RNA          | 1                  |
| Virus | Garlic virus C                                       | 6               | 4               | RNA          | 1                  |
| Virus | Garlic virus E                                       | 8               | 4               | RNA          | 1                  |
| Virus | Garlic virus X                                       | 6               | 4               | RNA          | 1                  |
| Virus | Gayfeather mild mottle virus                         | 5               | 4               | RNA          | 1                  |
| Virus | GB virus A                                           | 9               | 4               | RNA          | 1                  |
| Virus | GB virus C                                           | 9               | 4               | RNA          | 1                  |
| Virus | Geobacillus phage GBSV1                              | 54              | 1               | DNA          | NA                 |
| Virus | Geobacillus virus E2                                 | 71              | 1               | DNA          | NA                 |
| Virus | Getah virus                                          | 4               | 4               | RNA          | 1                  |
| Virus | Giardia lamblia virus                                | 2               | 3               | RNA          | NA                 |
| Virus | Gibbon ape leukemia virus                            | 12              | 6               | RNA          | 2                  |
| Virus | Gill-associated virus                                | 5               | 4               | RNA          | NA                 |
| Virus | Glossina pallidipes salivary gland hypertrophy virus | 160             | 1               | DNA          | NA                 |
| Virus | Glypta fumiferanae ichnovirus                        | 103             | 1               | DNA          | NA                 |
| Virus | Goatpox virus Pellor                                 | 150             | 1               | DNA          | 5                  |
| Virus | Golden Gate virus                                    | 4               | 5               | RNA          | NA                 |
| Virus | Goose adenovirus 4                                   | 34              | 1               | DNA          | NA                 |
| Virus | Goose circovirus                                     | 4               | 2               | DNA          | 3                  |
| Virus | Goose hemorrhagic polyomavirus                       | 6               | 1               | DNA          | 3                  |
| Virus | Goose paramyxovirus SF02                             | 6               | 5               | RNA          | NA                 |
| Virus | Goose parvovirus                                     | 4               | 2               | DNA          | 3                  |
| Virus | Gooseberry vein banding virus                        | 3               | 7               | DNA          | 2                  |
| Virus | Gordonia phage GRU1                                  | 94              | 1               | DNA          | 4                  |
| Virus | Gordonia phage GTE2                                  | 57              | 1               | DNA          | 4                  |
| Virus | Gordonia phage GTE5                                  | 92              | 1               | DNA          | 4                  |
| Virus | Gordonia phage GTE7                                  | 103             | 1               | DNA          | 4                  |
| Virus | Gossypium darwinii symptomless alphasatellite        | 1               | 2               | DNA          | NA                 |

| Type  | Name                                                           | Number of genes | Baltimore class | Nucleic Acid | Monophyletic group |
|-------|----------------------------------------------------------------|-----------------|-----------------|--------------|--------------------|
| Virus | Gossypium darwinii symptomless virus                           | 6               | 2               | DNA          | 3                  |
| Virus | Gossypium davidsonii symptomless alphasatellite                | 1               | 2               | DNA          | NA                 |
| Virus | Gossypium mustelinum symptomless alphasatellite                | 1               | 2               | DNA          | NA                 |
| Virus | Gossypium punctatum mild leaf curl virus                       | 8               | 2               | DNA          | 3                  |
| Virus | Grapevine Algerian latent virus                                | 5               | 4               | RNA          | 1                  |
| Virus | Grapevine Anatolian ringspot virus                             | 2               | 4               | RNA          | 1                  |
| Virus | Grapevine berry inner necrosis virus                           | 3               | 4               | RNA          | 1                  |
| Virus | Grapevine Bulgarian latent virus                               | 10              | 4               | RNA          | 1                  |
| Virus | grapevine chrome mosaic virus                                  | 2               | 4               | RNA          | 1                  |
| Virus | Grapevine chrome mosaic virus                                  | 7               | 4               | RNA          | 1                  |
| Virus | Grapevine deformation virus                                    | 7               | 4               | RNA          | 1                  |
| Virus | Grapevine fanleaf virus                                        | 10              | 4               | RNA          | 1                  |
| Virus | Grapevine fanleaf virus satellite RNA                          | 1               | NA              | RNA          | NA                 |
| Virus | Grapevine fleck virus                                          | 4               | 4               | RNA          | 1                  |
| Virus | Grapevine geminivirus                                          | 1               | 2               | DNA          | 3                  |
| Virus | Grapevine leafroll-associated virus 1                          | 10              | 4               | RNA          | 1                  |
| Virus | Grapevine leafroll-associated virus 10                         | 7               | 4               | RNA          | 1                  |
| Virus | Grapevine leafroll-associated virus 12                         | 10              | 4               | RNA          | 1                  |
| Virus | Grapevine leafroll-associated virus 2                          | 9               | 4               | RNA          | 1                  |
| Virus | Grapevine leafroll-associated virus 3                          | 12              | 4               | RNA          | 1                  |
| Virus | Grapevine leafroll-associated virus 4                          | 6               | 4               | RNA          | 1                  |
| Virus | Grapevine leafroll-associated virus 5                          | 7               | 4               | RNA          | 1                  |
| Virus | Grapevine leafroll-associated virus 6                          | 6               | 4               | RNA          | 1                  |
| Virus | Grapevine leafroll-associated virus 7                          | 10              | 4               | RNA          | 1                  |
| Virus | Grapevine Pinot gris virus                                     | 3               | 4               | RNA          | 1                  |
| Virus | Grapevine rootstock stem lesion associated virus               | 11              | 4               | RNA          | 1                  |
| Virus | Grapevine Syrah virus 1                                        | 5               | 4               | RNA          | 1                  |
| Virus | Grapevine vein-clearing virus                                  | 4               | NA              | DNA          | 2                  |
| Virus | Grapevine virus A                                              | 5               | 4               | RNA          | 1                  |
| Virus | Grapevine virus B                                              | 5               | 4               | RNA          | 1                  |
| Virus | Grapevine virus E                                              | 5               | 4               | RNA          | 1                  |
| Virus | Grapevine virus F                                              | 5               | 4               | RNA          | NA                 |
| Virus | Great Island virus                                             | 11              | 3               | RNA          | NA                 |
| Virus | Gremmeniella abietina mitochondrial RNA virus S2               | 1               | 4               | RNA          | 1                  |
| Virus | Gremmeniella abietina RNA virus L1                             | 2               | 3               | RNA          | NA                 |
| Virus | Gremmeniella abietina RNA virus L2                             | 2               | 3               | RNA          | NA                 |
| Virus | Gremmeniella abietina RNA virus MS1                            | 3               | 3               | RNA          | 1                  |
| Virus | Gremmeniella abietina RNA virus MS2                            | 3               | 3               | RNA          | 1                  |
| Virus | Gremmeniella abietina type B RNA virus XL1                     | 1               | 3               | RNA          | NA                 |
| Virus | Ground squirrel hepatitis virus                                | 5               | 7               | DNA          | 2                  |
| Virus | Groundnut bud necrosis virus                                   | 5               | 5               | RNA          | NA                 |
| Virus | Groundnut ringspot and Tomato chlorotic spot virus reassortant | 5               | 5               | RNA          | NA                 |
| Virus | Groundnut rosette virus                                        | 4               | 4               | RNA          | 1                  |
| Virus | Gryllus bimaculatus nudivirus                                  | 98              | 1               | DNA          | NA                 |
| Virus | Guanarito virus                                                | 4               | 5               | RNA          | NA                 |
| Virus | Gull circovirus                                                | 3               | 2               | DNA          | 3                  |
| Virus | Gyrovirus 4                                                    | 2               | 2               | DNA          | 3                  |
| Virus | Gyrovirus GyV3                                                 | 3               | 2               | DNA          | 3                  |
| Virus | Haemophilus phage Aaphi23                                      | 66              | 1               | DNA          | 4                  |
| Virus | Haemophilus phage HP1                                          | 42              | 1               | DNA          | 4                  |
| Virus | Haemophilus phage HP2                                          | 37              | 1               | DNA          | 4                  |
| Virus | Halastavi arva RNA virus                                       | 2               | 4               | RNA          | NA                 |
| Virus | Haloarcula hispanica pleomorphic virus 1                       | 9               | 1               | DNA          | NA                 |
| Virus | Haloarcula phage SH1                                           | 56              | 1               | DNA          | NA                 |
| Virus | Halocynthia phage JM-2012                                      | 173             | 1               | DNA          | 4                  |
| Virus | Halogeometricum pleomorphic virus 1                            | 16              | 2               | DNA          | NA                 |
| Virus | Halomonas phage phiHAP-1                                       | 46              | 1               | DNA          | 4                  |
| Virus | Halorubrum phage HF2                                           | 114             | 1               | DNA          | NA                 |
| Virus | Halorubrum pleomorphic virus 1                                 | 10              | 2               | DNA          | NA                 |
| Virus | Halorubrum pleomorphic virus 2                                 | 16              | 2               | DNA          | NA                 |
| Virus | Halorubrum pleomorphic virus 3                                 | 13              | 2               | DNA          | 3                  |
| Virus | Halorubrum pleomorphic virus 6                                 | 11              | 2               | DNA          | NA                 |
| Virus | Halovirus HF1                                                  | 102             | 1               | DNA          | NA                 |
| Virus | Hamster polyomavirus                                           | 6               | 1               | DNA          | 3                  |
| Virus | Hantaan virus                                                  | 5               | 5               | RNA          | NA                 |
| Virus | Hantavirus Z10                                                 | 3               | 5               | RNA          | NA                 |
| Virus | Hardenbergia mosaic virus                                      | 12              | 4               | RNA          | 1                  |
| Virus | Hardenbergia virus A                                           | 2               | 4               | RNA          | 1                  |
| Virus | Helicobacter phage phiHP33                                     | 27              | 1               | DNA          | 4                  |
| Virus | Helicobasidium mompa endornavirus 1                            | 1               | 3               | RNA          | NA                 |
| Virus | Helicobasidium mompa No.17 dsRNA virus                         | 3               | 3               | RNA          | NA                 |
| Virus | Helicoverpa armigera densovirus                                | 3               | 2               | DNA          | 3                  |
| Virus | Helicoverpa armigera granulovirus                              | 179             | 1               | DNA          | NA                 |
| Virus | Helicoverpa armigera multiple nucleopolyhedrovirus             | 162             | 1               | DNA          | NA                 |
| Virus | Helicoverpa armigera NPV                                       | 137             | 1               | DNA          | NA                 |
| Virus | Helicoverpa armigera NPV NNg1                                  | 143             | 1               | DNA          | NA                 |
| Virus | Helicoverpa armigera nucleopolyhedrovirus G4                   | 135             | 1               | DNA          | NA                 |
| Virus | Helicoverpa armigera stunt virus                               | 3               | 4               | RNA          | 1                  |
| Virus | Helicoverpa zea nudivirus 2                                    | 113             | 1               | DNA          | NA                 |
| Virus | Helicoverpa zea SNPV                                           | 139             | 1               | DNA          | NA                 |

| Type  | Name                                                                 | Number of genes | Baltimore class | Nucleic Acid | Monophyletic group |
|-------|----------------------------------------------------------------------|-----------------|-----------------|--------------|--------------------|
| Virus | Heliothis armigera cypovirus 5                                       | 4               | 3               | RNA          | NA                 |
| Virus | Heliothis virescens ascovirus 3e                                     | 180             | 1               | DNA          | 5                  |
| Virus | Helleborus net necrosis virus                                        | 6               | 4               | RNA          | 1                  |
| Virus | Helminthosporium victoriae 145S virus                                | 4               | 3               | RNA          | NA                 |
| Virus | Helminthosporium victoriae virus 190S                                | 2               | 3               | RNA          | NA                 |
| Virus | Hendra virus                                                         | 8               | 5               | RNA          | NA                 |
| Virus | Hepatitis A virus                                                    | 14              | 4               | RNA          | 1                  |
| Virus | Hepatitis B virus                                                    | 7               | 7               | DNA          | 2                  |
| Virus | Hepatitis C virus                                                    | 12              | 4               | RNA          | 1                  |
| Virus | Hepatitis C virus genotype 2                                         | 1               | 4               | RNA          | 1                  |
| Virus | Hepatitis C virus genotype 3                                         | 10              | 4               | RNA          | 1                  |
| Virus | Hepatitis C virus genotype 4                                         | 1               | 4               | RNA          | 1                  |
| Virus | Hepatitis C virus genotype 5                                         | 1               | 4               | RNA          | 1                  |
| Virus | Hepatitis C virus genotype 6                                         | 1               | 4               | RNA          | 1                  |
| Virus | Hepatitis delta virus                                                | 2               | 5               | RNA          | NA                 |
| Virus | Hepatitis E virus                                                    | 3               | 4               | RNA          | 1                  |
| Virus | Hepatitis GB virus B                                                 | 11              | 4               | RNA          | 1                  |
| Virus | Heron hepatitis B virus                                              | 4               | 7               | DNA          | 2                  |
| Virus | Heterocapsa circularisquama RNA virus                                | 2               | 4               | RNA          | 1                  |
| Virus | Heterosigma akashiwo RNA virus                                       | 1               | 4               | RNA          | 1                  |
| Virus | Hibiscus chlorotic ringspot virus                                    | 7               | 4               | RNA          | 1                  |
| Virus | Hibiscus green spot virus                                            | 8               | 4               | RNA          | NA                 |
| Virus | Hibiscus latent Singapore virus                                      | 4               | 4               | RNA          | 1                  |
| Virus | Highlands J virus                                                    | 13              | 4               | RNA          | 1                  |
| Virus | Himetobi P virus                                                     | 2               | 4               | RNA          | 1                  |
| Virus | Hippeastrum latent virus                                             | 6               | 4               | RNA          | 1                  |
| Virus | Hippeastrum mosaic virus                                             | 11              | 4               | RNA          | 1                  |
| Virus | Hirame rhabdovirus                                                   | 6               | 5               | RNA          | NA                 |
| Virus | His1 virus                                                           | 35              | 1               | DNA          | NA                 |
| Virus | His2 virus                                                           | 35              | 1               | DNA          | NA                 |
| Virus | HMO Astrovirus A                                                     | 3               | 4               | RNA          | 1                  |
| Virus | Hollyhock leaf crumple virus                                         | 6               | 2               | DNA          | 3                  |
| Virus | Hollyhock yellow vein mosaic virus                                   | 6               | 2               | DNA          | 3                  |
| Virus | Homalodisca coagulata virus-1                                        | 2               | 4               | RNA          | 1                  |
| Virus | Homalodisca vitripennis reovirus                                     | 13              | 3               | RNA          | NA                 |
| Virus | Honeysuckle ringspot virus                                           | 6               | 4               | RNA          | 1                  |
| Virus | Honeysuckle yellow vein betasatellite                                | 1               | 2               | DNA          | 3                  |
| Virus | Honeysuckle yellow vein mosaic disease associated satellite DNA beta | 1               | 2               | DNA          | NA                 |
| Virus | Honeysuckle yellow vein mosaic virus                                 | 6               | 2               | DNA          | 3                  |
| Virus | Honeysuckle yellow vein virus                                        | 6               | 2               | DNA          | 3                  |
| Virus | Hop latent virus                                                     | 6               | 4               | RNA          | 1                  |
| Virus | Hop mosaic virus                                                     | 6               | 4               | RNA          | 1                  |
| Virus | Hordeum mosaic virus                                                 | 12              | 4               | RNA          | 1                  |
| Virus | Horsegram yellow mosaic virus                                        | 8               | 2               | DNA          | 3                  |
| Virus | Horseradish curly top virus                                          | 6               | 2               | DNA          | 3                  |
| Virus | Horseradish latent virus                                             | 8               | 7               | DNA          | 2                  |
| Virus | Hosta virus X                                                        | 5               | 4               | RNA          | 1                  |
| Virus | Human adenovirus 1                                                   | 36              | 1               | DNA          | NA                 |
| Virus | Human adenovirus 2                                                   | 36              | 1               | DNA          | NA                 |
| Virus | Human adenovirus 35                                                  | 37              | 1               | DNA          | NA                 |
| Virus | Human adenovirus 5                                                   | 36              | 1               | DNA          | NA                 |
| Virus | Human adenovirus 54                                                  | 36              | 1               | DNA          | NA                 |
| Virus | Human adenovirus 7                                                   | 37              | 1               | DNA          | NA                 |
| Virus | Human adenovirus A                                                   | 71              | 1               | DNA          | NA                 |
| Virus | Human adenovirus B                                                   | 77              | 1               | DNA          | NA                 |
| Virus | Human adenovirus C                                                   | 38              | 1               | DNA          | NA                 |
| Virus | Human adenovirus D                                                   | 57              | 1               | DNA          | NA                 |
| Virus | Human adenovirus E                                                   | 38              | 1               | DNA          | NA                 |
| Virus | Human adenovirus F                                                   | 34              | 1               | DNA          | NA                 |
| Virus | Human bocavirus                                                      | 4               | 2               | DNA          | 3                  |
| Virus | Human bocavirus 2                                                    | 4               | 2               | DNA          | 3                  |
| Virus | Human bocavirus 3                                                    | 4               | 2               | DNA          | 3                  |
| Virus | Human bocavirus 4                                                    | 5               | 2               | DNA          | 3                  |
| Virus | Human coronavirus 229E                                               | 8               | 4               | RNA          | NA                 |
| Virus | Human coronavirus HKU1                                               | 23              | 4               | RNA          | NA                 |
| Virus | Human coronavirus NL63                                               | 6               | 4               | RNA          | NA                 |
| Virus | Human coronavirus OC43                                               | 9               | 4               | RNA          | NA                 |
| Virus | Human cosavirus A                                                    | 12              | 4               | RNA          | 1                  |
| Virus | Human cosavirus B                                                    | 12              | 4               | RNA          | 1                  |
| Virus | Human cosavirus D                                                    | 12              | 4               | RNA          | 1                  |
| Virus | Human cosavirus E                                                    | 12              | 4               | RNA          | 1                  |
| Virus | Human enteric coronavirus strain 4408                                | 12              | 4               | RNA          | NA                 |
| Virus | Human enterovirus 100                                                | 12              | 4               | RNA          | 1                  |
| Virus | Human enterovirus 107                                                | 12              | 4               | RNA          | 1                  |
| Virus | Human enterovirus 98                                                 | 12              | 4               | RNA          | 1                  |
| Virus | Human enterovirus A                                                  | 12              | 4               | RNA          | 1                  |
| Virus | Human enterovirus B                                                  | 12              | 4               | RNA          | 1                  |
| Virus | Human enterovirus C                                                  | 12              | 4               | RNA          | 1                  |
| Virus | Human enterovirus C109                                               | 12              | 4               | RNA          | 1                  |
| Virus | Human enterovirus D                                                  | 17              | 4               | RNA          | 1                  |

| Type  | Name                                  | Number of genes | Baltimore class | Nucleic Acid | Monophyletic group |
|-------|---------------------------------------|-----------------|-----------------|--------------|--------------------|
| Virus | Human erythrovirus V9                 | 6               | 2               | DNA          | 3                  |
| Virus | Human herpesvirus 1                   | 77              | 1               | DNA          | NA                 |
| Virus | Human herpesvirus 2                   | 77              | 1               | DNA          | NA                 |
| Virus | Human herpesvirus 3                   | 73              | 1               | DNA          | NA                 |
| Virus | Human herpesvirus 4                   | 94              | 1               | DNA          | NA                 |
| Virus | Human herpesvirus 4 type 2            | 80              | 1               | DNA          | NA                 |
| Virus | Human herpesvirus 5                   | 168             | 1               | DNA          | NA                 |
| Virus | Human herpesvirus 6                   | 192             | 1               | DNA          | NA                 |
| Virus | Human herpesvirus 7                   | 86              | 1               | DNA          | NA                 |
| Virus | Human herpesvirus 8                   | 86              | 1               | DNA          | NA                 |
| Virus | Human immunodeficiency virus 1        | 27              | 6               | RNA          | 2                  |
| Virus | Human immunodeficiency virus 2        | 9               | 6               | RNA          | 2                  |
| Virus | Human klassevirus 1                   | 1               | 4               | RNA          | 1                  |
| Virus | Human metapneumovirus                 | 9               | 5               | RNA          | NA                 |
| Virus | Human papillomavirus                  | 6               | 1               | DNA          | 3                  |
| Virus | Human papillomavirus - 1              | 7               | 1               | DNA          | 3                  |
| Virus | Human papillomavirus - 18             | 8               | 1               | DNA          | 3                  |
| Virus | Human papillomavirus - 2              | 7               | 1               | DNA          | 3                  |
| Virus | Human papillomavirus 109              | 7               | 1               | DNA          | 3                  |
| Virus | Human papillomavirus 112              | 7               | 1               | DNA          | 3                  |
| Virus | Human papillomavirus 116              | 7               | 1               | DNA          | 3                  |
| Virus | Human papillomavirus 121              | 7               | 1               | DNA          | 3                  |
| Virus | Human papillomavirus type 10          | 7               | 1               | DNA          | 3                  |
| Virus | Human papillomavirus type 101         | 6               | 1               | DNA          | 3                  |
| Virus | Human papillomavirus type 103         | 6               | 1               | DNA          | 3                  |
| Virus | Human papillomavirus type 108         | 5               | 1               | DNA          | 3                  |
| Virus | Human papillomavirus type 126         | 7               | 1               | DNA          | 3                  |
| Virus | Human papillomavirus type 128         | 7               | 1               | DNA          | 3                  |
| Virus | Human papillomavirus type 129         | 7               | 1               | DNA          | 3                  |
| Virus | Human papillomavirus type 131         | 7               | 1               | DNA          | 3                  |
| Virus | Human papillomavirus type 132         | 7               | 1               | DNA          | 3                  |
| Virus | Human papillomavirus type 134         | 7               | 1               | DNA          | 3                  |
| Virus | Human papillomavirus type 135         | 7               | 1               | DNA          | 3                  |
| Virus | Human papillomavirus type 136         | 7               | 1               | DNA          | 3                  |
| Virus | Human papillomavirus type 137         | 7               | 1               | DNA          | 3                  |
| Virus | Human papillomavirus type 140         | 7               | 1               | DNA          | 3                  |
| Virus | Human papillomavirus type 144         | 7               | 1               | DNA          | 3                  |
| Virus | Human papillomavirus type 16          | 8               | 1               | DNA          | 3                  |
| Virus | Human papillomavirus type 26          | 6               | 1               | DNA          | 3                  |
| Virus | Human papillomavirus type 32          | 6               | 1               | DNA          | 3                  |
| Virus | Human papillomavirus type 34          | 6               | 1               | DNA          | 3                  |
| Virus | Human papillomavirus type 4           | 7               | 1               | DNA          | 3                  |
| Virus | Human papillomavirus type 41          | 11              | 1               | DNA          | 3                  |
| Virus | Human papillomavirus type 48          | 7               | 1               | DNA          | 3                  |
| Virus | Human papillomavirus type 49          | 6               | 1               | DNA          | 3                  |
| Virus | Human papillomavirus type 5           | 8               | 1               | DNA          | 3                  |
| Virus | Human papillomavirus type 50          | 7               | 1               | DNA          | 3                  |
| Virus | Human papillomavirus type 53          | 7               | 1               | DNA          | 3                  |
| Virus | Human papillomavirus type 60          | 7               | 1               | DNA          | 3                  |
| Virus | Human papillomavirus type 63          | 7               | 1               | DNA          | 3                  |
| Virus | Human papillomavirus type 6b          | 9               | 1               | DNA          | 3                  |
| Virus | Human papillomavirus type 7           | 6               | 1               | DNA          | 3                  |
| Virus | Human papillomavirus type 88          | 7               | 1               | DNA          | 3                  |
| Virus | Human papillomavirus type 9           | 7               | 1               | DNA          | 3                  |
| Virus | Human papillomavirus type 90          | 7               | 1               | DNA          | 3                  |
| Virus | Human papillomavirus type 92          | 7               | 1               | DNA          | 3                  |
| Virus | Human papillomavirus type 96          | 7               | 1               | DNA          | 3                  |
| Virus | Human parainfluenza virus 1           | 10              | 5               | RNA          | NA                 |
| Virus | Human parainfluenza virus 2           | 7               | 5               | RNA          | NA                 |
| Virus | Human parainfluenza virus 3           | 8               | 5               | RNA          | NA                 |
| Virus | Human parechovirus                    | 11              | 4               | RNA          | 1                  |
| Virus | Human parvovirus 4                    | 2               | 2               | DNA          | 3                  |
| Virus | Human parvovirus B19                  | 6               | 2               | DNA          | 3                  |
| Virus | Human picobirnavirus                  | 3               | 1               | DNA          | 1                  |
| Virus | Human polyomavirus 9                  | 5               | 1               | DNA          | 3                  |
| Virus | Human respiratory syncytial virus     | 11              | 5               | RNA          | NA                 |
| Virus | Human rhinovirus A                    | 12              | 4               | RNA          | 1                  |
| Virus | Human rhinovirus B14                  | 12              | 4               | RNA          | 1                  |
| Virus | Human rhinovirus C                    | 12              | 4               | RNA          | 1                  |
| Virus | Human T-lymphotropic virus 1          | 11              | 6               | RNA          | 2                  |
| Virus | Human T-lymphotropic virus 2          | 10              | 6               | RNA          | 2                  |
| Virus | Human T-lymphotropic virus 4          | 6               | 6               | RNA          | 2                  |
| Virus | Human TMEV-like cardiovirus           | 13              | 4               | RNA          | 1                  |
| Virus | Humulus japonicus latent virus        | 4               | 4               | RNA          | 1                  |
| Virus | Hydrangea chlorotic mottle virus      | 6               | 4               | RNA          | 1                  |
| Virus | Hydrangea ringspot virus              | 6               | 4               | RNA          | 1                  |
| Virus | Hyperthermophilic Archaeal Virus 1    | 40              | 1               | DNA          | NA                 |
| Virus | Hyperthermophilic Archaeal Virus 2    | 15              | NA              | NA           | NA                 |
| Virus | Hyphantria cunea nucleopolyhedrovirus | 148             | 1               | DNA          | NA                 |
| Virus | Hyposoter fugitivus ichnovirus        | 143             | 1               | DNA          | NA                 |

| Type  | Name                                                   | Number of genes | Baltimore class | Nucleic Acid | Monophyletic group |
|-------|--------------------------------------------------------|-----------------|-----------------|--------------|--------------------|
| Virus | Ictalurid herpesvirus 1                                | 90              | 1               | DNA          | NA                 |
| Virus | Ikoma lyssavirus                                       | 5               | 5               | RNA          | NA                 |
| Virus | Ilheus virus                                           | 1               | 4               | RNA          | 1                  |
| Virus | Impatiens necrotic spot virus                          | 5               | 5               | RNA          | NA                 |
| Virus | Imperata yellow mottle virus                           | 4               | 4               | RNA          | 1                  |
| Virus | Indian cassava mosaic virus                            | 10              | 2               | DNA          | 3                  |
| Virus | Indian citrus ringspot virus                           | 6               | 4               | RNA          | 1                  |
| Virus | Indian peanut clump virus                              | 8               | 4               | RNA          | 1                  |
| Virus | Infectious bronchitis virus                            | 24              | 4               | RNA          | NA                 |
| Virus | Infectious bursal disease virus                        | 3               | 3               | RNA          | NA                 |
| Virus | Infectious flacherie virus                             | 1               | 4               | RNA          | 1                  |
| Virus | Infectious hematopoietic necrosis virus                | 6               | 5               | RNA          | NA                 |
| Virus | Infectious hypodermal and hematopoietic necrosis virus | 3               | 2               | DNA          | 3                  |
| Virus | Infectious pancreatic necrosis virus                   | 3               | 3               | RNA          | NA                 |
| Virus | Infectious salmon anemia virus                         | 10              | 5               | RNA          | NA                 |
| Virus | Infectious spleen and kidney necrosis virus            | 125             | 1               | DNA          | 5                  |
| Virus | Influenza A virus (A/Goose/Guangdong/1/96(H5N1))       | 14              | 5               | RNA          | NA                 |
| Virus | Influenza A virus (A/Hong Kong/1073/99(H9N2))          | 14              | 5               | RNA          | NA                 |
| Virus | Influenza A virus (A/Korea/426/1968(H2N2))             | 3               | 5               | RNA          | NA                 |
| Virus | Influenza A virus (A/Korea/426/68(H2N2))               | 11              | 5               | RNA          | NA                 |
| Virus | Influenza A virus (A/New York/392/2004(H3N2))          | 14              | 5               | RNA          | NA                 |
| Virus | Influenza A virus (A/Puerto Rico/8/1934(H1N1))         | 2               | 5               | RNA          | NA                 |
| Virus | Influenza A virus (A/Puerto Rico/8/34(H1N1))           | 12              | 5               | RNA          | NA                 |
| Virus | Influenza B virus                                      | 11              | 5               | RNA          | NA                 |
| Virus | Influenza C virus (C/Ann Arbor/1/50)                   | 9               | 5               | RNA          | NA                 |
| Virus | Invertebrate iridescent virus 3                        | 126             | 1               | DNA          | 5                  |
| Virus | Invertebrate iridescent virus 6                        | 468             | 1               | DNA          | 5                  |
| Virus | Iodobacteriophage phiPLPE                              | 84              | 1               | DNA          | 4                  |
| Virus | Iotapapillomavirus 1                                   | 6               | 1               | DNA          | 3                  |
| Virus | Ipomoea yellow vein virus                              | 6               | 2               | DNA          | 3                  |
| Virus | Ippy virus                                             | 4               | 5               | RNA          | NA                 |
| Virus | Iranian johnsongrass mosaic virus                      | 1               | 4               | RNA          | 1                  |
| Virus | Israeli acute paralysis virus                          | 3               | 4               | RNA          | 1                  |
| Virus | J-virus                                                | 11              | 5               | RNA          | NA                 |
| Virus | Jaagsiekte sheep retrovirus                            | 5               | 6               | RNA          | 2                  |
| Virus | Japanese eel endothelial cells-infecting virus         | 1               | 1               | DNA          | NA                 |
| Virus | Japanese encephalitis virus                            | 16              | 4               | RNA          | 1                  |
| Virus | Japanese holly fern mottle virus                       | 5               | 3               | RNA          | NA                 |
| Virus | Japanese iris necrotic ring virus                      | 6               | 4               | RNA          | 1                  |
| Virus | Japanese yam mosaic virus                              | 12              | 4               | RNA          | 1                  |
| Virus | Jatropha leaf curl virus                               | 6               | 2               | DNA          | 3                  |
| Virus | Jatropha mosaic Nigerian virus                         | 6               | 2               | DNA          | 3                  |
| Virus | Jatropha yellow mosaic India virus                     | 6               | 2               | DNA          | 3                  |
| Virus | JC polyomavirus                                        | 6               | 1               | DNA          | 3                  |
| Virus | Johnsongrass chlorotic stripe mosaic virus             | 5               | 4               | RNA          | 1                  |
| Virus | Johnsongrass mosaic virus                              | 12              | 4               | RNA          | 1                  |
| Virus | Junin virus                                            | 6               | 5               | RNA          | NA                 |
| Virus | Junonia coenia densovirus                              | 4               | 2               | DNA          | 3                  |
| Virus | Kadipiro virus                                         | 12              | 3               | RNA          | NA                 |
| Virus | Kakugo virus                                           | 1               | 4               | RNA          | 1                  |
| Virus | Kalanchoe latent virus                                 | 7               | 4               | RNA          | 1                  |
| Virus | Kalanchoe top-spotting virus                           | 3               | 7               | DNA          | 2                  |
| Virus | Kamiti River virus                                     | 14              | 4               | RNA          | 1                  |
| Virus | Kappapapillomavirus 1                                  | 9               | 1               | DNA          | 3                  |
| Virus | Kappapapillomavirus 2                                  | 10              | 1               | DNA          | 3                  |
| Virus | Karshi virus                                           | 1               | 4               | RNA          | 1                  |
| Virus | Kashmir bee virus                                      | 7               | 4               | RNA          | 1                  |
| Virus | Kedougou virus                                         | 1               | 4               | RNA          | 1                  |
| Virus | Kelp fly virus                                         | 1               | 4               | RNA          | NA                 |
| Virus | Kennedya yellow mosaic virus                           | 3               | 4               | RNA          | 1                  |
| Virus | Keunjong mosaic virus                                  | 12              | 4               | RNA          | 1                  |
| Virus | KI polyomavirus                                        | 5               | 1               | DNA          | 3                  |
| Virus | Klebsiella phage K11                                   | 51              | 1               | DNA          | 4                  |
| Virus | Klebsiella phage KP15                                  | 258             | 1               | DNA          | 4                  |
| Virus | Klebsiella phage KP32                                  | 44              | 1               | DNA          | 4                  |
| Virus | Klebsiella phage KP34                                  | 57              | 1               | DNA          | 4                  |
| Virus | Klebsiella phage phiKO2                                | 64              | 1               | DNA          | 4                  |
| Virus | Kluyvera phage Kvp1                                    | 47              | 1               | DNA          | 4                  |
| Virus | Kokobera virus                                         | 1               | 4               | RNA          | 1                  |
| Virus | Konjac mosaic virus                                    | 12              | 4               | RNA          | 1                  |
| Virus | Kotonkan virus                                         | 11              | 5               | RNA          | NA                 |
| Virus | Kudzu mosaic virus                                     | 8               | 2               | DNA          | 3                  |
| Virus | Kyuri green mottle mosaic virus                        | 4               | 4               | RNA          | 1                  |
| Virus | La Crosse virus                                        | 4               | 5               | RNA          | NA                 |
| Virus | Lactate dehydrogenase-elevating virus                  | 12              | 4               | RNA          | NA                 |
| Virus | Lactobacillus johnsonii prophage Lj771                 | 56              | NA              | NA           | NA                 |
| Virus | Lactobacillus phage A2                                 | 62              | 1               | DNA          | 4                  |
| Virus | Lactobacillus phage KC5a                               | 61              | 1               | DNA          | 4                  |
| Virus | Lactobacillus phage Lb338-1                            | 199             | 1               | DNA          | 4                  |
| Virus | Lactobacillus phage Lc-Nu                              | 51              | 1               | DNA          | 4                  |



| Type  | Name                                                     | Number of genes | Baltimore class | Nucleic Acid | Monophyletic group |
|-------|----------------------------------------------------------|-----------------|-----------------|--------------|--------------------|
| Virus | Lactobacillus phage LL-H                                 | 51              | 1               | DNA          | 4                  |
| Virus | Lactobacillus phage LP65                                 | 165             | 1               | DNA          | 4                  |
| Virus | Lactobacillus phage Lrm1                                 | 54              | 1               | DNA          | 4                  |
| Virus | Lactobacillus phage Lv-1                                 | 47              | 1               | DNA          | 4                  |
| Virus | Lactobacillus phage phiadh                               | 63              | 1               | DNA          | 4                  |
| Virus | Lactobacillus phage phiAT3                               | 55              | 1               | DNA          | 4                  |
| Virus | Lactobacillus phage phig1e                               | 60              | 1               | DNA          | 4                  |
| Virus | Lactobacillus phage phiJL-1                              | 46              | 1               | DNA          | 4                  |
| Virus | Lactobacillus prophage Lj928                             | 50              | 1               | DNA          | 4                  |
| Virus | Lactobacillus prophage Lj965                             | 46              | 1               | DNA          | 4                  |
| Virus | Lactococcus phage 1706                                   | 76              | 1               | DNA          | 4                  |
| Virus | Lactococcus phage 712                                    | 55              | 1               | DNA          | 4                  |
| Virus | Lactococcus phage 949                                    | 154             | 1               | DNA          | 4                  |
| Virus | Lactococcus phage asccphi28                              | 28              | 1               | DNA          | 4                  |
| Virus | Lactococcus phage bIBB29                                 | 54              | 1               | DNA          | 4                  |
| Virus | Lactococcus phage bIL285                                 | 62              | 1               | DNA          | 4                  |
| Virus | Lactococcus phage bIL286                                 | 61              | 1               | DNA          | 4                  |
| Virus | Lactococcus phage bIL309                                 | 56              | 1               | DNA          | 4                  |
| Virus | Lactococcus phage bIL310                                 | 29              | 1               | DNA          | 4                  |
| Virus | Lactococcus phage bIL311                                 | 22              | 1               | DNA          | 4                  |
| Virus | Lactococcus phage bIL312                                 | 27              | 1               | DNA          | 4                  |
| Virus | Lactococcus phage bIL67                                  | 37              | 1               | DNA          | 4                  |
| Virus | Lactococcus phage BK5-T                                  | 63              | 1               | DNA          | 4                  |
| Virus | Lactococcus phage c2                                     | 39              | 1               | DNA          | 4                  |
| Virus | Lactococcus phage jj50                                   | 49              | 1               | DNA          | 4                  |
| Virus | Lactococcus phage KSY1                                   | 130             | 1               | DNA          | 4                  |
| Virus | Lactococcus phage P087                                   | 88              | 1               | DNA          | 4                  |
| Virus | Lactococcus phage P335 sensu lato                        | 49              | 1               | DNA          | 4                  |
| Virus | Lactococcus phage phiLC3                                 | 51              | 1               | DNA          | 4                  |
| Virus | Lactococcus phage Q54                                    | 47              | 1               | DNA          | 4                  |
| Virus | Lactococcus phage r1t                                    | 50              | 1               | DNA          | 4                  |
| Virus | Lactococcus phage sk1                                    | 56              | 1               | DNA          | 4                  |
| Virus | Lactococcus phage TP901-1                                | 56              | 1               | DNA          | 4                  |
| Virus | Lactococcus phage Tuc2009                                | 56              | 1               | DNA          | 4                  |
| Virus | Lactococcus phage ul36                                   | 61              | 1               | DNA          | 4                  |
| Virus | Lambdapapillomavirus 2                                   | 7               | 1               | DNA          | 3                  |
| Virus | Lambdapapillomavirus 3                                   | 7               | 1               | DNA          | 3                  |
| Virus | Lamium leaf distortion virus                             | 6               | 7               | DNA          | 2                  |
| Virus | Langat virus                                             | 11              | 4               | RNA          | 1                  |
| Virus | Lassa virus                                              | 4               | 5               | RNA          | NA                 |
| Virus | Latino virus                                             | 4               | 5               | RNA          | NA                 |
| Virus | Lausannevirus                                            | 444             | 1               | DNA          | 5                  |
| Virus | Leek white stripe virus                                  | 5               | 4               | RNA          | 1                  |
| Virus | Leek yellow stripe virus                                 | 12              | 4               | RNA          | 1                  |
| Virus | Leishmania RNA virus 1 - 1                               | 3               | 3               | RNA          | NA                 |
| Virus | Leishmania RNA virus 1 - 4                               | 2               | 3               | RNA          | NA                 |
| Virus | Leishmania RNA virus 2 - 1                               | 3               | 3               | RNA          | NA                 |
| Virus | Lettuce big-vein associated virus                        | 6               | 4               | RNA          | 1                  |
| Virus | Lettuce chlorosis virus                                  | 14              | 4               | RNA          | 1                  |
| Virus | Lettuce infectious yellows virus                         | 9               | 4               | RNA          | 1                  |
| Virus | Lettuce mosaic virus                                     | 12              | 4               | RNA          | 1                  |
| Virus | Lettuce necrotic stunt virus                             | 6               | 4               | RNA          | 1                  |
| Virus | Lettuce necrotic yellows virus                           | 6               | 5               | RNA          | NA                 |
| Virus | Lettuce ring necrosis virus                              | 5               | 5               | RNA          | NA                 |
| Virus | Lettuce virus X                                          | 5               | 4               | RNA          | 1                  |
| Virus | Lettuce yellow mottle virus                              | 6               | 5               | RNA          | NA                 |
| Virus | Leucania separata nuclear polyhedrosis virus             | 169             | 1               | DNA          | NA                 |
| Virus | Leucas zeylanica yellow vein virus satellite DNA beta    | 1               | 2               | DNA          | 3                  |
| Virus | Leuconostoc phage Lmd1                                   | 40              | 1               | DNA          | 4                  |
| Virus | Liao ning virus                                          | 12              | 3               | RNA          | NA                 |
| Virus | Ligustrum necrotic ringspot virus                        | 6               | 4               | RNA          | 1                  |
| Virus | Lily mottle virus                                        | 12              | 4               | RNA          | 1                  |
| Virus | Lily symptomless virus                                   | 6               | 4               | RNA          | 1                  |
| Virus | Lily virus X                                             | 5               | 4               | RNA          | 1                  |
| Virus | Lindernia anagallis yellow vein virus                    | 6               | 2               | DNA          | 3                  |
| Virus | Lindernia anagallis yellow vein virus satellite DNA beta | 1               | 2               | DNA          | 3                  |
| Virus | Lisianthus necrosis virus                                | 5               | 4               | RNA          | 1                  |
| Virus | Listeria phage 2389                                      | 59              | 1               | DNA          | 4                  |
| Virus | Listeria phage A006                                      | 64              | 1               | DNA          | 4                  |
| Virus | Listeria phage A118                                      | 72              | 1               | DNA          | 4                  |
| Virus | Listeria phage A500                                      | 63              | 1               | DNA          | 4                  |
| Virus | Listeria phage A511                                      | 201             | 1               | DNA          | 4                  |
| Virus | Listeria phage B025                                      | 66              | 1               | DNA          | 4                  |
| Virus | Listeria phage B054                                      | 80              | 1               | DNA          | 4                  |
| Virus | Listeria phage P35                                       | 56              | 1               | DNA          | 4                  |
| Virus | Listeria phage P40                                       | 62              | 1               | DNA          | 4                  |
| Virus | Listeria phage P70                                       | 119             | 1               | DNA          | 4                  |
| Virus | Listonella phage phiHSIC                                 | 47              | 1               | DNA          | 4                  |
| Virus | Little cherry virus 1                                    | 10              | 4               | RNA          | 1                  |
| Virus | Little cherry virus 2                                    | 10              | 4               | RNA          | 1                  |

| Type  | Name                                                            | Number of genes | Baltimore class | Nucleic Acid | Monophyletic group |
|-------|-----------------------------------------------------------------|-----------------|-----------------|--------------|--------------------|
| Virus | Ljungan virus                                                   | 12              | 4               | RNA          | 1                  |
| Virus | Lloviu virus                                                    | 9               | 5               | RNA          | NA                 |
| Virus | Lolium latent virus                                             | 6               | 4               | RNA          | 1                  |
| Virus | Louping ill virus                                               | 14              | 4               | RNA          | 1                  |
| Virus | Lucerne transient streak virus                                  | 8               | 4               | RNA          | 1                  |
| Virus | Lucky bamboo bacilliform virus                                  | 7               | 7               | DNA          | 2                  |
| Virus | Ludwigia yellow vein virus                                      | 6               | 2               | DNA          | 3                  |
| Virus | Ludwigia yellow vein virus-associated DNA beta                  | 1               | 2               | DNA          | NA                 |
| Virus | Luffa begomovirus associated DNA beta                           | 1               | 2               | DNA          | 3                  |
| Virus | Luffa puckering and leaf distortion-associated DNA beta         | 1               | 2               | DNA          | 3                  |
| Virus | Luffa yellow mosaic virus                                       | 8               | 2               | DNA          | 3                  |
| Virus | Lull virus                                                      | 2               | 2               | DNA          | 3                  |
| Virus | Lujo virus                                                      | 4               | 5               | RNA          | NA                 |
| Virus | Lumpy skin disease virus NI-2490                                | 156             | 1               | DNA          | 5                  |
| Virus | Luna virus                                                      | 4               | 5               | RNA          | NA                 |
| Virus | Lunk virus NKS-1                                                | 4               | 5               | RNA          | NA                 |
| Virus | Lupine mosaic virus                                             | 12              | 4               | RNA          | 1                  |
| Virus | Lymantria dispar MNPV                                           | 164             | 1               | DNA          | NA                 |
| Virus | Lymantria xyliina MNPV                                          | 157             | 1               | DNA          | NA                 |
| Virus | Lymphocystis disease virus - isolate China                      | 239             | 1               | DNA          | 5                  |
| Virus | Lymphocystis disease virus 1                                    | 110             | 1               | DNA          | 5                  |
| Virus | Lymphocytic choriomeningitis virus                              | 4               | 5               | RNA          | NA                 |
| Virus | Macaca fascicularis papillomavirus 2                            | 7               | 1               | DNA          | 3                  |
| Virus | Macacine herpesvirus 1                                          | 75              | 1               | DNA          | NA                 |
| Virus | Macacine herpesvirus 3                                          | 223             | 1               | DNA          | NA                 |
| Virus | Macacine herpesvirus 4                                          | 80              | 1               | DNA          | NA                 |
| Virus | Macacine herpesvirus 5                                          | 89              | 1               | DNA          | NA                 |
| Virus | Macaque simian foamy virus                                      | 5               | 6               | RNA          | 2                  |
| Virus | Machupo virus                                                   | 4               | 5               | RNA          | NA                 |
| Virus | Macrobrachium rosenbergii nodavirus                             | 3               | 4               | RNA          | 1                  |
| Virus | Macrobrachium rosenbergii Taihu virus                           | 2               | 4               | RNA          | NA                 |
| Virus | Macropodium golden mosaic virus                                 | 6               | 2               | DNA          | 3                  |
| Virus | Macropodium mosaic Puerto Rico virus                            | 7               | 2               | DNA          | 3                  |
| Virus | Macropodium yellow mosaic Florida virus                         | 7               | 2               | DNA          | 3                  |
| Virus | Macropodium yellow mosaic virus                                 | 7               | 2               | DNA          | 3                  |
| Virus | Macropodium yellow net virus                                    | 7               | 2               | DNA          | 3                  |
| Virus | Macropodium yellow spot virus                                   | 5               | 2               | DNA          | 3                  |
| Virus | Macropodium yellow vein virus                                   | 5               | 2               | DNA          | 3                  |
| Virus | Magnaporthe oryzae chrysovirus 1                                | 4               | 3               | RNA          | NA                 |
| Virus | Magnaporthe oryzae virus 1                                      | 2               | 3               | RNA          | NA                 |
| Virus | Magnaporthe oryzae virus 2                                      | 2               | 3               | RNA          | NA                 |
| Virus | Magpie-robin coronavirus HKU18                                  | 9               | 4               | RNA          | NA                 |
| Virus | Maize chlorotic dwarf virus                                     | 8               | 4               | RNA          | 1                  |
| Virus | Maize chlorotic mottle virus                                    | 6               | 4               | RNA          | 1                  |
| Virus | Maize dwarf mosaic virus                                        | 11              | 4               | RNA          | 1                  |
| Virus | Maize fine streak virus                                         | 7               | 5               | RNA          | NA                 |
| Virus | Maize Iranian mosaic virus                                      | 6               | 5               | RNA          | NA                 |
| Virus | Maize mosaic virus                                              | 6               | 5               | RNA          | NA                 |
| Virus | Maize necrotic streak virus                                     | 5               | 4               | RNA          | 1                  |
| Virus | maize rayado fino virus                                         | 3               | 4               | RNA          | 1                  |
| Virus | Maize rayado fino virus                                         | 2               | 4               | RNA          | 1                  |
| Virus | Maize streak Reunion virus                                      | 4               | 2               | DNA          | 3                  |
| Virus | Maize streak virus                                              | 5               | 2               | DNA          | 3                  |
| Virus | Maize white line mosaic virus                                   | 5               | 4               | RNA          | 1                  |
| Virus | Mal de Rio Cuarto virus                                         | 12              | 3               | RNA          | NA                 |
| Virus | Malachra yellow vein mosaic virus-associated satellite DNA beta | 1               | 2               | DNA          | 3                  |
| Virus | Malva mosaic virus                                              | 5               | 4               | RNA          | 1                  |
| Virus | Malvastrum leaf curl betasatellite                              | 1               | 2               | DNA          | 3                  |
| Virus | Malvastrum leaf curl Guangdong virus                            | 6               | 2               | DNA          | 3                  |
| Virus | Malvastrum leaf curl virus                                      | 6               | 2               | DNA          | 3                  |
| Virus | Malvastrum yellow mosaic alphasatellite                         | 1               | NA              | NA           | NA                 |
| Virus | Malvastrum yellow mosaic Cameroon alphasatellite                | 1               | NA              | NA           | NA                 |
| Virus | Malvastrum yellow mosaic virus                                  | 6               | 2               | DNA          | 3                  |
| Virus | Malvastrum yellow mosaic virus satellite DNA beta               | 1               | 2               | DNA          | 3                  |
| Virus | Malvastrum yellow vein Baoshan virus                            | 6               | 2               | DNA          | 3                  |
| Virus | Malvastrum yellow vein betasatellite                            | 1               | 2               | DNA          | 3                  |
| Virus | Malvastrum yellow vein Changa Manga virus                       | 6               | 2               | DNA          | 3                  |
| Virus | Malvastrum yellow vein virus                                    | 6               | 2               | DNA          | 3                  |
| Virus | Malvastrum yellow vein Yunnan virus                             | 6               | 2               | DNA          | 3                  |
| Virus | Malvastrum yellow vein Yunnan virus satellite DNA beta          | 1               | 2               | DNA          | 3                  |
| Virus | Mama_proteome_aa_                                               | 1023            | 1               | DNA          | 5                  |
| Virus | Mamastrovirus 1                                                 | 10              | 4               | RNA          | 1                  |
| Virus | Mamastrovirus 10                                                | 3               | 4               | RNA          | 1                  |
| Virus | Mamastrovirus 13                                                | 3               | 4               | RNA          | 1                  |
| Virus | Mamestra configurata NPV-A                                      | 169             | 1               | DNA          | NA                 |
| Virus | Mamestra configurata NPV-B                                      | 168             | 1               | DNA          | NA                 |
| Virus | Mammalian orthoreovirus 3                                       | 24              | 3               | RNA          | NA                 |
| Virus | Mannheimia phage phiMHaA1                                       | 49              | 1               | DNA          | 4                  |
| Virus | Mapuera virus                                                   | 9               | 5               | RNA          | NA                 |
| Virus | Maracuja mosaic virus                                           | 4               | 4               | RNA          | 1                  |

| Type  | Name                                                     | Number of genes | Baltimore class | Nucleic Acid | Monophyletic group |
|-------|----------------------------------------------------------|-----------------|-----------------|--------------|--------------------|
| Virus | Marburg marburgvirus                                     | 7               | 5               | RNA          | NA                 |
| Virus | Marine birnavirus                                        | 3               | 3               | RNA          | NA                 |
| Virus | Marine RNA virus JP-A                                    | 2               | 4               | RNA          | 1                  |
| Virus | Marine RNA virus JP-B                                    | 2               | 4               | RNA          | NA                 |
| Virus | Marine RNA virus SOG                                     | 3               | 4               | RNA          | NA                 |
| Virus | Marinomonas phage P12026                                 | 54              | 1               | DNA          | NA                 |
| Virus | Mars_Cplete_proteome_aa                                  | 457             | 1               | DNA          | 5                  |
| Virus | Marseillevirus                                           | 428             | 1               | DNA          | 5                  |
| Virus | Maruca vitrata MNPV                                      | 126             | 1               | DNA          | NA                 |
| Virus | Mason-Pfizer monkey virus                                | 14              | 6               | RNA          | 2                  |
| Virus | Mastomys coucha papillomavirus 2                         | 6               | 1               | DNA          | 3                  |
| Virus | Mavirus                                                  | 20              | 1               | DNA          | Unconsidered       |
| Virus | Mayaro virus                                             | 14              | 4               | RNA          | 1                  |
| Virus | Measles virus                                            | 8               | 5               | RNA          | NA                 |
| Virus | Megavirus chileensis                                     | 1120            | 1               | DNA          | 5                  |
| Virus | Melandrium yellow fleck virus                            | 4               | 4               | RNA          | 1                  |
| Virus | Melanoplus sanguinipes entomopoxvirus                    | 267             | 1               | DNA          | 5                  |
| Virus | Meleagrid herpesvirus 1                                  | 79              | 1               | DNA          | NA                 |
| Virus | Melon aphid-borne yellows virus                          | 6               | 4               | RNA          | 1                  |
| Virus | Melon chlorotic mosaic virus                             | 7               | 2               | DNA          | 3                  |
| Virus | Melon chlorotic mosaic virus-associated alphasatellite   | 2               | 2               | DNA          | NA                 |
| Virus | Melon necrotic spot virus                                | 6               | 4               | RNA          | 1                  |
| Virus | Melon yellow spot virus                                  | 5               | 5               | RNA          | NA                 |
| Virus | Menangle virus                                           | 7               | 5               | RNA          | NA                 |
| Virus | Merkel cell polyomavirus                                 | 5               | 1               | DNA          | 3                  |
| Virus | Merremia mosaic Puerto Rico virus                        | 6               | 2               | DNA          | 3                  |
| Virus | Merremia mosaic virus                                    | 6               | 2               | DNA          | 3                  |
| Virus | Mesta yellow vein mosaic Bahraich virus                  | 7               | 2               | DNA          | 3                  |
| Virus | Mesta yellow vein mosaic virus                           | 6               | 2               | DNA          | 3                  |
| Virus | Mesta yellow vein mosaic virus-associated alphasatellite | 1               | NA              | NA           | NA                 |
| Virus | Mesta yellow vein mosaic virus-associated DNA beta       | 1               | 2               | DNA          | NA                 |
| Virus | Methanobacterium phage psiM2                             | 32              | 1               | DNA          | 4                  |
| Virus | Methanothermobacter phage psiM100                        | 35              | 1               | DNA          | 4                  |
| Virus | Microbacterium phage Min1                                | 77              | 1               | DNA          | 4                  |
| Virus | Microcystis phage Ma-LMM01                               | 184             | 1               | DNA          | 4                  |
| Virus | Micromonas pusilla reovirus                              | 11              | 3               | RNA          | NA                 |
| Virus | Micromonas sp. RCC1109 virus MpV1                        | 244             | 1               | DNA          | 5                  |
| Virus | Micromys minutus papillomavirus 1                        | 7               | 1               | DNA          | 3                  |
| Virus | Microplitis demolitor bracovirus                         | 53              | 1               | DNA          | NA                 |
| Virus | Microviridae phi-CA82                                    | 10              | 2               | DNA          | NA                 |
| Virus | Midway virus                                             | 6               | 5               | RNA          | NA                 |
| Virus | Mikania micrantha mosaic virus                           | 9               | 4               | RNA          | 1                  |
| Virus | Milk vetch dwarf virus                                   | 11              | 2               | DNA          | NA                 |
| Virus | Mimosa yellow leaf curl virus                            | 6               | 2               | DNA          | 3                  |
| Virus | Mimosa yellow leaf curl virus satellite DNA beta         | 1               | 2               | DNA          | 3                  |
| Virus | Mimosa yellow leaf curl virus-associated DNA 1           | 1               | 2               | DNA          | 3                  |
| Virus | Mint virus 1                                             | 11              | 4               | RNA          | 1                  |
| Virus | Mint virus X                                             | 5               | 4               | RNA          | 1                  |
| Virus | Minute virus of mice                                     | 7               | 2               | DNA          | 3                  |
| Virus | Mirabilis jalapa mottle virus                            | 6               | 4               | RNA          | 1                  |
| Virus | Mirabilis mosaic virus                                   | 7               | 7               | DNA          | 2                  |
| Virus | Mirafiore lettuce virus                                  | 7               | 5               | RNA          | NA                 |
| Virus | Miscanthus streak virus                                  | 5               | 2               | DNA          | 3                  |
| Virus | Mobala virus                                             | 4               | 5               | RNA          | NA                 |
| Virus | Modoc virus                                              | 14              | 4               | RNA          | 1                  |
| Virus | Mokola virus                                             | 5               | 5               | RNA          | NA                 |
| Virus | Molluscum contagiosum virus subtype 1                    | 163             | 1               | DNA          | 5                  |
| Virus | Moloney murine leukemia virus                            | 14              | 6               | RNA          | 2                  |
| Virus | Moloney murine sarcoma virus                             | 8               | 6               | RNA          | 2                  |
| Virus | Monkeypox virus Zaire-96-I-16                            | 191             | 1               | DNA          | 5                  |
| Virus | Montana myotis leukoencephalitis virus                   | 14              | 4               | RNA          | 1                  |
| Virus | Monve_proteome                                           | 1150            | 1               | DNA          | 5                  |
| Virus | Mopeia Lassa reassortant 29                              | 4               | 5               | RNA          | NA                 |
| Virus | Mopeia virus AN20410                                     | 4               | 5               | RNA          | NA                 |
| Virus | Morelia spilota papillomavirus 1                         | 7               | 1               | DNA          | 3                  |
| Virus | Morganella phage MmP1                                    | 49              | 1               | DNA          | 4                  |
| Virus | Moroccan watermelon mosaic virus                         | 12              | 4               | RNA          | 1                  |
| Virus | Morogoro virus                                           | 4               | 5               | RNA          | NA                 |
| Virus | Mosquito densovirus BR/07                                | 3               | 2               | DNA          | 3                  |
| Virus | Mossman virus                                            | 8               | 5               | RNA          | NA                 |
| Virus | Moumou_proteome_aa                                       | 930             | 1               | DNA          | 5                  |
| Virus | Mouse astrovirus M-52/USA/2008                           | 2               | 4               | RNA          | 1                  |
| Virus | Mouse kobuvirus M-5/USA/2010                             | 1               | 4               | RNA          | 1                  |
| Virus | Mouse mammary tumor virus                                | 14              | 6               | RNA          | 2                  |
| Virus | Mouse parvovirus 1                                       | 2               | 2               | DNA          | 3                  |
| Virus | Mouse parvovirus 2                                       | 6               | 2               | DNA          | 3                  |
| Virus | Mouse parvovirus 3                                       | 6               | 2               | DNA          | 3                  |
| Virus | Mouse parvovirus 4a                                      | 6               | 2               | DNA          | 3                  |
| Virus | Mouse parvovirus 5a                                      | 6               | 2               | DNA          | 3                  |
| Virus | Mud crab dicistrovirus                                   | 2               | 4               | RNA          | 1                  |

| Type  | Name                                             | Number of genes | Baltimore class | Nucleic Acid | Monophyletic group |
|-------|--------------------------------------------------|-----------------|-----------------|--------------|--------------------|
| Virus | Mulard duck circovirus                           | 2               | 2               | DNA          | 3                  |
| Virus | Mumps virus                                      | 8               | 5               | RNA          | NA                 |
| Virus | Mungbean yellow mosaic India virus               | 9               | 2               | DNA          | 3                  |
| Virus | Mungbean yellow mosaic virus                     | 10              | 2               | DNA          | 3                  |
| Virus | Munia coronavirus HKU13-3514                     | 9               | 4               | RNA          | NA                 |
| Virus | Murid herpesvirus 1                              | 161             | 1               | DNA          | NA                 |
| Virus | Murid herpesvirus 2                              | 167             | 1               | DNA          | NA                 |
| Virus | Murid herpesvirus 4                              | 74              | 1               | DNA          | NA                 |
| Virus | Murine adenovirus 2                              | 27              | 1               | DNA          | NA                 |
| Virus | Murine adenovirus 3                              | 28              | 1               | DNA          | NA                 |
| Virus | Murine adenovirus A                              | 55              | 1               | DNA          | NA                 |
| Virus | Murine astrovirus                                | 3               | 4               | RNA          | 1                  |
| Virus | Murine hepatitis virus strain A59                | 27              | 4               | RNA          | NA                 |
| Virus | Murine hepatitis virus strain JHM                | 27              | 4               | RNA          | NA                 |
| Virus | Murine norovirus 1                               | 10              | 4               | RNA          | 1                  |
| Virus | Murine osteosarcoma virus                        | 5               | 6               | RNA          | 2                  |
| Virus | Murine pneumotropic virus                        | 5               | 1               | DNA          | 3                  |
| Virus | Murine polyomavirus                              | 6               | 1               | DNA          | 3                  |
| Virus | Murine type C retrovirus                         | 2               | 6               | RNA          | 2                  |
| Virus | Murray Valley encephalitis virus                 | 16              | 4               | RNA          | 1                  |
| Virus | Mus musculus papillomavirus type 1               | 7               | 1               | DNA          | 3                  |
| Virus | Musca domestica salivary gland hypertrophy virus | 108             | 1               | DNA          | NA                 |
| Virus | Muscovy duck circovirus                          | 4               | 2               | DNA          | 3                  |
| Virus | Muscovy duck parvovirus                          | 4               | 2               | DNA          | 3                  |
| Virus | Mushroom bacilliform virus                       | 4               | 4               | RNA          | 1                  |
| Virus | MW polyomavirus                                  | 5               | 1               | DNA          | 3                  |
| Virus | Mycobacterium phage 244                          | 142             | 1               | DNA          | 4                  |
| Virus | Mycobacterium phage Adjutor                      | 86              | 1               | DNA          | 4                  |
| Virus | Mycobacterium phage Angel                        | 61              | 1               | DNA          | 4                  |
| Virus | Mycobacterium phage Angelica                     | 94              | 1               | DNA          | 4                  |
| Virus | Mycobacterium phage Ardmore                      | 87              | 1               | DNA          | NA                 |
| Virus | Mycobacterium phage Barnyard                     | 109             | 1               | DNA          | 4                  |
| Virus | Mycobacterium phage Bethlehem                    | 87              | 1               | DNA          | 4                  |
| Virus | Mycobacterium phage Boomer                       | 105             | 1               | DNA          | 4                  |
| Virus | Mycobacterium phage BPs                          | 63              | 1               | DNA          | 4                  |
| Virus | Mycobacterium phage Brujita                      | 74              | 1               | DNA          | 4                  |
| Virus | Mycobacterium phage Butterscotch                 | 86              | 1               | DNA          | 4                  |
| Virus | Mycobacterium phage Bxb1                         | 86              | 1               | DNA          | 4                  |
| Virus | Mycobacterium phage Bxz1                         | 225             | 1               | DNA          | 4                  |
| Virus | Mycobacterium phage Bxz2                         | 86              | 1               | DNA          | 4                  |
| Virus | Mycobacterium phage Cali                         | 222             | 1               | DNA          | 4                  |
| Virus | Mycobacterium phage Catera                       | 218             | 1               | DNA          | 4                  |
| Virus | Mycobacterium phage Chah                         | 104             | 1               | DNA          | 4                  |
| Virus | Mycobacterium phage Che12                        | 98              | 1               | DNA          | 4                  |
| Virus | Mycobacterium phage Che8                         | 112             | 1               | DNA          | 4                  |
| Virus | Mycobacterium phage Che9c                        | 84              | 1               | DNA          | 4                  |
| Virus | Mycobacterium phage Che9d                        | 111             | 1               | DNA          | 4                  |
| Virus | Mycobacterium phage Cjw1                         | 141             | 1               | DNA          | 4                  |
| Virus | Mycobacterium phage Cooper                       | 99              | 1               | DNA          | 4                  |
| Virus | Mycobacterium phage Corndog                      | 122             | 1               | DNA          | 4                  |
| Virus | Mycobacterium phage CrimD                        | 95              | 1               | DNA          | 4                  |
| Virus | Mycobacterium phage D29                          | 79              | 1               | DNA          | 4                  |
| Virus | Mycobacterium phage DD5                          | 87              | 1               | DNA          | 4                  |
| Virus | Mycobacterium phage ET08                         | 218             | 1               | DNA          | 4                  |
| Virus | Mycobacterium phage Faith1                       | 129             | 1               | DNA          | 4                  |
| Virus | Mycobacterium phage Fruitloop                    | 102             | 1               | DNA          | 4                  |
| Virus | Mycobacterium phage Giles                        | 78              | 1               | DNA          | 4                  |
| Virus | Mycobacterium phage Gumball                      | 88              | 1               | DNA          | 4                  |
| Virus | Mycobacterium phage Halo                         | 65              | 1               | DNA          | 4                  |
| Virus | Mycobacterium phage Jasper                       | 94              | 1               | DNA          | 4                  |
| Virus | Mycobacterium phage KBG                          | 89              | 1               | DNA          | 4                  |
| Virus | Mycobacterium phage Konstantine                  | 95              | 1               | DNA          | 4                  |
| Virus | Mycobacterium phage Kostya                       | 143             | 1               | DNA          | 4                  |
| Virus | Mycobacterium phage L5                           | 85              | 1               | DNA          | 4                  |
| Virus | Mycobacterium phage LeBron                       | 123             | 1               | DNA          | 4                  |
| Virus | Mycobacterium phage Llij                         | 100             | 1               | DNA          | 4                  |
| Virus | Mycobacterium phage Lockley                      | 90              | 1               | DNA          | 4                  |
| Virus | Mycobacterium phage Myrna                        | 229             | 1               | DNA          | 4                  |
| Virus | Mycobacterium phage Nigel                        | 94              | 1               | DNA          | 4                  |
| Virus | Mycobacterium phage Omega                        | 237             | 1               | DNA          | 4                  |
| Virus | Mycobacterium phage Orion                        | 100             | 1               | DNA          | 4                  |
| Virus | Mycobacterium phage Pacc40                       | 101             | 1               | DNA          | 4                  |
| Virus | Mycobacterium phage PBI1                         | 81              | 1               | DNA          | 4                  |
| Virus | Mycobacterium phage Peaches                      | 86              | 1               | DNA          | 4                  |
| Virus | Mycobacterium phage PG1                          | 100             | 1               | DNA          | 4                  |
| Virus | Mycobacterium phage Phaedrus                     | 98              | 1               | DNA          | 4                  |
| Virus | Mycobacterium phage Phlyer                       | 105             | 1               | DNA          | 4                  |
| Virus | Mycobacterium phage Pipefish                     | 102             | 1               | DNA          | 4                  |
| Virus | Mycobacterium phage PLOt                         | 89              | 1               | DNA          | 4                  |
| Virus | Mycobacterium phage PMC                          | 104             | 1               | DNA          | 4                  |

| Type  | Name                                         | Number of genes | Baltimore class | Nucleic Acid | Monophyletic group |
|-------|----------------------------------------------|-----------------|-----------------|--------------|--------------------|
| Virus | Mycobacterium phage Porky                    | 147             | 1               | DNA          | 4                  |
| Virus | Mycobacterium phage Predator                 | 92              | 1               | DNA          | 4                  |
| Virus | Mycobacterium phage Pukovnik                 | 88              | 1               | DNA          | 4                  |
| Virus | Mycobacterium phage Qyrzula                  | 81              | 1               | DNA          | 4                  |
| Virus | Mycobacterium phage Ramsey                   | 108             | 1               | DNA          | 4                  |
| Virus | Mycobacterium phage Rizal                    | 220             | 1               | DNA          | 4                  |
| Virus | Mycobacterium phage Rosebush                 | 90              | 1               | DNA          | 4                  |
| Virus | Mycobacterium phage ScottMcG                 | 221             | 1               | DNA          | 4                  |
| Virus | Mycobacterium phage Solon                    | 86              | 1               | DNA          | 4                  |
| Virus | Mycobacterium phage Spud                     | 222             | 1               | DNA          | 4                  |
| Virus | Mycobacterium phage SWU1                     | 94              | 1               | DNA          | 4                  |
| Virus | Mycobacterium phage TM4                      | 89              | 1               | DNA          | 4                  |
| Virus | Mycobacterium phage Troll4                   | 84              | 1               | DNA          | 4                  |
| Virus | Mycobacterium phage Tweety                   | 109             | 1               | DNA          | 4                  |
| Virus | Mycobacterium phage U2                       | 81              | 1               | DNA          | 4                  |
| Virus | Mycobacterium phage Wee                      | 108             | 1               | DNA          | 4                  |
| Virus | Mycobacterium phage Wildcat                  | 148             | 1               | DNA          | 4                  |
| Virus | Mycoplasma phage MAV1                        | 15              | 1               | DNA          | NA                 |
| Virus | Mycoplasma phage P1                          | 11              | 1               | DNA          | 4                  |
| Virus | Mycoplasma phage phiMFV1                     | 15              | NA              | DNA          | NA                 |
| Virus | Mycoreovirus 1                               | 11              | 3               | RNA          | NA                 |
| Virus | Mycoreovirus 3                               | 12              | 3               | RNA          | NA                 |
| Virus | Mycovirus FusoV                              | 2               | 3               | RNA          | 1                  |
| Virus | Myotis polyomavirus VM-2008                  | 6               | 1               | DNA          | 3                  |
| Virus | Mythimna loreyi densovirus                   | 7               | 2               | DNA          | 3                  |
| Virus | Myxococcus phage Mx8                         | 86              | 1               | DNA          | 4                  |
| Virus | Myxoma virus                                 | 170             | 1               | DNA          | 5                  |
| Virus | Myzus persicae densovirus                    | 5               | 2               | DNA          | 3                  |
| Virus | Nam Dinh virus                               | 6               | 4               | RNA          | NA                 |
| Virus | Nanovirus-like particle                      | 1               | 2               | DNA          | NA                 |
| Virus | Narcissus common latent virus                | 6               | 4               | RNA          | 1                  |
| Virus | Narcissus degeneration virus                 | 12              | 4               | RNA          | 1                  |
| Virus | Narcissus mosaic virus                       | 6               | 4               | RNA          | 1                  |
| Virus | Narcissus symptomless virus                  | 6               | 4               | RNA          | 1                  |
| Virus | Narcissus yellow stripe virus                | 12              | 4               | RNA          | 1                  |
| Virus | Nariva virus                                 | 8               | 5               | RNA          | NA                 |
| Virus | Natrialba phage PhiCh1                       | 98              | 1               | DNA          | 4                  |
| Virus | Ndumu virus                                  | 4               | 4               | RNA          | 1                  |
| Virus | Nemesia ring necrosis virus                  | 3               | 4               | RNA          | 1                  |
| Virus | Neodiprion abietis NPV                       | 93              | 1               | DNA          | NA                 |
| Virus | Neodiprion lecontei NPV                      | 89              | 1               | DNA          | NA                 |
| Virus | Neodiprion sertifer NPV                      | 90              | 1               | DNA          | NA                 |
| Virus | Nerine virus X                               | 5               | 4               | RNA          | 1                  |
| Virus | Newbury agent 1                              | 4               | 4               | RNA          | 1                  |
| Virus | Newcastle disease virus B1                   | 6               | 5               | RNA          | NA                 |
| Virus | Ngainingan virus                             | 15              | 5               | RNA          | NA                 |
| Virus | Night-heron coronavirus HKU19                | 8               | 4               | RNA          | NA                 |
| Virus | Nilaparvata lugens reovirus                  | 11              | 3               | RNA          | NA                 |
| Virus | Nipah virus                                  | 8               | 5               | RNA          | NA                 |
| Virus | Nocardia phage NBR1                          | 68              | 1               | DNA          | 4                  |
| Virus | Nodamura virus                               | 5               | 4               | RNA          | 1                  |
| Virus | Nootka lupine vein clearing virus            | 5               | 4               | RNA          | 1                  |
| Virus | Nora virus                                   | 7               | 4               | RNA          | NA                 |
| Virus | Northern cereal mosaic virus                 | 9               | 5               | RNA          | NA                 |
| Virus | Norwalk virus                                | 9               | 4               | RNA          | 1                  |
| Virus | Ntaya virus                                  | 1               | 4               | RNA          | 1                  |
| Virus | Nudaurelia capensis beta virus               | 2               | 4               | RNA          | 1                  |
| Virus | Nyamanini virus                              | 6               | 5               | RNA          | NA                 |
| Virus | O'nyong-nyong virus                          | 13              | 4               | RNA          | 1                  |
| Virus | oat blue dwarf virus                         | 3               | 4               | RNA          | 1                  |
| Virus | Oat blue dwarf virus                         | 2               | 4               | RNA          | 1                  |
| Virus | Oat chlorotic stunt virus                    | 4               | 4               | RNA          | 1                  |
| Virus | Oat dwarf virus                              | 4               | 2               | DNA          | 3                  |
| Virus | Oat golden stripe virus                      | 6               | 4               | RNA          | 1                  |
| Virus | Oat mosaic virus                             | 13              | 4               | RNA          | 1                  |
| Virus | Oat necrotic mottle virus                    | 12              | 4               | RNA          | 1                  |
| Virus | Obodhiang virus                              | 9               | 5               | RNA          | NA                 |
| Virus | Obuda pepper virus                           | 4               | 4               | RNA          | 1                  |
| Virus | Odontoglossum ringspot virus                 | 5               | 4               | RNA          | 1                  |
| Virus | Okra leaf curl alphasatellite                | 1               | 2               | DNA          | NA                 |
| Virus | Okra leaf curl Cameroon virus                | 6               | 2               | DNA          | 3                  |
| Virus | Okra leaf curl Mali virus satellite DNA beta | 1               | 2               | DNA          | 3                  |
| Virus | Okra leaf curl virus                         | 6               | 2               | DNA          | 3                  |
| Virus | Okra leaf curl virus satellite DNA beta      | 1               | NA              | NA           | NA                 |
| Virus | Okra mosaic virus                            | 3               | 4               | RNA          | 1                  |
| Virus | Okra mottle virus                            | 6               | 2               | DNA          | 3                  |
| Virus | Okra yellow crinkle virus                    | 6               | 2               | DNA          | 3                  |
| Virus | Okra yellow mosaic Mexico virus              | 7               | 2               | DNA          | 3                  |
| Virus | Okra yellow vein disease associated sequence | 1               | 2               | DNA          | NA                 |
| Virus | Okra yellow vein mosaic virus                | 6               | 2               | DNA          | 3                  |

| Type  | Name                                                    | Number of genes | Baltimore class | Nucleic Acid | Monophyletic group |
|-------|---------------------------------------------------------|-----------------|-----------------|--------------|--------------------|
| Virus | Olive latent virus 1                                    | 5               | 4               | RNA          | 1                  |
| Virus | Olive latent virus 2                                    | 4               | 4               | RNA          | 1                  |
| Virus | Olive latent virus 3                                    | 4               | 4               | RNA          | 1                  |
| Virus | Olive mild mosaic virus                                 | 6               | 4               | RNA          | 1                  |
| Virus | Oliveros virus                                          | 4               | 5               | RNA          | NA                 |
| Virus | Omikronpapillomavirus 1                                 | 8               | 1               | DNA          | 3                  |
| Virus | Omsk hemorrhagic fever virus                            | 1               | 4               | RNA          | 1                  |
| Virus | Onion yellow dwarf virus                                | 12              | 4               | RNA          | 1                  |
| Virus | Ononis yellow mosaic virus                              | 3               | 4               | RNA          | 1                  |
| Virus | Operophtera brumata reovirus                            | 10              | 3               | RNA          | NA                 |
| Virus | Ophiostoma mitovirus 3a                                 | 1               | 4               | RNA          | 1                  |
| Virus | Ophiostoma mitovirus 4                                  | 1               | 4               | RNA          | 1                  |
| Virus | Ophiostoma mitovirus 5                                  | 1               | 4               | RNA          | 1                  |
| Virus | Ophiostoma mitovirus 6                                  | 1               | 4               | RNA          | 1                  |
| Virus | Opuntia virus X                                         | 5               | 4               | RNA          | 1                  |
| Virus | Orangutan polyomavirus                                  | 5               | 1               | DNA          | 3                  |
| Virus | Orchid fleck virus                                      | 6               | 5               | RNA          | NA                 |
| Virus | Orf virus                                               | 130             | 1               | DNA          | 5                  |
| Virus | Organic Lake phycodnavirus isolate OLPV-scf718000030512 | 48              | 1               | DNA          | 5                  |
| Virus | Organic Lake phycodnavirus isolate OLPV-scf718000030567 | 31              | 1               | DNA          | 5                  |
| Virus | Organic Lake phycodnavirus isolate OLPV-scf718000031019 | 26              | 1               | DNA          | 5                  |
| Virus | Organic Lake phycodnavirus isolate OLPV-scf718000031023 | 38              | 1               | DNA          | 5                  |
| Virus | Organic Lake phycodnavirus isolate OLPV-scf718000031026 | 38              | 1               | DNA          | 5                  |
| Virus | Organic_Lake_phycodnavirus_1                            | 401             | 1               | DNA          | 5                  |
| Virus | Organic_Lake_phycodnavirus_2                            | 326             | 1               | DNA          | 5                  |
| Virus | Organic_Lake_virophage                                  | 24              | 1               | DNA          | Unconsidered       |
| Virus | Orgyia leucostigma NPV                                  | 135             | 1               | DNA          | NA                 |
| Virus | Orgyia pseudotsugata MNPV                               | 152             | 1               | DNA          | NA                 |
| Virus | Ornithogalum mosaic virus                               | 11              | 4               | RNA          | 1                  |
| Virus | Oropouche virus                                         | 4               | 5               | RNA          | NA                 |
| Virus | Oryctes rhinoceros virus                                | 139             | 1               | DNA          | NA                 |
| Virus | Oryza rufipogon endornavirus                            | 1               | 3               | RNA          | NA                 |
| Virus | Oryza sativa endornavirus                               | 1               | 3               | RNA          | NA                 |
| Virus | Ostreid herpesvirus 1                                   | 127             | 1               | DNA          | NA                 |
| Virus | Ostreococcus lucimarinus virus OIV1                     | 250             | 1               | DNA          | 5                  |
| Virus | Ostreococcus tauri virus 1                              | 230             | 1               | DNA          | 5                  |
| Virus | Ostreococcus tauri virus 2                              | 237             | 1               | DNA          | 5                  |
| Virus | Ostreococcus virus OsV5                                 | 264             | 1               | DNA          | 5                  |
| Virus | Ourmia melon virus                                      | 3               | 4               | RNA          | 1                  |
| Virus | Ovine adenovirus A                                      | 41              | 1               | DNA          | NA                 |
| Virus | Ovine adenovirus D                                      | 32              | 1               | DNA          | NA                 |
| Virus | Ovine enzootic nasal tumour virus                       | 6               | 6               | RNA          | NA                 |
| Virus | Ovine herpesvirus 2                                     | 73              | 1               | DNA          | NA                 |
| Virus | Ovine lentivirus                                        | 8               | 6               | RNA          | 2                  |
| Virus | Ovine papillomavirus - 1                                | 5               | 1               | DNA          | 3                  |
| Virus | Oyster mushroom spherical virus                         | 7               | 4               | RNA          | NA                 |
| Virus | Palyam virus                                            | 11              | 3               | RNA          | NA                 |
| Virus | Panax virus Y                                           | 12              | 4               | RNA          | 1                  |
| Virus | Panicum mosaic satellite virus                          | 2               | NA              | RNA          | NA                 |
| Virus | Panicum mosaic virus                                    | 6               | 4               | RNA          | 1                  |
| Virus | Panicum streak virus                                    | 4               | 2               | DNA          | 3                  |
| Virus | Panine herpesvirus 2                                    | 169             | 1               | DNA          | NA                 |
| Virus | Pantoea phage LIMEzero                                  | 57              | 1               | DNA          | 4                  |
| Virus | Papaya leaf curl China virus                            | 6               | 2               | DNA          | 3                  |
| Virus | Papaya leaf curl China virus satellite DNA beta         | 1               | 2               | DNA          | 3                  |
| Virus | Papaya leaf curl Guandong virus                         | 6               | 2               | DNA          | 3                  |
| Virus | Papaya leaf curl virus                                  | 7               | 2               | DNA          | 3                  |
| Virus | Papaya leaf curl virus-associated DNA beta              | 1               | 2               | DNA          | 3                  |
| Virus | Papaya leaf distortion mosaic virus                     | 12              | 4               | RNA          | 1                  |
| Virus | Papaya lethal yellowing virus                           | 4               | 4               | RNA          | NA                 |
| Virus | Papaya mosaic virus                                     | 5               | 4               | RNA          | 1                  |
| Virus | Papaya ringspot virus                                   | 12              | 4               | RNA          | 1                  |
| Virus | Papiine herpesvirus 2                                   | 75              | 1               | DNA          | NA                 |
| Virus | Papilio polyxenes densovirus                            | 3               | 2               | DNA          | 3                  |
| Virus | Papio hamadryas papillomavirus type 1                   | 8               | 1               | DNA          | 3                  |
| Virus | Paprika mild mottle virus                               | 4               | 4               | RNA          | 1                  |
| Virus | Parainfluenza virus 5                                   | 8               | 5               | RNA          | NA                 |
| Virus | Paralichthys olivaceus birnavirus                       | 3               | 3               | RNA          | NA                 |
| Virus | Paramecium bursaria Chlorella virus 1                   | 802             | 1               | DNA          | 5                  |
| Virus | Paramecium bursaria Chlorella virus AR158               | 814             | 1               | DNA          | 5                  |
| Virus | Paramecium bursaria Chlorella virus FR483               | 849             | 1               | DNA          | 5                  |
| Virus | Paramecium bursaria Chlorella virus NY2A                | 886             | 1               | DNA          | 5                  |
| Virus | Parana virus                                            | 4               | 5               | RNA          | NA                 |
| Virus | Pariacato virus                                         | 5               | 4               | RNA          | 1                  |
| Virus | Parietaria mottle virus                                 | 5               | 4               | RNA          | 1                  |
| Virus | Parrot hepatitis B virus                                | 5               | 7               | DNA          | 2                  |
| Virus | Parsnip yellow fleck virus                              | 8               | 4               | RNA          | 1                  |
| Virus | Parvovirus H1                                           | 3               | 2               | DNA          | 3                  |
| Virus | Paspalum dilatatum striate mosaic virus                 | 4               | 2               | DNA          | 3                  |
| Virus | Paspalum striate mosaic virus                           | 4               | 2               | DNA          | 3                  |

| Type  | Name                                             | Number of genes | Baltimore class | Nucleic Acid | Monophyletic group |
|-------|--------------------------------------------------|-----------------|-----------------|--------------|--------------------|
| Virus | Passiflora latent carlavirus                     | 6               | 4               | RNA          | 1                  |
| Virus | Passion fruit mosaic virus                       | 4               | 4               | RNA          | 1                  |
| Virus | Passion fruit woodiness virus                    | 12              | 4               | RNA          | 1                  |
| Virus | Passionfruit severe leaf distortion virus        | 7               | 2               | DNA          | 3                  |
| Virus | Pasteurella phage F108                           | 44              | 1               | DNA          | 4                  |
| Virus | Patchouli mild mosaic virus                      | 10              | 4               | RNA          | 1                  |
| Virus | Pea early-browning virus                         | 7               | 4               | RNA          | 1                  |
| Virus | Pea enation mosaic virus-1                       | 5               | 4               | RNA          | 1                  |
| Virus | Pea enation mosaic virus-2                       | 4               | 4               | RNA          | 1                  |
| Virus | Pea seed-borne mosaic virus                      | 12              | 4               | RNA          | 1                  |
| Virus | Pea stem necrosis virus                          | 5               | 4               | RNA          | 1                  |
| Virus | Peach chlorotic mottle virus                     | 5               | 4               | RNA          | 1                  |
| Virus | Peach mosaic virus                               | 4               | 4               | RNA          | 1                  |
| Virus | Peanut chlorotic streak virus                    | 4               | 7               | DNA          | 2                  |
| Virus | Peanut clump virus                               | 8               | 4               | RNA          | 1                  |
| Virus | Peanut mottle virus                              | 12              | 4               | RNA          | 1                  |
| Virus | Peanut stunt virus                               | 5               | 4               | RNA          | 1                  |
| Virus | Pear latent virus                                | 5               | 4               | RNA          | 1                  |
| Virus | Pectobacterium phage My1                         | 149             | 1               | DNA          | 4                  |
| Virus | Pedilanthus leaf curl virus                      | 6               | 2               | DNA          | 3                  |
| Virus | Pediococcus phage cIP1                           | 57              | 1               | DNA          | 4                  |
| Virus | Pelargonium chlorotic ring pattern virus         | 6               | 4               | RNA          | 1                  |
| Virus | Pelargonium flower break virus                   | 6               | 4               | RNA          | 1                  |
| Virus | Pelargonium line pattern virus                   | 7               | 4               | RNA          | 1                  |
| Virus | Pelargonium necrotic spot virus                  | 5               | 4               | RNA          | 1                  |
| Virus | Pelargonium vein banding virus                   | 3               | 7               | DNA          | 2                  |
| Virus | Pelargonium zonate spot virus                    | 4               | 4               | RNA          | 1                  |
| Virus | Penaeid shrimp infectious myonecrosis virus      | 2               | 3               | RNA          | NA                 |
| Virus | Penaeus merguensis densovirus                    | 3               | 2               | DNA          | 3                  |
| Virus | Penaeus monodon hepatopancreatic parvovirus      | 3               | 2               | DNA          | 3                  |
| Virus | Penaeus vannamei nodavirus                       | 3               | 4               | RNA          | NA                 |
| Virus | Penicillium chrysogenum virus                    | 4               | 3               | RNA          | NA                 |
| Virus | Penicillium stoloniferum virus F                 | 2               | 3               | RNA          | 1                  |
| Virus | Penicillium stoloniferum virus S                 | 2               | 3               | RNA          | 1                  |
| Virus | Pennisetum mosaic virus                          | 12              | 4               | RNA          | 1                  |
| Virus | Pepino mosaic virus                              | 5               | 4               | RNA          | 1                  |
| Virus | Pepper curly top virus                           | 7               | 2               | DNA          | 3                  |
| Virus | Pepper golden mosaic virus                       | 6               | 2               | DNA          | 3                  |
| Virus | Pepper huasteco yellow vein virus                | 7               | 2               | DNA          | 3                  |
| Virus | Pepper leaf curl Bangladesh virus                | 6               | 2               | DNA          | 3                  |
| Virus | Pepper leaf curl virus                           | 6               | 2               | DNA          | 3                  |
| Virus | Pepper leaf curl virus satellite DNA beta        | 1               | 2               | DNA          | 3                  |
| Virus | Pepper leaf curl Yunnan virus satellite DNA beta | 1               | 2               | DNA          | 3                  |
| Virus | Pepper mild mottle virus                         | 4               | 4               | RNA          | 1                  |
| Virus | Pepper mottle virus                              | 12              | 4               | RNA          | 1                  |
| Virus | Pepper ringspot virus                            | 5               | 4               | RNA          | 1                  |
| Virus | Pepper severe mosaic virus                       | 12              | 4               | RNA          | 1                  |
| Virus | Pepper vein yellows virus                        | 6               | 4               | RNA          | 1                  |
| Virus | Pepper veinal mottle virus                       | 12              | 4               | RNA          | 1                  |
| Virus | Pepper yellow dwarf virus - New Mexico           | 7               | 2               | DNA          | 3                  |
| Virus | Pepper yellow leaf curl Indonesia virus          | 7               | 2               | DNA          | 3                  |
| Virus | Pepper yellow mosaic virus                       | 12              | 4               | RNA          | 1                  |
| Virus | Pepper yellow vein Mali virus                    | 6               | 2               | DNA          | 3                  |
| Virus | Perina nuda virus                                | 1               | 4               | RNA          | 1                  |
| Virus | Periplaneta fuliginosa densovirus                | 8               | 2               | DNA          | 3                  |
| Virus | Peristrophe mosaic virus                         | 2               | 2               | DNA          | 3                  |
| Virus | Persea americana endornavirus                    | 1               | 3               | RNA          | NA                 |
| Virus | Persicivirga phage P12024L                       | 58              | 1               | DNA          | NA                 |
| Virus | Persicivirga phage P12024S                       | 59              | 1               | DNA          | NA                 |
| Virus | Persimmon cryptic virus                          | 2               | 3               | RNA          | 1                  |
| Virus | Peru tomato mosaic virus                         | 11              | 4               | RNA          | 1                  |
| Virus | Peruvian horse sickness virus                    | 11              | 3               | RNA          | NA                 |
| Virus | Peste-des-petits-ruminants virus                 | 8               | 5               | RNA          | NA                 |
| Virus | Pestivirus Giraffe-1                             | 14              | 4               | RNA          | 1                  |
| Virus | Pestivirus strain Aydin/04-TR                    | 1               | 4               | RNA          | 1                  |
| Virus | Petunia vein clearing virus                      | 1               | 7               | DNA          | 2                  |
| Virus | Phage BP-4795                                    | 85              | 1               | DNA          | 4                  |
| Virus | Phage cdtI                                       | 60              | 1               | DNA          | 4                  |
| Virus | Phage Gifsy-1                                    | 58              | NA              | NA           | NA                 |
| Virus | Phage Gifsy-2                                    | 55              | NA              | NA           | NA                 |
| Virus | Phage MP22                                       | 51              | 1               | DNA          | 4                  |
| Virus | Phage phiJL001                                   | 90              | 1               | DNA          | 4                  |
| Virus | Phage phiSMA9                                    | 7               | NA              | DNA          | NA                 |
| Virus | Phaius virus X                                   | 5               | 4               | RNA          | 1                  |
| Virus | Phlebiopsis gigantea mycovirus dsRNA 1           | 2               | 3               | RNA          | NA                 |
| Virus | Phlox Virus B                                    | 6               | 4               | RNA          | 1                  |
| Virus | Phlox virus S                                    | 6               | 4               | RNA          | 1                  |
| Virus | Phocoena phocoena papillomavirus 1               | 6               | 1               | DNA          | 3                  |
| Virus | Phocoena phocoena papillomavirus 2               | 6               | 1               | DNA          | 3                  |
| Virus | Phocoena phocoena papillomavirus 4               | 6               | 1               | DNA          | 3                  |

| Type  | Name                                                          | Number of genes | Baltimore class | Nucleic Acid | Monophyletic group |
|-------|---------------------------------------------------------------|-----------------|-----------------|--------------|--------------------|
| Virus | Phormidium phage Pf-WMP3                                      | 41              | 1               | DNA          | 4                  |
| Virus | Phthorimaea operculella granulovirus                          | 130             | 1               | DNA          | NA                 |
| Virus | Physalis mottle virus                                         | 3               | 4               | RNA          | 1                  |
| Virus | Phytophthora endornavirus 1                                   | 1               | 3               | RNA          | NA                 |
| Virus | Phytophthora infestans RNA virus 1                            | 3               | 4               | RNA          | NA                 |
| Virus | Pichinde virus                                                | 4               | 5               | RNA          | NA                 |
| Virus | Pieris rapae granulovirus                                     | 120             | 1               | DNA          | NA                 |
| Virus | Pig stool associated circular ssDNA virus GER2011             | 5               | 2               | DNA          | NA                 |
| Virus | Pigeon picornavirus B                                         | 13              | 4               | RNA          | 1                  |
| Virus | Pineapple bacilliform comosus virus                           | 3               | 7               | DNA          | 2                  |
| Virus | Pineapple mealybug wilt-associated virus 1                    | 7               | 4               | RNA          | 1                  |
| Virus | Piritral virus                                                | 4               | 5               | RNA          | NA                 |
| Virus | Piscine myocarditis virus AL V-708                            | 3               | 3               | RNA          | NA                 |
| Virus | Planaria asexual strain-specific virus-like element type 1    | 6               | NA              | NA           | NA                 |
| Virus | Planktothrix phage PaV-LD                                     | 142             | 1               | DNA          | 4                  |
| Virus | Planococcus citri densovirus                                  | 4               | 2               | DNA          | 3                  |
| Virus | Plantago asiatica mosaic virus                                | 5               | 4               | RNA          | 1                  |
| Virus | Plantago mottle virus                                         | 3               | 4               | RNA          | 1                  |
| Virus | Plautia stali intestine virus                                 | 2               | 4               | RNA          | 1                  |
| Virus | Pleurotus ostreatus virus 1                                   | 2               | 3               | RNA          | 1                  |
| Virus | Plum bark necrosis and stem pitting-associated virus          | 7               | 4               | RNA          | 1                  |
| Virus | Plum pox virus                                                | 12              | 4               | RNA          | 1                  |
| Virus | Plutella xylostella granulovirus                              | 120             | 1               | DNA          | NA                 |
| Virus | Plutella xylostella multiple nucleopolyhedrovirus             | 152             | 1               | DNA          | NA                 |
| Virus | Pneumonia virus of mice J3666                                 | 12              | 5               | RNA          | NA                 |
| Virus | Poinsettia cryptic virus                                      | 4               | 4               | RNA          | 1                  |
| Virus | Poinsettia mosaic virus                                       | 5               | 4               | RNA          | 1                  |
| Virus | Pokeweed mosaic virus                                         | 1               | 4               | RNA          | 1                  |
| Virus | Poliovirus                                                    | 12              | 4               | RNA          | 1                  |
| Virus | Polyomavirus HPyV6                                            | 5               | 1               | DNA          | 3                  |
| Virus | Polyomavirus HPyV7                                            | 5               | 1               | DNA          | 3                  |
| Virus | Poplar mosaic virus                                           | 6               | 4               | RNA          | 1                  |
| Virus | Porcine adenovirus A                                          | 29              | 1               | DNA          | NA                 |
| Virus | Porcine adenovirus C                                          | 58              | 1               | DNA          | NA                 |
| Virus | Porcine associated stool circular virus                       | 2               | 2               | DNA          | NA                 |
| Virus | Porcine bocavirus 3                                           | 4               | 2               | DNA          | 3                  |
| Virus | Porcine bocavirus 4-1                                         | 4               | 2               | DNA          | 3                  |
| Virus | Porcine bocavirus 5/JS677                                     | 4               | 2               | DNA          | 3                  |
| Virus | Porcine circovirus 1                                          | 2               | 2               | DNA          | 3                  |
| Virus | Porcine circovirus 2                                          | 3               | 2               | DNA          | 3                  |
| Virus | Porcine circovirus type 1/2a                                  | 2               | 2               | DNA          | 3                  |
| Virus | Porcine coronavirus HKU15                                     | 7               | 4               | RNA          | NA                 |
| Virus | Porcine enteric sapovirus                                     | 2               | 4               | RNA          | 1                  |
| Virus | Porcine enterovirus B                                         | 12              | 4               | RNA          | 1                  |
| Virus | Porcine epidemic diarrhea virus                               | 19              | 4               | RNA          | NA                 |
| Virus | Porcine hemagglutinating encephalomyelitis virus              | 10              | 4               | RNA          | NA                 |
| Virus | Porcine kobuvirus SH-W-CHN/2010/China                         | 1               | 4               | RNA          | 1                  |
| Virus | Porcine kobuvirus swine/S-1-HUN/2007/Hungary                  | 12              | 4               | RNA          | 1                  |
| Virus | Porcine parvovirus                                            | 6               | 2               | DNA          | 3                  |
| Virus | Porcine parvovirus 4                                          | 3               | 2               | DNA          | 3                  |
| Virus | Porcine reproductive and respiratory syndrome virus           | 24              | 4               | RNA          | NA                 |
| Virus | Porcine rubulavirus                                           | 9               | 5               | RNA          | NA                 |
| Virus | Porcine sapelovirus 1                                         | 12              | 4               | RNA          | 1                  |
| Virus | Porcine teschovirus                                           | 13              | 4               | RNA          | 1                  |
| Virus | Potato apical leaf curl disease-associated satellite DNA beta | 1               | 2               | DNA          | 3                  |
| Virus | Potato aucuba mosaic virus                                    | 6               | 4               | RNA          | 1                  |
| Virus | Potato latent virus                                           | 6               | 4               | RNA          | 1                  |
| Virus | Potato leafroll virus                                         | 7               | 4               | RNA          | 1                  |
| Virus | Potato mop-top virus                                          | 8               | 4               | RNA          | 1                  |
| Virus | Potato virus A                                                | 12              | 4               | RNA          | 1                  |
| Virus | Potato virus H                                                | 6               | 4               | RNA          | NA                 |
| Virus | Potato virus M                                                | 8               | 4               | RNA          | 1                  |
| Virus | Potato Virus P                                                | 6               | 4               | RNA          | 1                  |
| Virus | Potato virus S                                                | 7               | 4               | RNA          | 1                  |
| Virus | Potato virus T                                                | 3               | 4               | RNA          | 1                  |
| Virus | Potato virus V                                                | 12              | 4               | RNA          | 1                  |
| Virus | Potato virus X                                                | 5               | 4               | RNA          | 1                  |
| Virus | Potato virus Y                                                | 12              | 4               | RNA          | 1                  |
| Virus | Potato yellow dwarf virus                                     | 7               | 5               | RNA          | NA                 |
| Virus | Potato yellow mosaic Panama virus                             | 7               | 2               | DNA          | 3                  |
| Virus | Potato yellow mosaic Trinidad virus                           | 7               | 2               | DNA          | 3                  |
| Virus | Potato yellow mosaic virus                                    | 6               | 2               | DNA          | 3                  |
| Virus | Potato yellow vein virus                                      | 13              | 4               | RNA          | 1                  |
| Virus | Pothos latent virus                                           | 5               | 4               | RNA          | 1                  |
| Virus | Powassan virus                                                | 14              | 4               | RNA          | 1                  |
| Virus | PreXMRV-1                                                     | 2               | 6               | RNA          | 2                  |
| Virus | Primula malacoides virus China/Mar2007                        | 2               | 3               | RNA          | 1                  |
| Virus | Prochlorococcus phage P-HM1                                   | 241             | 1               | DNA          | 4                  |
| Virus | Prochlorococcus phage P-HM2                                   | 242             | 1               | DNA          | 4                  |
| Virus | Prochlorococcus phage P-RSM4                                  | 239             | 1               | DNA          | 4                  |



| Type  | Name                                 | Number of genes | Baltimore class | Nucleic Acid | Monophyletic group |
|-------|--------------------------------------|-----------------|-----------------|--------------|--------------------|
| Virus | Prochlorococcus phage P-SSM2         | 334             | 1               | DNA          | 4                  |
| Virus | Prochlorococcus phage P-SSM4         | 221             | 1               | DNA          | 4                  |
| Virus | Prochlorococcus phage P-SSM7         | 237             | 1               | DNA          | 4                  |
| Virus | Prochlorococcus phage P-SSP7         | 58              | 1               | DNA          | 4                  |
| Virus | Prochlorococcus phage Syn1           | 234             | 1               | DNA          | NA                 |
| Virus | Prochlorococcus phage Syn33          | 227             | 1               | DNA          | NA                 |
| Virus | Procyon lotor papillomavirus 1       | 7               | 1               | DNA          | 3                  |
| Virus | Propionibacterium phage ATCC29399B_C | 46              | 1               | DNA          | 4                  |
| Virus | Propionibacterium phage ATCC29399B_T | 46              | 1               | DNA          | 4                  |
| Virus | Propionibacterium phage B5           | 10              | 2               | DNA          | NA                 |
| Virus | Propionibacterium phage P1.1         | 45              | 1               | DNA          | 4                  |
| Virus | Propionibacterium phage P100_1       | 47              | 1               | DNA          | 4                  |
| Virus | Propionibacterium phage P100_A       | 45              | 1               | DNA          | 4                  |
| Virus | Propionibacterium phage P100D        | 47              | 1               | DNA          | 4                  |
| Virus | Propionibacterium phage P101A        | 47              | 1               | DNA          | 4                  |
| Virus | Propionibacterium phage P104A        | 45              | 1               | DNA          | 4                  |
| Virus | Propionibacterium phage P105         | 45              | 1               | DNA          | 4                  |
| Virus | Propionibacterium phage P14.4        | 47              | 1               | DNA          | 4                  |
| Virus | Propionibacterium phage P9.1         | 45              | 1               | DNA          | 4                  |
| Virus | Propionibacterium phage PA6          | 48              | 1               | DNA          | 4                  |
| Virus | Propionibacterium phage PAD20        | 45              | 1               | DNA          | 4                  |
| Virus | Propionibacterium phage PAS50        | 46              | 1               | DNA          | 4                  |
| Virus | Providence virus                     | 4               | 4               | RNA          | 1                  |
| Virus | Providencia phage Redjac             | 41              | 1               | DNA          | NA                 |
| Virus | Prune dwarf virus                    | 4               | 4               | RNA          | 1                  |
| Virus | Prunus necrotic ringspot virus       | 4               | 4               | RNA          | 1                  |
| Virus | Pseudaletia unipuncta granulovirus   | 183             | 1               | DNA          | NA                 |
| Virus | Pseudoalteromonas phage H105/1       | 52              | 1               | DNA          | 4                  |
| Virus | Pseudoalteromonas phage PM2          | 22              | 1               | DNA          | NA                 |
| Virus | Pseudocowpox virus                   | 134             | 1               | DNA          | 5                  |
| Virus | Pseudomonas phage 119X               | 53              | 1               | DNA          | 4                  |
| Virus | Pseudomonas phage 14-1               | 90              | 1               | DNA          | 4                  |
| Virus | Pseudomonas phage 201phi2-1          | 461             | 1               | DNA          | 4                  |
| Virus | Pseudomonas phage 73                 | 52              | 1               | DNA          | 4                  |
| Virus | Pseudomonas phage B3                 | 59              | 1               | DNA          | 4                  |
| Virus | Pseudomonas phage Bf7                | 46              | 1               | DNA          | 4                  |
| Virus | Pseudomonas phage D3                 | 95              | 1               | DNA          | 4                  |
| Virus | Pseudomonas phage D3112              | 55              | 1               | DNA          | 4                  |
| Virus | Pseudomonas phage DMS3               | 52              | 1               | DNA          | 4                  |
| Virus | Pseudomonas phage EL                 | 201             | 1               | DNA          | 4                  |
| Virus | Pseudomonas phage F10                | 63              | 1               | DNA          | 4                  |
| Virus | Pseudomonas phage F116               | 70              | 1               | DNA          | 4                  |
| Virus | Pseudomonas phage F8                 | 91              | 1               | DNA          | 4                  |
| Virus | Pseudomonas phage gh-1               | 42              | 1               | DNA          | 4                  |
| Virus | Pseudomonas phage KPP10              | 146             | 1               | DNA          | 4                  |
| Virus | Pseudomonas phage LBL3               | 88              | 1               | DNA          | 4                  |
| Virus | Pseudomonas phage LIT1               | 90              | 1               | DNA          | 4                  |
| Virus | Pseudomonas phage LKD16              | 53              | 1               | DNA          | 4                  |
| Virus | Pseudomonas phage LMA2               | 94              | 1               | DNA          | 4                  |
| Virus | Pseudomonas phage Lu11               | 391             | 1               | DNA          | 4                  |
| Virus | Pseudomonas phage LUZ19              | 54              | 1               | DNA          | 4                  |
| Virus | Pseudomonas phage LUZ24              | 68              | 1               | DNA          | 4                  |
| Virus | Pseudomonas phage LUZ7               | 115             | 1               | DNA          | 4                  |
| Virus | Pseudomonas phage M6                 | 85              | 1               | DNA          | 4                  |
| Virus | Pseudomonas phage MP1412             | 77              | 1               | DNA          | 4                  |
| Virus | Pseudomonas phage MP29               | 51              | 1               | DNA          | 4                  |
| Virus | Pseudomonas phage MP38               | 51              | 1               | DNA          | 4                  |
| Virus | Pseudomonas phage MP42               | 53              | 1               | DNA          | 4                  |
| Virus | Pseudomonas phage OBP                | 309             | 1               | DNA          | 4                  |
| Virus | Pseudomonas phage PA11               | 70              | 1               | DNA          | NA                 |
| Virus | Pseudomonas phage PAJU2              | 79              | 1               | DNA          | 4                  |
| Virus | Pseudomonas phage PAK_P1             | 158             | 1               | DNA          | 4                  |
| Virus | Pseudomonas phage PaP2               | 58              | 1               | DNA          | 4                  |
| Virus | Pseudomonas phage PaP3               | 71              | 1               | DNA          | 4                  |
| Virus | Pseudomonas phage PB1                | 93              | 1               | DNA          | 4                  |
| Virus | Pseudomonas phage Pf1                | 15              | 2               | DNA          | NA                 |
| Virus | Pseudomonas phage Pf3                | 9               | 2               | DNA          | NA                 |
| Virus | Pseudomonas phage phi-2              | 43              | 1               | DNA          | 4                  |
| Virus | Pseudomonas phage phi12              | 15              | 3               | RNA          | NA                 |
| Virus | Pseudomonas phage phi13              | 13              | 3               | RNA          | NA                 |
| Virus | Pseudomonas phage phi15              | 50              | 1               | DNA          | 4                  |
| Virus | Pseudomonas phage phi2954            | 14              | 3               | RNA          | NA                 |
| Virus | Pseudomonas phage phi297             | 69              | 1               | DNA          | 4                  |
| Virus | Pseudomonas phage phi6               | 13              | 3               | RNA          | NA                 |
| Virus | Pseudomonas phage phi8               | 19              | 3               | RNA          | NA                 |
| Virus | Pseudomonas phage phiCTX             | 47              | 1               | DNA          | 4                  |
| Virus | Pseudomonas phage phiIBB-PF7A        | 52              | 1               | DNA          | 4                  |
| Virus | Pseudomonas phage phiKF77            | 53              | 1               | DNA          | 4                  |
| Virus | Pseudomonas phage phiKMV             | 49              | 1               | DNA          | 4                  |
| Virus | Pseudomonas phage phiKZ              | 306             | 1               | DNA          | 4                  |

| Type  | Name                                        | Number of genes | Baltimore class | Nucleic Acid | Monophyletic group |
|-------|---------------------------------------------|-----------------|-----------------|--------------|--------------------|
| Virus | Pseudomonas phage PP7                       | 4               | 4               | RNA          | 1                  |
| Virus | Pseudomonas phage PRR1                      | 4               | 4               | RNA          | 1                  |
| Virus | Pseudomonas phage PT2                       | 54              | 1               | DNA          | 4                  |
| Virus | Pseudomonas phage PT5                       | 52              | 1               | DNA          | 4                  |
| Virus | Pseudomonas phage SN                        | 92              | 1               | DNA          | 4                  |
| Virus | Pseudomonas phage tf                        | 72              | 1               | DNA          | 4                  |
| Virus | Pseudomonas phage UFV-P2                    | 41              | 1               | DNA          | 4                  |
| Virus | Pseudomonas phage vB_Pae-Kakheti25          | 58              | 1               | DNA          | 4                  |
| Virus | Pseudomonas phage vB_Pae-TbilisiM32         | 51              | 1               | DNA          | 4                  |
| Virus | Pseudomonas phage vB_PaeS_PMG1              | 96              | 1               | DNA          | 4                  |
| Virus | Pseudomonas phage YuA                       | 77              | 1               | DNA          | 4                  |
| Virus | Psittacid herpesvirus 1                     | 77              | 1               | DNA          | NA                 |
| Virus | Pumpkin yellow mosaic Malaysia virus        | 6               | 2               | DNA          | 3                  |
| Virus | Puumala virus                               | 3               | 5               | RNA          | NA                 |
| Virus | Pyrobaculum spherical virus                 | 48              | 1               | DNA          | NA                 |
| Virus | Pyrococcus abyssi virus 1                   | 25              | 1               | DNA          | NA                 |
| Virus | Quail picornavirus QPV1/HUN/2010            | 1               | 4               | RNA          | 1                  |
| Virus | Quang Binh virus                            | 3               | 4               | RNA          | 1                  |
| Virus | Rabbit calicivirus Australia 1 MIC-07       | 2               | 4               | RNA          | 1                  |
| Virus | Rabbit coronavirus HKU14                    | 11              | 4               | RNA          | NA                 |
| Virus | Rabbit fibroma virus                        | 165             | 1               | DNA          | 5                  |
| Virus | Rabbit hemorrhagic disease virus            | 10              | 4               | RNA          | 1                  |
| Virus | Rabbit vesivirus                            | 3               | 4               | RNA          | 1                  |
| Virus | Rabies virus                                | 5               | 5               | RNA          | NA                 |
| Virus | Rachiplusia ou MNPV                         | 149             | 1               | DNA          | NA                 |
| Virus | Radish leaf curl betasatellite              | 1               | 2               | DNA          | NA                 |
| Virus | Radish leaf curl virus                      | 7               | 2               | DNA          | 3                  |
| Virus | Radish mosaic virus                         | 2               | 4               | RNA          | 1                  |
| Virus | Ralstonia phage p12J                        | 9               | 2               | DNA          | NA                 |
| Virus | Ralstonia phage PE226                       | 9               | 2               | DNA          | NA                 |
| Virus | Ralstonia phage phiRSA1                     | 51              | 1               | DNA          | 4                  |
| Virus | Ralstonia phage RSB1                        | 47              | 1               | DNA          | 4                  |
| Virus | Ralstonia phage RSL1                        | 343             | 1               | DNA          | 4                  |
| Virus | Ralstonia phage RSM1                        | 15              | 2               | DNA          | NA                 |
| Virus | Ralstonia phage RSM3                        | 14              | 2               | DNA          | NA                 |
| Virus | Ralstonia phage RSS1                        | 12              | 2               | DNA          | NA                 |
| Virus | Ramie mosaic virus                          | 8               | 2               | DNA          | 3                  |
| Virus | Ranid herpesvirus 1                         | 132             | 1               | DNA          | NA                 |
| Virus | Ranid herpesvirus 2                         | 147             | 1               | DNA          | NA                 |
| Virus | Raphanus sativus cryptic virus 1            | 2               | 3               | RNA          | 1                  |
| Virus | Raphanus sativus cryptic virus 2            | 3               | 3               | RNA          | 1                  |
| Virus | Raphanus sativus cryptic virus 3            | 2               | 3               | RNA          | 1                  |
| Virus | Raptor adenovirus A                         | 23              | 1               | DNA          | NA                 |
| Virus | Raspberry bushy dwarf virus                 | 3               | 4               | RNA          | 1                  |
| Virus | Raspberry latent virus                      | 12              | 3               | RNA          | NA                 |
| Virus | Raspberry leaf mottle virus                 | 10              | 4               | RNA          | 1                  |
| Virus | Raspberry ringspot virus                    | 4               | 4               | RNA          | 1                  |
| Virus | Rat coronavirus Parker                      | 10              | 4               | RNA          | NA                 |
| Virus | Rattail cactus necrosis associated virus    | 4               | 4               | RNA          | 1                  |
| Virus | Rattus norvegicus papillomavirus 1 EES-2009 | 6               | 1               | DNA          | 3                  |
| Virus | Rauscher murine leukemia virus              | 3               | 6               | RNA          | 2                  |
| Virus | Raven circovirus                            | 2               | 2               | DNA          | 3                  |
| Virus | RD114 retrovirus                            | 2               | 6               | RNA          | 2                  |
| Virus | Red clover mottle virus                     | 10              | 4               | RNA          | 1                  |
| Virus | Red clover necrotic mosaic virus            | 4               | 4               | RNA          | 1                  |
| Virus | Red clover vein mosaic virus                | 6               | 4               | RNA          | 1                  |
| Virus | Redspotted grouper nervous necrosis virus   | 3               | 4               | RNA          | 1                  |
| Virus | Rehmannia mosaic virus                      | 4               | 4               | RNA          | 1                  |
| Virus | Respiratory syncytial virus                 | 10              | 5               | RNA          | NA                 |
| Virus | Reston ebolavirus                           | 8               | 5               | RNA          | NA                 |
| Virus | Reticuloendotheliosis virus                 | 3               | 6               | RNA          | 2                  |
| Virus | Rhizobium phage 16-3                        | 110             | 1               | DNA          | 4                  |
| Virus | Rhizoctonia solani virus 717                | 2               | 3               | RNA          | 1                  |
| Virus | Rhizosolenia setigera RNA virus 01          | 2               | 4               | RNA          | 1                  |
| Virus | Rhodobacter phage RcapMu                    | 58              | 1               | DNA          | 4                  |
| Virus | Rhodococcus phage REQ1                      | 85              | 1               | DNA          | 4                  |
| Virus | Rhodococcus phage REQ2                      | 82              | 1               | DNA          | 4                  |
| Virus | Rhodococcus phage REQ3                      | 60              | NA              | NA           | NA                 |
| Virus | Rhodococcus phage RER2                      | 66              | 1               | DNA          | 4                  |
| Virus | Rhodococcus phage RGL3                      | 66              | 1               | DNA          | 4                  |
| Virus | Rhodococcus phage RRH1                      | 20              | 1               | DNA          | 4                  |
| Virus | Rhododendron virus A                        | 2               | 3               | RNA          | NA                 |
| Virus | Rhodothermus phage RM378                    | 146             | 1               | DNA          | 4                  |
| Virus | Rhopalosiphum padi virus                    | 2               | 4               | RNA          | 1                  |
| Virus | Rhynchosai mild mosaic virus                | 6               | 2               | DNA          | 3                  |
| Virus | Rhynchosia golden mosaic virus              | 7               | 2               | DNA          | 3                  |
| Virus | Rhynchosia golden mosaic Yucatan virus      | 6               | 2               | DNA          | 3                  |
| Virus | Rhynchosia yellow mosaic India virus        | 8               | 2               | DNA          | 3                  |
| Virus | Ribgrass mosaic virus                       | 4               | 4               | RNA          | 1                  |
| Virus | Rice black streaked dwarf virus             | 13              | 3               | RNA          | NA                 |

| Type  | Name                                        | Number of genes | Baltimore class | Nucleic Acid | Monophyletic group |
|-------|---------------------------------------------|-----------------|-----------------|--------------|--------------------|
| Virus | Rice dwarf virus                            | 13              | 3               | RNA          | NA                 |
| Virus | Rice gall dwarf virus                       | 12              | 3               | RNA          | NA                 |
| Virus | Rice grassy stunt virus                     | 12              | 5               | RNA          | NA                 |
| Virus | Rice ragged stunt virus                     | 13              | 3               | RNA          | NA                 |
| Virus | Rice stripe virus                           | 7               | 4               | RNA          | 1                  |
| Virus | Rice tungro bacilliform virus               | 4               | 7               | DNA          | 2                  |
| Virus | Rice tungro spherical virus                 | 8               | 4               | RNA          | 1                  |
| Virus | Rice yellow mottle virus                    | 7               | 4               | RNA          | 1                  |
| Virus | Rice yellow stunt virus                     | 7               | 5               | RNA          | NA                 |
| Virus | Rift Valley fever virus                     | 4               | 5               | RNA          | NA                 |
| Virus | Rinderpest virus (strain Kabete O)          | 7               | 5               | RNA          | NA                 |
| Virus | Rio Bravo virus                             | 14              | 4               | RNA          | 1                  |
| Virus | Rodent herpesvirus Peru                     | 82              | 1               | DNA          | NA                 |
| Virus | Rose cryptic virus 1                        | 3               | 3               | RNA          | 1                  |
| Virus | Rose rosette virus                          | 4               | 4               | RNA          | 1                  |
| Virus | Rose spring dwarf-associated virus          | 8               | 4               | RNA          | 1                  |
| Virus | Rose yellow mosaic virus                    | 10              | 4               | RNA          | 1                  |
| Virus | Rosellinia necatrix megabirnavirus 1/W779   | 4               | NA              | RNA          | NA                 |
| Virus | Rosellinia necatrix partitivirus 1-W8       | 2               | 3               | RNA          | 1                  |
| Virus | Rosellinia necatrix quadrivirus 1           | 4               | 3               | RNA          | NA                 |
| Virus | Roseobacter phage RDJL Phi 1                | 87              | 1               | DNA          | 4                  |
| Virus | Roseobacter phage SIO1                      | 34              | 1               | DNA          | 4                  |
| Virus | Roseophage DSS3P2                           | 81              | 1               | DNA          | NA                 |
| Virus | Roseophage EE36P1                           | 79              | 1               | DNA          | NA                 |
| Virus | Ross River virus                            | 13              | 4               | RNA          | 1                  |
| Virus | Ross's goose hepatitis B virus              | 3               | 7               | DNA          | 2                  |
| Virus | Rotavirus A                                 | 12              | 3               | RNA          | NA                 |
| Virus | Rotavirus C                                 | 11              | 3               | RNA          | NA                 |
| Virus | Rotavirus D chicken/05V0049/DEU/2005        | 12              | 3               | RNA          | NA                 |
| Virus | Rous sarcoma virus                          | 14              | 6               | RNA          | 2                  |
| Virus | Rousettus aegyptiacus papillomavirus type 1 | 7               | 1               | DNA          | 3                  |
| Virus | Rousettus bat coronavirus HKU10             | 9               | 4               | RNA          | NA                 |
| Virus | Rubella virus                               | 7               | 4               | RNA          | 1                  |
| Virus | Rubus canadensis virus 1                    | 5               | 4               | RNA          | NA                 |
| Virus | Rubus chlorotic mottle virus                | 4               | 4               | RNA          | NA                 |
| Virus | Rudbeckia flower distortion virus           | 7               | 7               | DNA          | 2                  |
| Virus | Rupestris stem pitting-associated virus     | 5               | 4               | RNA          | NA                 |
| Virus | Ryegrass mosaic virus                       | 12              | 4               | RNA          | 1                  |
| Virus | Ryegrass mottle virus                       | 7               | 4               | RNA          | 1                  |
| Virus | Sabia virus                                 | 4               | 5               | RNA          | NA                 |
| Virus | Sacbrood virus                              | 1               | 4               | RNA          | 1                  |
| Virus | Saccharomyces 20S RNA narnavirus            | 1               | 4               | RNA          | 1                  |
| Virus | Saccharomyces 23S RNA narnavirus            | 1               | 4               | RNA          | 1                  |
| Virus | Saccharomyces cerevisiae killer virus M1    | 1               | 3               | RNA          | NA                 |
| Virus | Saccharomyces cerevisiae virus L-A          | 3               | 3               | RNA          | NA                 |
| Virus | Saccharomyces cerevisiae virus L-BC (La)    | 2               | 3               | RNA          | NA                 |
| Virus | Saccharum streak virus                      | 3               | 2               | DNA          | 3                  |
| Virus | Saffold virus                               | 13              | 4               | RNA          | 1                  |
| Virus | Saguaro cactus virus                        | 8               | 4               | RNA          | 1                  |
| Virus | Saimiriine herpesvirus 1                    | 70              | 1               | DNA          | NA                 |
| Virus | Saimiriine herpesvirus 2                    | 76              | 1               | DNA          | NA                 |
| Virus | Saimiriine herpesvirus 3                    | 142             | 1               | DNA          | NA                 |
| Virus | Salisaeta icosahedral phage 1               | 57              | 1               | DNA          | NA                 |
| Virus | Salivirus NG-J1                             | 12              | 4               | RNA          | 1                  |
| Virus | Salmon pancreas disease virus               | 13              | 4               | RNA          | 1                  |
| Virus | Salmonella enterica bacteriophage SE1       | 67              | 1               | DNA          | 4                  |
| Virus | Salmonella phage 7-11                       | 151             | 1               | DNA          | 4                  |
| Virus | Salmonella phage c341                       | 68              | 1               | DNA          | NA                 |
| Virus | Salmonella phage E1                         | 51              | 1               | DNA          | NA                 |
| Virus | Salmonella phage epsilon34                  | 73              | 1               | DNA          | 4                  |
| Virus | Salmonella phage Felix01                    | 131             | 1               | DNA          | 4                  |
| Virus | Salmonella phage Fels-1                     | 52              | NA              | NA           | NA                 |
| Virus | Salmonella phage Fels-2                     | 47              | 1               | DNA          | 4                  |
| Virus | Salmonella phage phiSG-JL2                  | 55              | 1               | DNA          | 4                  |
| Virus | Salmonella phage PVP-SE1                    | 244             | 1               | DNA          | 4                  |
| Virus | Salmonella phage SE2                        | 61              | 1               | DNA          | 4                  |
| Virus | Salmonella phage SETP3                      | 53              | 1               | DNA          | 4                  |
| Virus | Salmonella phage SFP10                      | 201             | 1               | DNA          | 4                  |
| Virus | Salmonella phage SPN19                      | 72              | 1               | DNA          | 4                  |
| Virus | Salmonella phage SPN1S                      | 52              | 1               | DNA          | 4                  |
| Virus | Salmonella phage SPN9CC                     | 62              | 1               | DNA          | 4                  |
| Virus | Salmonella phage SS3e                       | 58              | 1               | DNA          | 4                  |
| Virus | Salmonella phage SSU5                       | 130             | 1               | DNA          | 4                  |
| Virus | Salmonella phage ST160                      | 63              | 1               | DNA          | 4                  |
| Virus | Salmonella phage ST64B                      | 56              | 1               | DNA          | NA                 |
| Virus | Salmonella phage vB_SemP_Emek               | 70              | 1               | DNA          | 4                  |
| Virus | Salmonella phage vB_SosS_Oslo               | 79              | 1               | DNA          | 4                  |
| Virus | Salmonella phage Vi01                       | 208             | 1               | DNA          | 4                  |
| Virus | Salmonella phage Vi06                       | 47              | 1               | DNA          | 4                  |
| Virus | Sandfly fever Naples virus                  | 4               | 5               | RNA          | NA                 |

| Type  | Name                                                          | Number of genes | Baltimore class | Nucleic Acid | Monophyletic group |
|-------|---------------------------------------------------------------|-----------------|-----------------|--------------|--------------------|
| Virus | Sandfly fever Turkey virus                                    | 4               | 5               | RNA          | NA                 |
| Virus | Santeuil nodavirus                                            | 3               | 4               | RNA          | 1                  |
| Virus | Sapovirus C12                                                 | 3               | 4               | RNA          | 1                  |
| Virus | Sapovirus Hu/Dresden/pJG-Sap01/DE                             | 3               | 4               | RNA          | 1                  |
| Virus | Sapovirus Mc10                                                | 3               | 4               | RNA          | 1                  |
| Virus | SARS coronavirus                                              | 30              | 4               | RNA          | NA                 |
| Virus | Satellite virus of maize white line mosaic virus              | 1               | NA              | NA           | NA                 |
| Virus | Sathuperi virus                                               | 4               | 5               | RNA          | NA                 |
| Virus | Satsuma dwarf virus                                           | 8               | 4               | RNA          | 1                  |
| Virus | Scallion mosaic virus                                         | 12              | 4               | RNA          | 1                  |
| Virus | Scallion virus X                                              | 5               | 4               | RNA          | 1                  |
| Virus | Schizochytrium single-stranded RNA virus                      | 2               | 4               | RNA          | 1                  |
| Virus | Schlumbergera virus X                                         | 5               | 4               | RNA          | 1                  |
| Virus | Sclerophthora macrospora virus A                              | 3               | 4               | RNA          | NA                 |
| Virus | Sclerophthora macrospora virus B                              | 2               | 4               | RNA          | NA                 |
| Virus | Sclerotinia sclerotiorum debilitation-associated RNA virus    | 1               | 4               | RNA          | 1                  |
| Virus | Sclerotinia sclerotiorum dsRNA mycovirus-L                    | 2               | 3               | RNA          | NA                 |
| Virus | Sclerotinia sclerotiorum hypovirulence associated DNA virus 1 | 2               | 2               | DNA          | NA                 |
| Virus | Sclerotinia sclerotiorum hypovirus 1                          | 1               | 3               | RNA          | NA                 |
| Virus | Sclerotinia sclerotiorum partitivirus S                       | 2               | 3               | RNA          | 1                  |
| Virus | Scotophilus bat coronavirus 512                               | 6               | 4               | RNA          | NA                 |
| Virus | Scrophularia mottle virus                                     | 3               | 4               | RNA          | 1                  |
| Virus | Sea turtle tornovirus 1                                       | 3               | 2               | DNA          | NA                 |
| Virus | Seal anellovirus TFFN/USA/2006                                | 3               | 2               | DNA          | NA                 |
| Virus | Seal picornavirus type 1                                      | 12              | 4               | RNA          | 1                  |
| Virus | Semliki forest virus                                          | 14              | 4               | RNA          | 1                  |
| Virus | Sendai virus                                                  | 10              | 5               | RNA          | NA                 |
| Virus | Seneca valley virus                                           | 1               | 4               | RNA          | 1                  |
| Virus | Senecio yellow mosaic virus                                   | 6               | 2               | DNA          | 3                  |
| Virus | Seoul virus                                                   | 3               | 5               | RNA          | NA                 |
| Virus | Sepik virus                                                   | 1               | 4               | RNA          | 1                  |
| Virus | Sesbania mosaic virus                                         | 8               | 4               | RNA          | 1                  |
| Virus | SFTS virus HB29                                               | 6               | 5               | RNA          | NA                 |
| Virus | Shallot virus X                                               | 6               | 4               | RNA          | 1                  |
| Virus | Shallot yellow stripe virus                                   | 13              | 4               | RNA          | 1                  |
| Virus | Shamonda virus                                                | 4               | 5               | RNA          | NA                 |
| Virus | Sheeppox virus                                                | 148             | 1               | DNA          | 5                  |
| Virus | Sheldgoose hepatitis B virus                                  | 5               | 7               | DNA          | 2                  |
| Virus | Shigella phage EP23                                           | 57              | 1               | DNA          | 4                  |
| Virus | Shigella phage phiSboM-AG3                                    | 216             | 1               | DNA          | 4                  |
| Virus | Shigella phage Shf1                                           | 80              | 1               | DNA          | 4                  |
| Virus | Shigella phage Shf2                                           | 265             | 1               | DNA          | 4                  |
| Virus | Shigella phage SP18                                           | 284             | 1               | DNA          | 4                  |
| Virus | Shrimp white spot syndrome virus                              | 531             | 1               | DNA          | NA                 |
| Virus | Sibine fusca densovirus                                       | 3               | 2               | DNA          | 3                  |
| Virus | Sida golden mosaic Costa Rica virus                           | 7               | 2               | DNA          | 3                  |
| Virus | Sida golden mosaic Florida virus                              | 7               | 2               | DNA          | 3                  |
| Virus | Sida golden mosaic Florida virus-Malvastrum                   | 7               | 2               | DNA          | 3                  |
| Virus | Sida golden mosaic Honduras virus                             | 7               | 2               | DNA          | 3                  |
| Virus | Sida golden mosaic virus                                      | 7               | 2               | DNA          | 3                  |
| Virus | Sida golden mottle virus                                      | 7               | 2               | DNA          | 3                  |
| Virus | Sida leaf curl virus                                          | 6               | 2               | DNA          | 3                  |
| Virus | Sida leaf curl virus satellite DNA beta                       | 1               | 2               | DNA          | 3                  |
| Virus | Sida leaf curl virus-associated DNA 1                         | 1               | 2               | DNA          | 3                  |
| Virus | Sida leaf curl virus-associated DNA beta                      | 1               | 2               | DNA          | 3                  |
| Virus | Sida micrantha mosaic virus                                   | 7               | 2               | DNA          | 3                  |
| Virus | Sida mosaic Alagoas virus                                     | 7               | 2               | DNA          | 3                  |
| Virus | Sida mosaic Bolivia virus 1                                   | 7               | 2               | DNA          | 3                  |
| Virus | Sida mosaic Bolivia virus 2                                   | 7               | 2               | DNA          | 3                  |
| Virus | Sida mosaic Sinaloa virus                                     | 7               | 2               | DNA          | 3                  |
| Virus | Sida mottle virus                                             | 6               | 2               | DNA          | 3                  |
| Virus | Sida yellow mosaic virus                                      | 6               | 2               | DNA          | 3                  |
| Virus | Sida yellow mosaic Yucatan virus                              | 6               | 2               | DNA          | 3                  |
| Virus | Sida yellow mottle virus                                      | 7               | 2               | DNA          | 3                  |
| Virus | Sida yellow vein disease associated DNA 1                     | 1               | 2               | DNA          | NA                 |
| Virus | Sida yellow vein Madurai virus                                | 6               | 2               | DNA          | 3                  |
| Virus | Sida yellow vein Vietnam alphasatellite                       | 1               | 2               | DNA          | NA                 |
| Virus | Sida yellow vein Vietnam virus                                | 6               | 2               | DNA          | 3                  |
| Virus | Sida yellow vein Vietnam virus satellite DNA beta             | 1               | 2               | DNA          | 3                  |
| Virus | Sida yellow vein virus                                        | 7               | 2               | DNA          | 3                  |
| Virus | Sida yellow vein virus satellite DNA beta                     | 1               | 2               | DNA          | NA                 |
| Virus | Siegesbeckia yellow vein Guangxi virus                        | 6               | 2               | DNA          | 3                  |
| Virus | Siegesbeckia yellow vein virus                                | 6               | 2               | DNA          | 3                  |
| Virus | Siegesbeckia yellow vein virus-associated DNA beta            | 1               | 2               | DNA          | NA                 |
| Virus | Simbu virus                                                   | 4               | 5               | RNA          | NA                 |
| Virus | Simian adenovirus 1                                           | 35              | 1               | DNA          | NA                 |
| Virus | Simian adenovirus 21                                          | 38              | 1               | DNA          | NA                 |
| Virus | Simian adenovirus 25                                          | 38              | 1               | DNA          | NA                 |
| Virus | Simian adenovirus 3                                           | 34              | 1               | DNA          | NA                 |
| Virus | Simian adenovirus 49                                          | 32              | 1               | DNA          | NA                 |

| Type  | Name                                     | Number of genes | Baltimore class | Nucleic Acid | Monophyletic group |
|-------|------------------------------------------|-----------------|-----------------|--------------|--------------------|
| Virus | Simian agent 12                          | 6               | 1               | DNA          | 3                  |
| Virus | Simian enterovirus A                     | 12              | 4               | RNA          | 1                  |
| Virus | Simian enterovirus SV19                  | 12              | 4               | RNA          | 1                  |
| Virus | Simian enterovirus SV43                  | 12              | 4               | RNA          | 1                  |
| Virus | Simian enterovirus SV6                   | 12              | 4               | RNA          | 1                  |
| Virus | Simian foamy virus                       | 6               | 6               | RNA          | 2                  |
| Virus | Simian hemorrhagic fever virus           | 15              | 4               | RNA          | NA                 |
| Virus | Simian immunodeficiency virus            | 6               | 6               | RNA          | 2                  |
| Virus | Simian immunodeficiency virus SIV-mnd 2  | 8               | 6               | RNA          | 2                  |
| Virus | Simian picornavirus 17                   | 12              | 4               | RNA          | 1                  |
| Virus | Simian picornavirus strain N125          | 12              | 4               | RNA          | 1                  |
| Virus | Simian picornavirus strain N203          | 12              | 4               | RNA          | 1                  |
| Virus | Simian retrovirus 4                      | 4               | 6               | RNA          | 2                  |
| Virus | Simian sapelovirus 1                     | 13              | 4               | RNA          | 1                  |
| Virus | Simian T-cell lymphotropic virus 6       | 6               | 6               | RNA          | 2                  |
| Virus | Simian T-lymphotropic virus 1            | 4               | 6               | RNA          | 2                  |
| Virus | Simian T-lymphotropic virus 2            | 12              | 6               | RNA          | 2                  |
| Virus | Simian T-lymphotropic virus 3            | 5               | 6               | RNA          | 2                  |
| Virus | Simian virus 12                          | 6               | 1               | DNA          | 3                  |
| Virus | Simian virus 40                          | 7               | 1               | DNA          | 3                  |
| Virus | Simian virus 41                          | 7               | 5               | RNA          | NA                 |
| Virus | Simian-Human immunodeficiency virus      | 10              | 6               | RNA          | 2                  |
| Virus | Sin Nombre virus                         | 4               | 5               | RNA          | NA                 |
| Virus | Sindbis virus                            | 14              | 4               | RNA          | 1                  |
| Virus | Singapore grouper iridovirus             | 162             | 1               | DNA          | 5                  |
| Virus | Siniperca chuatsi rhabdovirus            | 6               | 5               | RNA          | NA                 |
| Virus | Sinorhizobium phage PBC5                 | 83              | 1               | DNA          | NA                 |
| Virus | Sleeping disease virus                   | 13              | 4               | RNA          | 1                  |
| Virus | Slow bee paralysis virus                 | 1               | 4               | RNA          | 1                  |
| Virus | Small anellovirus 1                      | 3               | 2               | DNA          | NA                 |
| Virus | Small anellovirus 2                      | 5               | 2               | DNA          | NA                 |
| Virus | Snake adenovirus 1                       | 28              | 1               | DNA          | NA                 |
| Virus | Snake parvovirus 1                       | 2               | 2               | DNA          | 3                  |
| Virus | Snakehead retrovirus                     | 7               | 6               | RNA          | 2                  |
| Virus | Snakehead virus                          | 6               | 5               | RNA          | NA                 |
| Virus | Snow goose hepatitis B virus             | 5               | 7               | DNA          | 2                  |
| Virus | Sodalis phage phiSG1                     | 47              | NA              | NA           | NA                 |
| Virus | Sodalis phage SO-1                       | 59              | 1               | DNA          | 4                  |
| Virus | Soil-borne cereal mosaic virus           | 6               | 4               | RNA          | 1                  |
| Virus | Soil-borne wheat mosaic virus            | 6               | 4               | RNA          | 1                  |
| Virus | Solenopsis invicta virus 2               | 4               | 4               | RNA          | NA                 |
| Virus | Solenopsis invicta virus 3               | 2               | 4               | RNA          | NA                 |
| Virus | Solenopsis invicta virus-1               | 2               | 4               | RNA          | 1                  |
| Virus | Sonchus yellow net virus                 | 6               | 5               | RNA          | NA                 |
| Virus | Sorghum chlorotic spot virus             | 7               | 4               | RNA          | 1                  |
| Virus | Sorghum mosaic virus                     | 12              | 4               | RNA          | 1                  |
| Virus | South African cassava mosaic virus       | 8               | 2               | DNA          | 3                  |
| Virus | South polar skuia adenovirus-1           | 23              | 1               | DNA          | NA                 |
| Virus | Southern bean mosaic virus               | 7               | 4               | RNA          | 1                  |
| Virus | Southern cowpea mosaic virus             | 7               | 4               | RNA          | 1                  |
| Virus | Southern elephant seal virus             | 4               | 4               | RNA          | 1                  |
| Virus | Southern rice black-streaked dwarf virus | 13              | 3               | RNA          | NA                 |
| Virus | Southern tomato virus                    | 2               | 3               | RNA          | NA                 |
| Virus | Sowbane mosaic virus                     | 4               | 4               | RNA          | 1                  |
| Virus | Soybean chlorotic blotch virus           | 9               | 2               | DNA          | 3                  |
| Virus | Soybean chlorotic mottle virus           | 9               | 7               | DNA          | 2                  |
| Virus | Soybean chlorotic spot virus             | 6               | 2               | DNA          | 3                  |
| Virus | Soybean crinkle leaf virus               | 8               | 2               | DNA          | 3                  |
| Virus | Soybean dwarf virus                      | 5               | 4               | RNA          | 1                  |
| Virus | Soybean mild mottle virus                | 6               | 2               | DNA          | 3                  |
| Virus | Soybean mosaic virus                     | 12              | 4               | RNA          | 1                  |
| Virus | Soybean Putnam virus                     | 6               | 7               | DNA          | 2                  |
| Virus | Soybean yellow common mosaic virus       | 4               | 4               | RNA          | NA                 |
| Virus | Soybean yellow mottle mosaic virus       | 5               | 4               | RNA          | 1                  |
| Virus | Sparrow coronavirus HKU17                | 8               | 4               | RNA          | NA                 |
| Virus | Sphaeropsis sapinea RNA virus 1          | 2               | 3               | RNA          | NA                 |
| Virus | Sphaeropsis sapinea RNA virus 2          | 2               | 3               | RNA          | NA                 |
| Virus | Spilanthes yellow vein virus             | 6               | 2               | DNA          | 3                  |
| Virus | Spinach curly top Arizona virus          | 5               | 2               | DNA          | 3                  |
| Virus | Spinach curly top virus                  | 7               | 2               | DNA          | 3                  |
| Virus | Spinach latent virus                     | 5               | 4               | RNA          | 1                  |
| Virus | Spinach severe curly top virus           | 6               | 2               | DNA          | 3                  |
| Virus | Spiroplasma kunkelii virus SkV1_CR2-3x   | 13              | 2               | DNA          | NA                 |
| Virus | Spiroplasma phage 1-C74                  | 13              | 2               | DNA          | NA                 |
| Virus | Spiroplasma phage 1-R8A2B                | 12              | 2               | DNA          | NA                 |
| Virus | Spiroplasma phage 4                      | 9               | 2               | DNA          | NA                 |
| Virus | Spiroplasma phage SVTS2                  | 13              | 2               | DNA          | NA                 |
| Virus | Spissistilus festinus reovirus           | 10              | 3               | RNA          | NA                 |
| Virus | Spissistilus festinus virus 1            | 2               | 3               | RNA          | NA                 |
| Virus | Spleen focus-forming virus               | 4               | 6               | RNA          | 2                  |

| Type  | Name                                      | Number of genes | Baltimore class | Nucleic Acid | Monophyletic group |
|-------|-------------------------------------------|-----------------|-----------------|--------------|--------------------|
| Virus | Spodoptera exigua iflavirus 1             | 3               | 4               | RNA          | 1                  |
| Virus | Spodoptera exigua MNPV                    | 139             | 1               | DNA          | NA                 |
| Virus | Spodoptera frugiperda ascovirus 1a        | 123             | 1               | DNA          | 5                  |
| Virus | Spodoptera frugiperda MNPV                | 143             | 1               | DNA          | NA                 |
| Virus | Spodoptera litura granulovirus            | 136             | 1               | DNA          | NA                 |
| Virus | Spodoptera litura NPV                     | 141             | 1               | DNA          | NA                 |
| Virus | Spodoptera litura nucleopolyhedrovirus II | 147             | 1               | DNA          | NA                 |
| Virus | Sporobolus striate mosaic virus 1         | 4               | 2               | DNA          | 3                  |
| Virus | Sporobolus striate mosaic virus 2         | 4               | 2               | DNA          | 3                  |
| Virus | Spring beauty latent virus                | 4               | 4               | RNA          | 1                  |
| Virus | Spring viraemia of carp virus             | 5               | 5               | RNA          | NA                 |
| Virus | Sputnik virophage                         | 21              | 1               | DNA          | Unconsidered       |
| Virus | Sputnik2_proteome_aa                      | 20              | 1               | DNA          | Unconsidered       |
| Virus | Sputnik3_proteome_aa                      | 20              | 1               | DNA          | Unconsidered       |
| Virus | Squash leaf curl China virus              | 2               | 2               | DNA          | 3                  |
| Virus | Squash leaf curl Philippines virus        | 7               | 2               | DNA          | 3                  |
| Virus | Squash leaf curl virus                    | 6               | 2               | DNA          | 3                  |
| Virus | Squash leaf curl Yunnan virus             | 6               | 2               | DNA          | 3                  |
| Virus | Squash mild leaf curl virus               | 6               | 2               | DNA          | 3                  |
| Virus | Squash mosaic virus                       | 10              | 4               | RNA          | 1                  |
| Virus | Squash vein yellowing virus               | 12              | 4               | RNA          | 1                  |
| Virus | Squash yellow mild mottle virus           | 6               | 2               | DNA          | 3                  |
| Virus | Squirrel monkey polyomavirus              | 6               | 1               | DNA          | 3                  |
| Virus | Squirrel monkey retrovirus                | 6               | 6               | RNA          | 2                  |
| Virus | Sri Lankan cassava mosaic virus           | 8               | 2               | DNA          | 3                  |
| Virus | St Croix River virus                      | 10              | 3               | RNA          | NA                 |
| Virus | St. Augustine decline satellite virus     | 1               | NA              | NA           | NA                 |
| Virus | St. Louis encephalitis virus              | 1               | 4               | RNA          | 1                  |
| Virus | Stachytarpheta leaf curl virus            | 6               | 2               | DNA          | 3                  |
| Virus | Staphylococcus aureus phage P68           | 22              | 1               | DNA          | NA                 |
| Virus | Staphylococcus phage 11                   | 53              | 1               | DNA          | 4                  |
| Virus | Staphylococcus phage 187                  | 77              | 1               | DNA          | 4                  |
| Virus | Staphylococcus phage 2638A                | 57              | 1               | DNA          | 4                  |
| Virus | Staphylococcus phage 29                   | 67              | 1               | DNA          | 4                  |
| Virus | Staphylococcus phage 37                   | 70              | 1               | DNA          | 4                  |
| Virus | Staphylococcus phage 3A                   | 67              | 1               | DNA          | 4                  |
| Virus | Staphylococcus phage 42E                  | 79              | 1               | DNA          | 4                  |
| Virus | Staphylococcus phage 44AHJD               | 21              | 1               | DNA          | 4                  |
| Virus | Staphylococcus phage 47                   | 65              | 1               | DNA          | 4                  |
| Virus | Staphylococcus phage 52A                  | 60              | 1               | DNA          | 4                  |
| Virus | Staphylococcus phage 53                   | 74              | 1               | DNA          | 4                  |
| Virus | Staphylococcus phage 55                   | 77              | 1               | DNA          | 4                  |
| Virus | Staphylococcus phage 66                   | 27              | 1               | DNA          | 4                  |
| Virus | Staphylococcus phage 69                   | 69              | 1               | DNA          | 4                  |
| Virus | Staphylococcus phage 71                   | 67              | 1               | DNA          | 4                  |
| Virus | Staphylococcus phage 77                   | 69              | 1               | DNA          | 4                  |
| Virus | Staphylococcus phage 80alpha              | 73              | 1               | DNA          | 4                  |
| Virus | Staphylococcus phage 85                   | 71              | 1               | DNA          | 4                  |
| Virus | Staphylococcus phage 88                   | 66              | 1               | DNA          | 4                  |
| Virus | Staphylococcus phage 92                   | 64              | 1               | DNA          | 4                  |
| Virus | Staphylococcus phage 96                   | 74              | 1               | DNA          | 4                  |
| Virus | Staphylococcus phage CNPH82               | 65              | 1               | DNA          | 4                  |
| Virus | Staphylococcus phage EW                   | 77              | 1               | DNA          | 4                  |
| Virus | Staphylococcus phage G1                   | 214             | 1               | DNA          | 4                  |
| Virus | Staphylococcus phage K                    | 115             | 1               | DNA          | 4                  |
| Virus | Staphylococcus phage P954                 | 69              | 1               | DNA          | NA                 |
| Virus | Staphylococcus phage PH15                 | 68              | 1               | DNA          | 4                  |
| Virus | Staphylococcus phage phi 12               | 49              | 1               | DNA          | 4                  |
| Virus | Staphylococcus phage phi13                | 49              | 1               | DNA          | 4                  |
| Virus | Staphylococcus phage phi2958PVL           | 60              | NA              | NA           | NA                 |
| Virus | Staphylococcus phage phiETA               | 66              | 1               | DNA          | 4                  |
| Virus | Staphylococcus phage phiETA2              | 69              | 1               | DNA          | 4                  |
| Virus | Staphylococcus phage phiETA3              | 68              | 1               | DNA          | 4                  |
| Virus | Staphylococcus phage phiMR11              | 67              | 1               | DNA          | 4                  |
| Virus | Staphylococcus phage phiMR25              | 70              | 1               | DNA          | 4                  |
| Virus | Staphylococcus phage phiN315              | 65              | 1               | DNA          | 4                  |
| Virus | Staphylococcus phage phiNM                | 64              | 1               | DNA          | 4                  |
| Virus | Staphylococcus phage phiNM3               | 65              | 1               | DNA          | 4                  |
| Virus | Staphylococcus phage phiPVL-CN125         | 65              | 1               | DNA          | NA                 |
| Virus | Staphylococcus phage phiPVL108            | 59              | 1               | DNA          | 4                  |
| Virus | Staphylococcus phage phiSauS-IPLA35       | 62              | 1               | DNA          | 4                  |
| Virus | Staphylococcus phage phiSauS-IPLA88       | 60              | 1               | DNA          | 4                  |
| Virus | Staphylococcus phage phiSLT               | 61              | 1               | DNA          | 4                  |
| Virus | Staphylococcus phage PT1028               | 22              | 1               | DNA          | NA                 |
| Virus | Staphylococcus phage PVL                  | 62              | 1               | DNA          | 4                  |
| Virus | Staphylococcus phage ROSA                 | 74              | 1               | DNA          | NA                 |
| Virus | Staphylococcus phage S24-1                | 21              | 1               | DNA          | 4                  |
| Virus | Staphylococcus phage SAP-2                | 20              | 1               | DNA          | 4                  |
| Virus | Staphylococcus phage SAP-26               | 63              | 1               | DNA          | 4                  |
| Virus | Staphylococcus phage SpaA1                | 63              | NA              | NA           | NA                 |

| Type  | Name                                           | Number of genes | Baltimore class | Nucleic Acid | Monophyletic group |
|-------|------------------------------------------------|-----------------|-----------------|--------------|--------------------|
| Virus | Staphylococcus phage TEM123                    | 43              | 1               | DNA          | 4                  |
| Virus | Staphylococcus phage tp310-1                   | 59              | NA              | NA           | NA                 |
| Virus | Staphylococcus phage tp310-2                   | 67              | 1               | DNA          | 4                  |
| Virus | Staphylococcus phage tp310-3                   | 58              | NA              | NA           | NA                 |
| Virus | Staphylococcus phage Twort                     | 195             | 1               | DNA          | 4                  |
| Virus | Staphylococcus phage vB_SepiS-philPLA5         | 66              | 1               | DNA          | 4                  |
| Virus | Staphylococcus phage vB_SepiS-philPLA7         | 59              | 1               | DNA          | 4                  |
| Virus | Staphylococcus phage X2                        | 77              | 1               | DNA          | 4                  |
| Virus | Staphylococcus prophage phiPV83                | 65              | 1               | DNA          | 4                  |
| Virus | Starling circovirus                            | 3               | 2               | DNA          | 3                  |
| Virus | Steller sea lion vesivirus                     | 3               | 4               | RNA          | 1                  |
| Virus | Stenotrophomonas phage IME15                   | 45              | 1               | DNA          | 4                  |
| Virus | Stenotrophomonas phage phiSHP2                 | 9               | 2               | DNA          | NA                 |
| Virus | Stenotrophomonas phage S1                      | 48              | 1               | DNA          | 4                  |
| Virus | Strawberry chlorotic fleck-associated virus    | 13              | 4               | RNA          | 1                  |
| Virus | Strawberry latent ringspot virus               | 10              | 4               | RNA          | 1                  |
| Virus | Strawberry latent ringspot virus satellite RNA | 1               | NA              | RNA          | NA                 |
| Virus | Strawberry mild yellow edge virus              | 6               | 4               | RNA          | 1                  |
| Virus | Strawberry mottle virus                        | 10              | 4               | RNA          | 1                  |
| Virus | Strawberry necrotic shock virus                | 5               | 4               | RNA          | 1                  |
| Virus | Strawberry pallidosis-associated virus         | 12              | 4               | RNA          | 1                  |
| Virus | Strawberry vein banding virus                  | 6               | 7               | DNA          | 2                  |
| Virus | Streptocarpus flower break virus               | 4               | 4               | RNA          | 1                  |
| Virus | Streptococcus phage 2972                       | 44              | 1               | DNA          | 4                  |
| Virus | Streptococcus phage 5093                       | 48              | 1               | DNA          | 4                  |
| Virus | Streptococcus phage 7201                       | 46              | 1               | DNA          | 4                  |
| Virus | Streptococcus phage 858                        | 46              | 1               | DNA          | 4                  |
| Virus | Streptococcus phage Abc2                       | 48              | 1               | DNA          | 4                  |
| Virus | Streptococcus phage ALQ13.2                    | 44              | 1               | DNA          | 4                  |
| Virus | Streptococcus phage C1                         | 20              | 1               | DNA          | 4                  |
| Virus | Streptococcus phage Cp-1                       | 25              | 1               | DNA          | 4                  |
| Virus | Streptococcus phage Dp-1                       | 72              | 1               | DNA          | 4                  |
| Virus | Streptococcus phage DT1                        | 45              | 1               | DNA          | 4                  |
| Virus | Streptococcus phage EJ-1                       | 73              | 1               | DNA          | 4                  |
| Virus | Streptococcus phage M102                       | 41              | 1               | DNA          | 4                  |
| Virus | Streptococcus phage MM1                        | 53              | 1               | DNA          | 4                  |
| Virus | Streptococcus phage O1205                      | 57              | 1               | DNA          | 4                  |
| Virus | Streptococcus phage P9                         | 53              | 1               | DNA          | 4                  |
| Virus | Streptococcus phage PH10                       | 54              | 1               | DNA          | 4                  |
| Virus | Streptococcus phage PH15                       | 60              | 1               | DNA          | 4                  |
| Virus | Streptococcus phage phi3396                    | 64              | 1               | DNA          | 4                  |
| Virus | Streptococcus phage phiNJ2                     | 55              | 1               | DNA          | 4                  |
| Virus | Streptococcus phage Sfi11                      | 53              | 1               | DNA          | 4                  |
| Virus | Streptococcus phage Sfi19                      | 45              | 1               | DNA          | 4                  |
| Virus | Streptococcus phage Sfi21                      | 50              | 1               | DNA          | 4                  |
| Virus | Streptococcus phage SM1                        | 56              | 1               | DNA          | 4                  |
| Virus | Streptococcus phage SMP                        | 48              | 1               | DNA          | 4                  |
| Virus | Streptococcus phage YMC-2011                   | 55              | 1               | DNA          | 4                  |
| Virus | Streptococcus pyogenes phage 315.1             | 56              | NA              | NA           | NA                 |
| Virus | Streptococcus pyogenes phage 315.2             | 60              | 1               | DNA          | NA                 |
| Virus | Streptococcus pyogenes phage 315.3             | 52              | NA              | DNA          | NA                 |
| Virus | Streptococcus pyogenes phage 315.4             | 64              | NA              | NA           | NA                 |
| Virus | Streptococcus pyogenes phage 315.5             | 55              | NA              | NA           | NA                 |
| Virus | Streptococcus pyogenes phage 315.6             | 51              | NA              | NA           | NA                 |
| Virus | Streptomyces phage TG1                         | 54              | 1               | DNA          | 4                  |
| Virus | Streptomyces phage mu1/6                       | 52              | 1               | DNA          | 4                  |
| Virus | Streptomyces phage phiBT1                      | 55              | 1               | DNA          | 4                  |
| Virus | Streptomyces phage phiC31                      | 54              | 1               | DNA          | 4                  |
| Virus | Streptomyces phage phiHau3                     | 72              | 1               | DNA          | 4                  |
| Virus | Streptomyces phage phiSASD1                    | 43              | 1               | DNA          | 4                  |
| Virus | Streptomyces phage R4                          | 86              | 1               | DNA          | 4                  |
| Virus | Streptomyces phage SV1                         | 55              | 1               | DNA          | 4                  |
| Virus | Streptomyces phage VWB                         | 61              | 1               | DNA          | 4                  |
| Virus | Stretch Lagoon orbivirus                       | 2               | 3               | RNA          | NA                 |
| Virus | Striped Jack nervous necrosis virus            | 3               | 4               | RNA          | 1                  |
| Virus | Stx1 converting phage                          | 84              | 1               | DNA          | NA                 |
| Virus | Stx2 converting phage I                        | 166             | 1               | DNA          | 4                  |
| Virus | Stx2 converting phage II                       | 89              | 1               | DNA          | 4                  |
| Virus | Stx2-converting phage 1717                     | 77              | 1               | DNA          | 4                  |
| Virus | Stx2-converting phage 86                       | 81              | 1               | DNA          | 4                  |
| Virus | Suakwa aphid-borne yellows virus               | 6               | 4               | RNA          | 1                  |
| Virus | Subterranean clover mottle virus               | 7               | 4               | RNA          | 1                  |
| Virus | Subterranean clover stunt virus                | 8               | 2               | DNA          | NA                 |
| Virus | Sudan ebolavirus                               | 8               | 5               | RNA          | NA                 |
| Virus | Sugarcane bacilliform IM virus                 | 3               | 7               | DNA          | 2                  |
| Virus | Sugarcane bacilliform Mor virus                | 3               | 7               | DNA          | 2                  |
| Virus | Sugarcane bacilliform virus                    | 3               | 7               | DNA          | 2                  |
| Virus | Sugarcane mosaic virus                         | 12              | 4               | RNA          | 1                  |
| Virus | Sugarcane streak Egypt virus                   | 4               | 2               | DNA          | 3                  |
| Virus | Sugarcane streak mosaic virus                  | 11              | 4               | RNA          | 1                  |

| Type  | Name                                        | Number of genes | Baltimore class | Nucleic Acid | Monophyletic group |
|-------|---------------------------------------------|-----------------|-----------------|--------------|--------------------|
| Virus | Sugarcane streak Reunion virus              | 4               | 2               | DNA          | 3                  |
| Virus | Sugarcane streak virus                      | 3               | 2               | DNA          | 3                  |
| Virus | Sugarcane striate mosaic-associated virus   | 5               | 4               | RNA          | 1                  |
| Virus | Sugarcane yellow leaf virus                 | 9               | 4               | RNA          | 1                  |
| Virus | Suid herpesvirus 1                          | 69              | 1               | DNA          | NA                 |
| Virus | Sulfolobales Mexican rudivirus 1            | 37              | 1               | DNA          | 3                  |
| Virus | Sulfolobus islandicus filamentous virus     | 73              | 1               | DNA          | NA                 |
| Virus | Sulfolobus islandicus rod-shaped virus 1    | 45              | 1               | DNA          | NA                 |
| Virus | Sulfolobus islandicus rod-shaped virus 2    | 54              | 1               | DNA          | NA                 |
| Virus | Sulfolobus spindle-shaped virus 4           | 34              | 1               | DNA          | NA                 |
| Virus | Sulfolobus spindle-shaped virus 5           | 34              | 1               | DNA          | NA                 |
| Virus | Sulfolobus spindle-shaped virus 6           | 33              | 1               | DNA          | NA                 |
| Virus | Sulfolobus spindle-shaped virus 7           | 33              | 1               | DNA          | NA                 |
| Virus | Sulfolobus turreted icosahedral virus       | 36              | 1               | DNA          | NA                 |
| Virus | Sulfolobus turreted icosahedral virus 2     | 34              | 1               | DNA          | NA                 |
| Virus | Sulfolobus virus 1                          | 32              | 1               | DNA          | NA                 |
| Virus | Sulfolobus virus 2                          | 34              | 1               | DNA          | NA                 |
| Virus | Sulfolobus virus Kamchatka 1                | 31              | 1               | DNA          | NA                 |
| Virus | Sulfolobus virus Ragged Hills               | 37              | 1               | DNA          | NA                 |
| Virus | Sulfolobus virus STSV1                      | 74              | 1               | DNA          | NA                 |
| Virus | Sunflower chlorotic mottle virus            | 12              | 4               | RNA          | 1                  |
| Virus | Sunn hemp leaf distortion virus             | 2               | 2               | DNA          | 3                  |
| Virus | Sus scrofa papillomavirus type 1            | 6               | 1               | DNA          | 3                  |
| Virus | Sweet clover necrotic mosaic virus          | 4               | 4               | RNA          | 1                  |
| Virus | Sweet potato caulimo-like virus             | 4               | 7               | DNA          | 2                  |
| Virus | Sweet potato chlorotic fleck virus          | 6               | 4               | RNA          | 1                  |
| Virus | Sweet potato chlorotic stunt virus          | 14              | 4               | RNA          | 1                  |
| Virus | Sweet potato feathery mottle virus          | 12              | 4               | RNA          | 1                  |
| Virus | Sweet potato golden vein associated virus   | 6               | 2               | DNA          | 3                  |
| Virus | Sweet potato leaf curl Bengal virus         | 6               | 2               | DNA          | 3                  |
| Virus | Sweet potato leaf curl Canary virus         | 6               | 2               | DNA          | 3                  |
| Virus | Sweet potato leaf curl Georgia virus        | 6               | 2               | DNA          | 3                  |
| Virus | Sweet potato leaf curl Lanzarote virus      | 6               | 2               | DNA          | 3                  |
| Virus | Sweet potato leaf curl South Carolina virus | 6               | 2               | DNA          | 3                  |
| Virus | Sweet potato leaf curl Spain virus          | 6               | 2               | DNA          | 3                  |
| Virus | Sweet potato leaf curl virus                | 6               | 2               | DNA          | 3                  |
| Virus | Sweet potato mild mottle virus              | 12              | 4               | RNA          | 1                  |
| Virus | Sweet potato vein clearing virus            | 9               | 7               | DNA          | 2                  |
| Virus | Sweet potato virus 2                        | 1               | 4               | RNA          | 1                  |
| Virus | Sweet potato virus C                        | 11              | 4               | RNA          | 1                  |
| Virus | Sweet potato virus C-6                      | 5               | 4               | RNA          | 1                  |
| Virus | Sweet potato virus G                        | 11              | 4               | RNA          | 1                  |
| Virus | Sweetpotato badnavirus A                    | 5               | 7               | DNA          | 2                  |
| Virus | Sweetpotato badnavirus B                    | 5               | 7               | DNA          | 2                  |
| Virus | Swine pasivirus 1                           | 12              | 4               | RNA          | 1                  |
| Virus | Swinepox virus                              | 150             | 1               | DNA          | 5                  |
| Virus | Switchgrass mosaic virus                    | 3               | 4               | RNA          | 1                  |
| Virus | Synechococcus phage P60                     | 80              | 1               | DNA          | 4                  |
| Virus | Synechococcus phage S-CBS1                  | 43              | 1               | DNA          | 4                  |
| Virus | Synechococcus phage S-CBS2                  | 102             | 1               | DNA          | 4                  |
| Virus | Synechococcus phage S-CBS3                  | 46              | 1               | DNA          | 4                  |
| Virus | Synechococcus phage S-CBS4                  | 105             | 1               | DNA          | 4                  |
| Virus | Synechococcus phage S-CRM01                 | 297             | 1               | DNA          | 4                  |
| Virus | Synechococcus phage S-PM2                   | 244             | 1               | DNA          | 4                  |
| Virus | Synechococcus phage S-RSM4                  | 237             | 1               | DNA          | 4                  |
| Virus | Synechococcus phage S-ShM2                  | 230             | 1               | DNA          | 4                  |
| Virus | Synechococcus phage S-SM1                   | 234             | 1               | DNA          | 4                  |
| Virus | Synechococcus phage S-SM2                   | 267             | 1               | DNA          | 4                  |
| Virus | Synechococcus phage S-SSM5                  | 225             | 1               | DNA          | 4                  |
| Virus | Synechococcus phage S-SSM7                  | 319             | 1               | DNA          | 4                  |
| Virus | Synechococcus phage Syn19                   | 215             | 1               | DNA          | 4                  |
| Virus | Synechococcus phage syn9                    | 226             | 1               | DNA          | 4                  |
| Virus | Tacaribe virus                              | 4               | 5               | RNA          | NA                 |
| Virus | Tai Forest ebolavirus                       | 9               | 5               | RNA          | NA                 |
| Virus | Tamana bat virus                            | 14              | 4               | RNA          | 1                  |
| Virus | Tamiami virus                               | 4               | 5               | RNA          | NA                 |
| Virus | Tamus red mosaic virus                      | 5               | 4               | RNA          | 1                  |
| Virus | Tanapox virus                               | 156             | 1               | DNA          | 5                  |
| Virus | Taro bacilliform virus                      | 3               | 7               | DNA          | 2                  |
| Virus | Taro vein chlorosis virus                   | 6               | 5               | RNA          | NA                 |
| Virus | Taterapox virus                             | 225             | 1               | DNA          | 5                  |
| Virus | Taura syndrome virus                        | 2               | 4               | RNA          | 1                  |
| Virus | Telosma mosaic virus                        | 12              | 4               | RNA          | 1                  |
| Virus | Tembusu virus                               | 1               | 4               | RNA          | 1                  |
| Virus | Temperate phage phiNIH1.1                   | 55              | 1               | DNA          | 4                  |
| Virus | TGP Carmovirus 1                            | 5               | 4               | RNA          | 1                  |
| Virus | Thalassomonas phage BA3                     | 47              | 1               | DNA          | 4                  |
| Virus | Theilovirus                                 | 14              | 4               | RNA          | 1                  |
| Virus | Thermoanaerobacterium phage THSA-485A       | 57              | 1               | DNA          | 4                  |
| Virus | Thermococcus prierii virus 1                | 28              | NA              | DNA          | NA                 |



| Type  | Name                                              | Number of genes | Baltimore class | Nucleic Acid | Monophyletic group |
|-------|---------------------------------------------------|-----------------|-----------------|--------------|--------------------|
| Virus | Thermoproteus tenax spherical virus 1             | 38              | 1               | DNA          | NA                 |
| Virus | Thermus phage IN93                                | 39              | 1               | DNA          | NA                 |
| Virus | Thermus phage P23-45                              | 117             | 1               | DNA          | 4                  |
| Virus | Thermus phage P23-77                              | 37              | 1               | DNA          | NA                 |
| Virus | Thermus phage P74-26                              | 116             | 1               | DNA          | 4                  |
| Virus | Thermus phage phiYS40                             | 170             | 1               | DNA          | 4                  |
| Virus | Thermus phage TMA                                 | 168             | 1               | DNA          | 4                  |
| Virus | Thetapapillomavirus 1                             | 6               | 1               | DNA          | 3                  |
| Virus | Thielaviopsis basicola mitovirus                  | 1               | 4               | RNA          | 1                  |
| Virus | Thogoto virus                                     | 7               | 5               | RNA          | NA                 |
| Virus | Thottapalayam virus                               | 3               | 5               | RNA          | NA                 |
| Virus | Thrush coronavirus HKU12-600                      | 9               | 4               | RNA          | NA                 |
| Virus | Thunberg fritillary virus                         | 12              | 4               | RNA          | 1                  |
| Virus | Tianjin totivirus                                 | 2               | 3               | RNA          | NA                 |
| Virus | Tick-borne encephalitis virus                     | 14              | 4               | RNA          | 1                  |
| Virus | Tiger puffer nervous necrosis virus               | 3               | 4               | RNA          | 1                  |
| Virus | Tioman virus                                      | 8               | 5               | RNA          | NA                 |
| Virus | Tobacco bushy top virus                           | 4               | 4               | RNA          | 1                  |
| Virus | Tobacco curly shoot alphasatellite                | 1               | 2               | DNA          | 3                  |
| Virus | Tobacco curly shoot betasatellite                 | 1               | 2               | DNA          | 3                  |
| Virus | Tobacco curly shoot virus                         | 6               | 2               | DNA          | 3                  |
| Virus | Tobacco etch virus                                | 12              | 4               | RNA          | 1                  |
| Virus | Tobacco leaf chlorosis betasatellite              | 1               | 2               | DNA          | 3                  |
| Virus | Tobacco leaf curl disease associated sequence     | 1               | 2               | DNA          | NA                 |
| Virus | Tobacco leaf curl Japan virus                     | 6               | 2               | DNA          | 3                  |
| Virus | Tobacco leaf curl Kochi virus                     | 6               | 2               | DNA          | 3                  |
| Virus | Tobacco leaf curl PUSA alphasatellite             | 1               | NA              | NA           | NA                 |
| Virus | Tobacco leaf curl Pusa virus                      | 6               | 2               | DNA          | 3                  |
| Virus | Tobacco leaf curl Thailand virus                  | 7               | 2               | DNA          | 3                  |
| Virus | Tobacco leaf curl virus-associated DNA beta       | 1               | 2               | DNA          | NA                 |
| Virus | Tobacco leaf curl Yunnan virus                    | 6               | 2               | DNA          | 3                  |
| Virus | Tobacco leaf curl Yunnan virus associated DNA 1   | 1               | 2               | DNA          | NA                 |
| Virus | Tobacco leaf curl Yunnan virus satellite DNA beta | 1               | 2               | DNA          | NA                 |
| Virus | Tobacco leaf curl Zimbabwe virus                  | 6               | 2               | DNA          | 3                  |
| Virus | Tobacco mild green mosaic virus                   | 4               | 4               | RNA          | 1                  |
| Virus | Tobacco mosaic virus                              | 6               | 4               | RNA          | 1                  |
| Virus | Tobacco necrosis satellite virus                  | 1               | NA              | RNA          | NA                 |
| Virus | Tobacco necrosis virus A                          | 5               | 4               | RNA          | 1                  |
| Virus | Tobacco necrosis virus D                          | 6               | 4               | RNA          | 1                  |
| Virus | Tobacco rattle virus                              | 7               | 4               | RNA          | 1                  |
| Virus | Tobacco ringspot virus                            | 5               | 4               | RNA          | 1                  |
| Virus | Tobacco streak virus                              | 5               | 4               | RNA          | 1                  |
| Virus | Tobacco vein banding mosaic virus                 | 12              | 4               | RNA          | 1                  |
| Virus | Tobacco vein clearing virus                       | 4               | 7               | DNA          | 2                  |
| Virus | Tobacco vein distorting virus                     | 6               | 4               | RNA          | 1                  |
| Virus | Tobacco vein mottling virus                       | 12              | 4               | RNA          | 1                  |
| Virus | Tobacco yellow crinkle virus                      | 7               | 2               | DNA          | 3                  |
| Virus | Tobacco yellow dwarf virus                        | 4               | 2               | DNA          | 3                  |
| Virus | Tolypocladium cylindrosporium virus 1             | 2               | 3               | RNA          | NA                 |
| Virus | Tomato aspermy virus                              | 5               | 4               | RNA          | 1                  |
| Virus | Tomato begomovirus satellite DNA beta             | 1               | 2               | DNA          | 3                  |
| Virus | Tomato black ring virus                           | 8               | 4               | RNA          | 1                  |
| Virus | Tomato black ring virus satellite RNA             | 1               | NA              | RNA          | NA                 |
| Virus | Tomato bushy stunt virus                          | 5               | 4               | RNA          | 1                  |
| Virus | Tomato chino La Paz virus                         | 5               | 2               | DNA          | 3                  |
| Virus | Tomato chlorosis virus                            | 13              | 4               | RNA          | 1                  |
| Virus | Tomato chlorotic mottle virus                     | 7               | 2               | DNA          | 3                  |
| Virus | Tomato chocolate spot virus                       | 6               | 4               | RNA          | NA                 |
| Virus | Tomato common mosaic virus                        | 7               | 2               | DNA          | 3                  |
| Virus | Tomato curly stunt virus                          | 5               | 2               | DNA          | 3                  |
| Virus | Tomato dwarf leaf virus                           | 7               | 2               | DNA          | 3                  |
| Virus | Tomato golden mosaic virus                        | 7               | 2               | DNA          | 3                  |
| Virus | Tomato golden mottle virus                        | 7               | 2               | DNA          | 3                  |
| Virus | Tomato infectious chlorosis virus                 | 12              | 4               | RNA          | 1                  |
| Virus | Tomato leaf curl Arusha virus                     | 6               | 2               | DNA          | 3                  |
| Virus | Tomato leaf curl Bangalore virus                  | 6               | 2               | DNA          | 3                  |
| Virus | Tomato leaf curl Bangladesh betasatellite         | 1               | 2               | DNA          | 3                  |
| Virus | Tomato leaf curl Bangladesh virus                 | 6               | 2               | DNA          | 3                  |
| Virus | Tomato leaf curl Cameroon alphasatellite          | 1               | NA              | NA           | NA                 |
| Virus | Tomato leaf curl Cameroon virus                   | 9               | 2               | DNA          | 3                  |
| Virus | Tomato leaf curl Cebu virus                       | 6               | 2               | DNA          | 3                  |
| Virus | Tomato leaf curl China betasatellite              | 2               | 2               | DNA          | 3                  |
| Virus | Tomato leaf curl China virus                      | 6               | 2               | DNA          | 3                  |
| Virus | Tomato leaf curl Cotabato virus                   | 6               | 2               | DNA          | 3                  |
| Virus | Tomato leaf curl Ghana virus                      | 6               | 2               | DNA          | 3                  |
| Virus | Tomato leaf curl Guangdong virus                  | 6               | 2               | DNA          | 3                  |
| Virus | Tomato leaf curl Guangxi virus                    | 6               | 2               | DNA          | 3                  |
| Virus | Tomato leaf curl Gujarat virus                    | 8               | 2               | DNA          | 3                  |
| Virus | Tomato leaf curl Hainan virus                     | 6               | 2               | DNA          | 3                  |
| Virus | Tomato leaf curl Hajipur betasatellite            | 1               | 2               | DNA          | 3                  |

| Type  | Name                                                     | Number of genes | Baltimore class | Nucleic Acid | Monophyletic group |
|-------|----------------------------------------------------------|-----------------|-----------------|--------------|--------------------|
| Virus | Tomato leaf curl Hanoi virus                             | 6               | 2               | DNA          | 3                  |
| Virus | Tomato leaf curl Hsinchu virus                           | 6               | 2               | DNA          | 3                  |
| Virus | Tomato leaf curl Iran virus                              | 6               | 2               | DNA          | 3                  |
| Virus | Tomato leaf curl Java virus                              | 6               | 2               | DNA          | 3                  |
| Virus | Tomato leaf curl Joydebpur virus                         | 6               | 2               | DNA          | 3                  |
| Virus | Tomato leaf curl Joydebpur virus satellite DNA beta      | 1               | 2               | DNA          | 3                  |
| Virus | Tomato leaf curl Karnataka virus                         | 6               | 2               | DNA          | 3                  |
| Virus | Tomato leaf curl Karnataka virus-associated DNA beta     | 1               | 2               | DNA          | 3                  |
| Virus | Tomato leaf curl Kerala virus                            | 6               | 2               | DNA          | 3                  |
| Virus | Tomato leaf curl Kumasi virus                            | 6               | 2               | DNA          | 3                  |
| Virus | Tomato leaf curl Laos virus                              | 6               | 2               | DNA          | 3                  |
| Virus | Tomato leaf curl Malaysia virus                          | 6               | 2               | DNA          | 3                  |
| Virus | Tomato leaf curl Mali virus                              | 6               | 2               | DNA          | 3                  |
| Virus | Tomato leaf curl Mayotte virus                           | 6               | 2               | DNA          | 3                  |
| Virus | Tomato leaf curl Mindanao virus                          | 6               | 2               | DNA          | 3                  |
| Virus | Tomato leaf curl New Delhi betasatellite                 | 1               | 2               | DNA          | NA                 |
| Virus | Tomato leaf curl New Delhi virus                         | 10              | 2               | DNA          | 3                  |
| Virus | Tomato leaf curl Oman virus                              | 6               | 2               | DNA          | 3                  |
| Virus | Tomato leaf curl Pakistan alphasatellite                 | 1               | 2               | DNA          | NA                 |
| Virus | Tomato leaf curl Pakistan virus                          | 6               | 2               | DNA          | 3                  |
| Virus | Tomato leaf curl Palampur virus                          | 9               | 2               | DNA          | 3                  |
| Virus | Tomato leaf curl Patna betasatellite                     | 1               | 2               | DNA          | 3                  |
| Virus | Tomato leaf curl Patna virus                             | 7               | 2               | DNA          | 3                  |
| Virus | Tomato leaf curl Philippine betasatellite                | 1               | 2               | DNA          | NA                 |
| Virus | Tomato leaf curl Philippines virus                       | 6               | 2               | DNA          | 3                  |
| Virus | Tomato leaf curl Pune virus                              | 6               | 2               | DNA          | 3                  |
| Virus | Tomato leaf curl Ranchi virus                            | 7               | 2               | DNA          | 3                  |
| Virus | Tomato leaf curl Seychelles virus                        | 3               | 2               | DNA          | 3                  |
| Virus | Tomato leaf curl Sinaloa virus                           | 7               | 2               | DNA          | 3                  |
| Virus | Tomato leaf curl Sri Lanka virus                         | 6               | 2               | DNA          | 3                  |
| Virus | Tomato leaf curl Sudan virus                             | 6               | 2               | DNA          | 3                  |
| Virus | Tomato leaf curl Sulawesi virus                          | 6               | 2               | DNA          | 3                  |
| Virus | Tomato leaf curl Taiwan virus                            | 6               | 2               | DNA          | 3                  |
| Virus | Tomato leaf curl Vietnam virus                           | 6               | 2               | DNA          | 3                  |
| Virus | Tomato leaf curl virus                                   | 6               | 2               | DNA          | 3                  |
| Virus | Tomato leaf curl virus-associated DNA beta               | 1               | 2               | DNA          | 3                  |
| Virus | Tomato leaf curl virus-Pune-associated DNA beta          | 1               | 2               | DNA          | 3                  |
| Virus | Tomato leaf curl Yemen betasatellite                     | 1               | 2               | DNA          | 3                  |
| Virus | Tomato leaf deformation virus                            | 11              | 2               | DNA          | 3                  |
| Virus | Tomato marchitez virus                                   | 8               | 4               | RNA          | 1                  |
| Virus | Tomato mild mosaic virus                                 | 7               | 2               | DNA          | 3                  |
| Virus | Tomato mosaic Havana virus                               | 7               | 2               | DNA          | 3                  |
| Virus | Tomato mosaic leaf curl virus                            | 7               | 2               | DNA          | 3                  |
| Virus | Tomato mosaic virus                                      | 4               | 4               | RNA          | 1                  |
| Virus | Tomato mottle leaf curl Zulia virus                      | 4               | 2               | DNA          | 3                  |
| Virus | Tomato mottle Taino virus                                | 6               | 2               | DNA          | 3                  |
| Virus | Tomato mottle virus                                      | 6               | 2               | DNA          | 3                  |
| Virus | Tomato necrotic stunt virus                              | 12              | 4               | RNA          | 1                  |
| Virus | Tomato pseudo-curly top virus                            | 6               | 2               | DNA          | 3                  |
| Virus | Tomato ringspot virus                                    | 10              | 4               | RNA          | 1                  |
| Virus | Tomato rugose mosaic virus                               | 7               | 2               | DNA          | 3                  |
| Virus | Tomato severe leaf curl virus                            | 4               | 2               | DNA          | 3                  |
| Virus | Tomato severe rugose virus                               | 7               | 2               | DNA          | 3                  |
| Virus | Tomato spotted wilt virus                                | 5               | 5               | RNA          | NA                 |
| Virus | Tomato torrado virus                                     | 3               | 4               | RNA          | 1                  |
| Virus | Tomato yellow leaf curl China alphasatellite             | 1               | 2               | DNA          | NA                 |
| Virus | Tomato yellow leaf curl China virus                      | 6               | 2               | DNA          | 3                  |
| Virus | Tomato yellow leaf curl Guangdong virus                  | 6               | 2               | DNA          | 3                  |
| Virus | Tomato yellow leaf curl Kanchanaburi virus               | 8               | 2               | DNA          | 3                  |
| Virus | Tomato yellow leaf curl Malaga virus                     | 6               | 2               | DNA          | 3                  |
| Virus | Tomato yellow leaf curl Mali virus-associated DNA beta   | 1               | 2               | DNA          | 3                  |
| Virus | Tomato yellow leaf curl Sardinia virus                   | 6               | 2               | DNA          | 3                  |
| Virus | Tomato yellow leaf curl Thailand betasatellite           | 2               | 2               | DNA          | 3                  |
| Virus | Tomato yellow leaf curl Thailand virus                   | 10              | 2               | DNA          | 3                  |
| Virus | Tomato yellow leaf curl Thailand virus associated DNA 1  | 1               | 2               | DNA          | NA                 |
| Virus | Tomato yellow leaf curl Vietnam virus                    | 6               | 2               | DNA          | 3                  |
| Virus | Tomato yellow leaf curl Vietnam virus satellite DNA beta | 1               | 2               | DNA          | 3                  |
| Virus | Tomato yellow leaf curl virus                            | 6               | 2               | DNA          | 3                  |
| Virus | Tomato yellow leaf curl virus-associated DNA beta        | 1               | 2               | DNA          | NA                 |
| Virus | Tomato yellow leaf distortion virus                      | 7               | 2               | DNA          | 3                  |
| Virus | Tomato yellow margin leaf curl virus                     | 7               | 2               | DNA          | 3                  |
| Virus | Tomato yellow spot virus                                 | 6               | 2               | DNA          | 3                  |
| Virus | Tomato yellow vein streak virus                          | 7               | 2               | DNA          | 3                  |
| Virus | Tomato zonate spot virus                                 | 5               | 5               | RNA          | NA                 |
| Virus | Torque teno canis virus                                  | 3               | 2               | DNA          | NA                 |
| Virus | Torque teno douroucouli virus                            | 3               | 2               | DNA          | NA                 |
| Virus | Torque teno felis virus                                  | 3               | 2               | DNA          | NA                 |
| Virus | Torque teno midi virus 1                                 | 4               | 2               | DNA          | NA                 |
| Virus | Torque teno midi virus 2                                 | 4               | 2               | DNA          | NA                 |
| Virus | Torque teno mini virus 1                                 | 3               | 2               | DNA          | NA                 |

| Type  | Name                                              | Number of genes | Baltimore class | Nucleic Acid | Monophyletic group |
|-------|---------------------------------------------------|-----------------|-----------------|--------------|--------------------|
| Virus | Torque teno mini virus 2                          | 3               | 2               | DNA          | NA                 |
| Virus | Torque teno mini virus 3                          | 3               | 2               | DNA          | NA                 |
| Virus | Torque teno mini virus 4                          | 2               | 2               | DNA          | NA                 |
| Virus | Torque teno mini virus 5                          | 3               | 2               | DNA          | NA                 |
| Virus | Torque teno mini virus 6                          | 3               | 2               | DNA          | NA                 |
| Virus | Torque teno mini virus 7                          | 2               | 2               | DNA          | NA                 |
| Virus | Torque teno mini virus 8                          | 2               | 2               | DNA          | NA                 |
| Virus | Torque teno mini virus 9                          | 3               | 2               | DNA          | NA                 |
| Virus | Torque teno sus virus 1a                          | 3               | 2               | DNA          | NA                 |
| Virus | Torque teno sus virus 1b                          | 3               | 2               | DNA          | NA                 |
| Virus | Torque teno tamarin virus                         | 4               | 2               | DNA          | NA                 |
| Virus | Torque teno virus 1                               | 3               | 2               | DNA          | NA                 |
| Virus | Torque teno virus 10                              | 4               | 2               | DNA          | NA                 |
| Virus | Torque teno virus 12                              | 4               | 2               | DNA          | NA                 |
| Virus | Torque teno virus 14                              | 2               | 2               | DNA          | NA                 |
| Virus | Torque teno virus 15                              | 2               | 2               | DNA          | NA                 |
| Virus | Torque teno virus 16                              | 2               | 2               | DNA          | NA                 |
| Virus | Torque teno virus 19                              | 2               | 2               | DNA          | NA                 |
| Virus | Torque teno virus 2                               | 2               | 2               | DNA          | NA                 |
| Virus | Torque teno virus 25                              | 3               | 2               | DNA          | NA                 |
| Virus | Torque teno virus 26                              | 3               | 2               | DNA          | NA                 |
| Virus | Torque teno virus 27                              | 4               | 2               | DNA          | NA                 |
| Virus | Torque teno virus 28                              | 4               | 2               | DNA          | NA                 |
| Virus | Torque teno virus 3                               | 6               | 2               | DNA          | NA                 |
| Virus | Torque teno virus 4                               | 2               | 2               | DNA          | NA                 |
| Virus | Torque teno virus 6                               | 4               | 2               | DNA          | NA                 |
| Virus | Torque teno virus 7                               | 3               | 2               | DNA          | NA                 |
| Virus | Torque teno virus 8                               | 4               | 2               | DNA          | NA                 |
| Virus | Tree shrew adenovirus A                           | 36              | 1               | DNA          | NA                 |
| Virus | Triatoma virus                                    | 2               | 4               | RNA          | 1                  |
| Virus | Trichechus manatus latirostris papillomavirus 2   | 7               | 1               | DNA          | 3                  |
| Virus | Trichechus manatus papillomavirus 1               | 7               | 1               | DNA          | 3                  |
| Virus | Trichodysplasia spinulosa-associated polyomavirus | 5               | 1               | DNA          | 3                  |
| Virus | Trichomonas vaginalis virus                       | 2               | 3               | RNA          | NA                 |
| Virus | Trichomonas vaginalis virus 3                     | 2               | 3               | RNA          | NA                 |
| Virus | Trichomonas vaginalis virus II                    | 2               | 3               | RNA          | NA                 |
| Virus | Trichoplusia ni ascovirus 2c                      | 164             | 1               | DNA          | 5                  |
| Virus | Trichoplusia ni cypovirus 15                      | 1               | 3               | RNA          | NA                 |
| Virus | Trichoplusia ni SNPV                              | 145             | 1               | DNA          | NA                 |
| Virus | Triticum mosaic virus                             | 11              | 4               | RNA          | 1                  |
| Virus | Tsukamurella phage TPA2                           | 78              | 1               | DNA          | 4                  |
| Virus | Tuber aestivum endornavirus                       | 1               | 3               | RNA          | NA                 |
| Virus | Tuber aestivum mitovirus                          | 1               | 4               | RNA          | 1                  |
| Virus | Tula virus                                        | 4               | 5               | RNA          | NA                 |
| Virus | Tulare apple mosaic virus                         | 5               | 4               | RNA          | 1                  |
| Virus | Tulip virus X                                     | 5               | 4               | RNA          | 1                  |
| Virus | Tupaia paramyxovirus                              | 8               | 5               | RNA          | NA                 |
| Virus | Tupaia virus                                      | 7               | 5               | RNA          | NA                 |
| Virus | Tupaiaid herpesvirus 1                            | 158             | 1               | DNA          | NA                 |
| Virus | Turdivirus 1                                      | 12              | 4               | RNA          | 1                  |
| Virus | Turdivirus 2                                      | 12              | 4               | RNA          | 1                  |
| Virus | Turdivirus 3                                      | 12              | 4               | RNA          | 1                  |
| Virus | Turkey adenovirus 1                               | 37              | 1               | DNA          | NA                 |
| Virus | Turkey adenovirus A                               | 47              | 1               | DNA          | NA                 |
| Virus | Turkey astrovirus                                 | 3               | 4               | RNA          | 1                  |
| Virus | Turkey astrovirus 2                               | 3               | 4               | RNA          | 1                  |
| Virus | Turkey coronavirus                                | 26              | 4               | RNA          | NA                 |
| Virus | Turkey gallivirus                                 | 1               | 4               | RNA          | 1                  |
| Virus | Turnip crinkle virus                              | 4               | 4               | RNA          | 1                  |
| Virus | Turnip curly top virus                            | 6               | 2               | DNA          | 3                  |
| Virus | Turnip mosaic virus                               | 12              | 4               | RNA          | 1                  |
| Virus | Turnip ringspot virus                             | 2               | 4               | RNA          | 1                  |
| Virus | Turnip rosette virus                              | 8               | 4               | RNA          | 1                  |
| Virus | Turnip vein-clearing virus                        | 4               | 4               | RNA          | 1                  |
| Virus | Turnip yellow mosaic virus                        | 5               | 4               | RNA          | 1                  |
| Virus | Turnip yellows virus                              | 6               | 4               | RNA          | 1                  |
| Virus | Tursiops truncatus papillomavirus 1               | 7               | 1               | DNA          | 3                  |
| Virus | Tursiops truncatus papillomavirus 2               | 7               | 1               | DNA          | 3                  |
| Virus | UR2 sarcoma virus                                 | 2               | 6               | RNA          | 2                  |
| Virus | Urochloa streak virus                             | 3               | 2               | DNA          | 3                  |
| Virus | Ursus maritimus papillomavirus 1                  | 5               | 1               | DNA          | 3                  |
| Virus | Ustilago maydis virus H1                          | 1               | 3               | RNA          | NA                 |
| Virus | Usutu virus                                       | 16              | 4               | RNA          | 1                  |
| Virus | Uukuniemi virus                                   | 6               | 5               | RNA          | NA                 |
| Virus | Vaccinia virus                                    | 223             | 1               | DNA          | 5                  |
| Virus | Vallota speciosa virus                            | 11              | 4               | RNA          | 1                  |
| Virus | Valsa ceratosperma hypovirus 1                    | 1               | 3               | RNA          | NA                 |
| Virus | Variola virus                                     | 197             | 1               | DNA          | 5                  |
| Virus | Varroa destructor virus-1                         | 1               | 4               | RNA          | 1                  |
| Virus | Velvet bean severe mosaic virus                   | 9               | 2               | DNA          | 3                  |

| Type  | Name                                             | Number of genes | Baltimore class | Nucleic Acid | Monophyletic group |
|-------|--------------------------------------------------|-----------------|-----------------|--------------|--------------------|
| Virus | Velvet tobacco mottle virus                      | 4               | 4               | RNA          | 1                  |
| Virus | Venezuelan equine encephalitis virus             | 14              | 4               | RNA          | 1                  |
| Virus | Verbena virus Y                                  | 12              | 4               | RNA          | 1                  |
| Virus | Vernonia yellow vein betasatellite               | 1               | 2               | DNA          | NA                 |
| Virus | Vernonia yellow vein Fujian virus alphasatellite | 1               | NA              | NA           | NA                 |
| Virus | Vernonia yellow vein Fujian virus betasatellite  | 1               | 2               | DNA          | 3                  |
| Virus | Vernonia yellow vein virus                       | 7               | 2               | DNA          | 3                  |
| Virus | Vesicular exanthema of swine virus               | 12              | 4               | RNA          | 1                  |
| Virus | Vesicular stomatitis Indiana virus               | 7               | 5               | RNA          | NA                 |
| Virus | Vibrio phage CTX                                 | 13              | 2               | DNA          | NA                 |
| Virus | Vibrio phage fs1                                 | 15              | 2               | DNA          | NA                 |
| Virus | Vibrio phage fs2                                 | 9               | 2               | DNA          | NA                 |
| Virus | Vibrio phage ICP1                                | 232             | 1               | DNA          | 4                  |
| Virus | Vibrio phage ICP2                                | 72              | 1               | DNA          | 4                  |
| Virus | Vibrio phage ICP3                                | 54              | 1               | DNA          | 4                  |
| Virus | Vibrio phage K139                                | 44              | 1               | DNA          | 4                  |
| Virus | Vibrio phage kappa                               | 45              | 1               | DNA          | 4                  |
| Virus | Vibrio phage KSF-1phi                            | 12              | 2               | DNA          | NA                 |
| Virus | Vibrio phage KVP40                               | 381             | 1               | DNA          | 4                  |
| Virus | Vibrio phage N4                                  | 47              | 1               | DNA          | 4                  |
| Virus | Vibrio phage SIO-2                               | 115             | 1               | DNA          | 4                  |
| Virus | Vibrio phage VCY-phi                             | 11              | 2               | DNA          | 3                  |
| Virus | Vibrio phage VEJphi                              | 11              | 2               | DNA          | NA                 |
| Virus | Vibrio phage Vf12                                | 7               | 2               | DNA          | NA                 |
| Virus | Vibrio phage Vf33                                | 7               | 2               | DNA          | NA                 |
| Virus | Vibrio phage VfO3K6                              | 10              | 2               | DNA          | NA                 |
| Virus | Vibrio phage VfO4K68                             | 8               | 2               | DNA          | NA                 |
| Virus | Vibrio phage VGJphi                              | 13              | 2               | DNA          | NA                 |
| Virus | Vibrio phage VHML                                | 57              | 1               | DNA          | 4                  |
| Virus | Vibrio phage VP2                                 | 47              | 1               | DNA          | 4                  |
| Virus | Vibrio phage VP5                                 | 48              | 1               | DNA          | 4                  |
| Virus | Vibrio phage VP882                               | 71              | 1               | DNA          | 4                  |
| Virus | Vibrio phage VP93                                | 44              | 1               | DNA          | 4                  |
| Virus | Vibrio phage VpV262                              | 67              | 1               | DNA          | 4                  |
| Virus | Vibrio phage VSK                                 | 14              | 2               | DNA          | NA                 |
| Virus | Vibriophage VP4                                  | 31              | 1               | DNA          | 4                  |
| Virus | Vicia cryptic virus                              | 2               | 3               | RNA          | 1                  |
| Virus | Vicia faba endornavirus                          | 1               | 3               | RNA          | NA                 |
| Virus | Viral hemorrhagic septicemia virus Fil3          | 6               | 5               | RNA          | NA                 |
| Virus | Visna/Maedi virus                                | 6               | 6               | RNA          | 2                  |
| Virus | Walleye dermal sarcoma virus                     | 6               | 6               | RNA          | 2                  |
| Virus | Walrus calicivirus                               | 12              | 4               | RNA          | 1                  |
| Virus | Wasabi mottle virus                              | 4               | 4               | RNA          | 1                  |
| Virus | Watermelon chlorotic stunt virus                 | 8               | 2               | DNA          | 3                  |
| Virus | Watermelon mosaic virus                          | 12              | 4               | RNA          | 1                  |
| Virus | Watermelon silver mottle virus                   | 5               | 5               | RNA          | NA                 |
| Virus | Weissella phage phiYS61                          | 48              | 1               | DNA          | 4                  |
| Virus | Wesselsbron virus                                | 1               | 4               | RNA          | 1                  |
| Virus | West Nile virus                                  | 29              | 4               | RNA          | 1                  |
| Virus | Western equine encephalomyelitis virus           | 14              | 4               | RNA          | 1                  |
| Virus | Whataroa virus                                   | 4               | 4               | RNA          | 1                  |
| Virus | Wheat dwarf India virus                          | 4               | 2               | DNA          | 3                  |
| Virus | Wheat dwarf virus                                | 4               | 2               | DNA          | 3                  |
| Virus | Wheat eqld mosaic virus                          | 11              | 4               | RNA          | 1                  |
| Virus | Wheat streak mosaic virus                        | 12              | 4               | RNA          | 1                  |
| Virus | Wheat yellow dwarf virus-GPV                     | 6               | 4               | RNA          | 1                  |
| Virus | Wheat yellow mosaic virus                        | 13              | 4               | RNA          | 1                  |
| Virus | White ash mosaic virus                           | 5               | 4               | RNA          | NA                 |
| Virus | White bream virus                                | 5               | 4               | RNA          | NA                 |
| Virus | White clover cryptic virus 1                     | 2               | 3               | RNA          | 1                  |
| Virus | White clover mosaic virus                        | 5               | 4               | RNA          | 1                  |
| Virus | White-eye coronavirus HKU16                      | 8               | 4               | RNA          | NA                 |
| Virus | Whitewater Arroyo virus                          | 4               | 5               | RNA          | NA                 |
| Virus | Wigeon coronavirus HKU20                         | 10              | 4               | RNA          | NA                 |
| Virus | Wild potato mosaic virus                         | 11              | 4               | RNA          | 1                  |
| Virus | Wild tomato mosaic virus                         | 12              | 4               | RNA          | 1                  |
| Virus | Wiseana iridescent virus                         | 193             | 1               | DNA          | 5                  |
| Virus | Wissadula golden mosaic virus                    | 7               | 2               | DNA          | 3                  |
| Virus | Wisteria vein mosaic virus                       | 12              | 4               | RNA          | 1                  |
| Virus | Wongabel virus                                   | 10              | 5               | RNA          | NA                 |
| Virus | Woodchuck hepatitis virus                        | 5               | 7               | DNA          | 2                  |
| Virus | Woolly monkey sarcoma virus                      | 10              | 6               | RNA          | 2                  |
| Virus | WU Polyomavirus                                  | 5               | 1               | DNA          | 3                  |
| Virus | Xanthomonas phage Cf1c                           | 9               | 2               | DNA          | NA                 |
| Virus | Xanthomonas phage OP1                            | 59              | 1               | DNA          | 4                  |
| Virus | Xanthomonas phage OP2                            | 62              | 1               | DNA          | 4                  |
| Virus | Xanthomonas phage phiL7                          | 58              | 1               | DNA          | 4                  |
| Virus | Xanthomonas phage vB_XveM_DIBBI                  | 81              | 1               | DNA          | 4                  |
| Virus | Xanthomonas phage Xop411                         | 58              | 1               | DNA          | 4                  |
| Virus | Xanthomonas phage Xp10                           | 60              | 1               | DNA          | 4                  |

| Type  | Name                                         | Number of genes | Baltimore class | Nucleic Acid | Monophyletic group |
|-------|----------------------------------------------|-----------------|-----------------|--------------|--------------------|
| Virus | Xanthomonas phage Xp15                       | 84              | 1               | DNA          | NA                 |
| Virus | Xenopus laevis endogenous retrovirus Xen1    | 2               | 6               | RNA          | 2                  |
| Virus | Xestia c-nigrum granulovirus                 | 181             | 1               | DNA          | NA                 |
| Virus | Xipapillomavirus 1                           | 8               | 1               | DNA          | 3                  |
| Virus | Xylella phage Xfas53                         | 45              | 1               | DNA          | 4                  |
| Virus | Y73 sarcoma virus                            | 1               | 6               | RNA          | 2                  |
| Virus | Yaba monkey tumor virus                      | 140             | 1               | DNA          | 5                  |
| Virus | Yaba-like disease virus                      | 152             | 1               | DNA          | 5                  |
| Virus | Yam bean mosaic virus                        | 12              | 4               | RNA          | 1                  |
| Virus | Yam mild mosaic virus                        | 12              | 4               | RNA          | 1                  |
| Virus | Yam mosaic virus                             | 12              | 4               | RNA          | 1                  |
| Virus | Yellow fever virus                           | 14              | 4               | RNA          | 1                  |
| Virus | Yellowtail ascites virus                     | 3               | 3               | RNA          | NA                 |
| Virus | Yersinia phage Berlin                        | 45              | 1               | DNA          | 4                  |
| Virus | Yersinia phage L-413C                        | 40              | 1               | DNA          | 4                  |
| Virus | Yersinia phage phiA1122                      | 50              | 1               | DNA          | 4                  |
| Virus | Yersinia phage phiR1-37                      | 367             | 1               | DNA          | 4                  |
| Virus | Yersinia phage phiYeO3-12                    | 59              | 1               | DNA          | 4                  |
| Virus | Yersinia phage PY54                          | 67              | 1               | DNA          | 4                  |
| Virus | Yersinia phage Yepe2                         | 46              | 1               | DNA          | 4                  |
| Virus | Yoka poxvirus                                | 186             | 1               | DNA          | 5                  |
| Virus | Yokose virus                                 | 1               | 4               | RNA          | 1                  |
| Virus | Youcai mosaic virus                          | 3               | 4               | RNA          | 1                  |
| Virus | Yunnan orbivirus                             | 11              | 3               | RNA          | NA                 |
| Virus | Zalophus californianus papillomavirus 1      | 7               | 1               | DNA          | 3                  |
| Virus | Zantedeschia mild mosaic virus               | 12              | 4               | RNA          | 1                  |
| Virus | Zika virus                                   | 1               | 4               | RNA          | 1                  |
| Virus | Zinnia leaf curl disease associated sequence | 1               | 2               | DNA          | NA                 |
| Virus | Zinnia leaf curl virus-associated DNA beta   | 1               | 2               | DNA          | NA                 |
| Virus | Zucchini green mottle mosaic virus           | 4               | 4               | RNA          | 1                  |
| Virus | Zucchini yellow mosaic virus                 | 12              | 4               | RNA          | 1                  |
| Virus | Zygocactus virus X                           | 5               | 4               | RNA          | 1                  |
| Virus | Zygosaccharomyces bailii virus Z             | 2               | 3               | RNA          | NA                 |
